# Supplementary material for: Discovery of Novel Cinnamide Fungicidal Leads with Optical Hydroxyl Side Chain
Source: MDPI journal article supplement (doi:10.3390/molecules27165259), 2022-08-17
Supplement: s1 [file s1]

*Supplementary Materials for Molecules*

Discovery of Novel Cinnamide Fungicidal Leads with Optical Hydroxyl Side Chain

Weiwei Wang <sup>1</sup>, Jiazhen Jiang<sup>1</sup>, Zhenhua Zhang<sup>1</sup> and Mingan Wang<sup>1,\*</sup>

*Innovation Center of Pesticide Research, Department of Applied Chemistry, China Agricultural University,*

*Beijing 100193, China*

\*Corresponding author: Prof. Dr. Mingan Wang

E-mail: wangma@cau.edu.cn

Tel: +86-13621078240

Fax: +86-01-62737732

## Contents

|                                                               |         |
|---------------------------------------------------------------|---------|
| 1. NMR spectra for the intermediates and title compounds..... | S2-S50  |
| 2. HPLC profiles of five representative compounds.....        | S51-S58 |

1. NMR spectra for the intermediates and title compounds

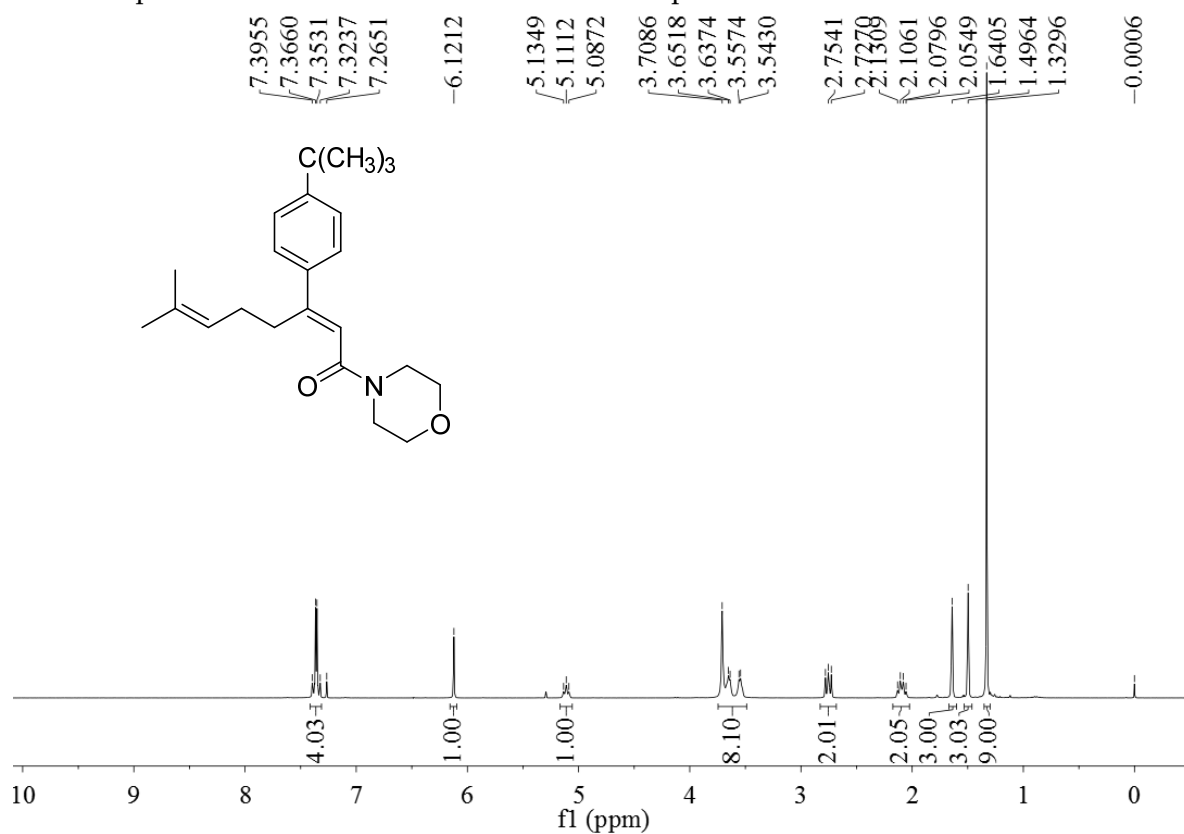

Figure S1.  $^1\text{H}$  NMR of Compound 10a

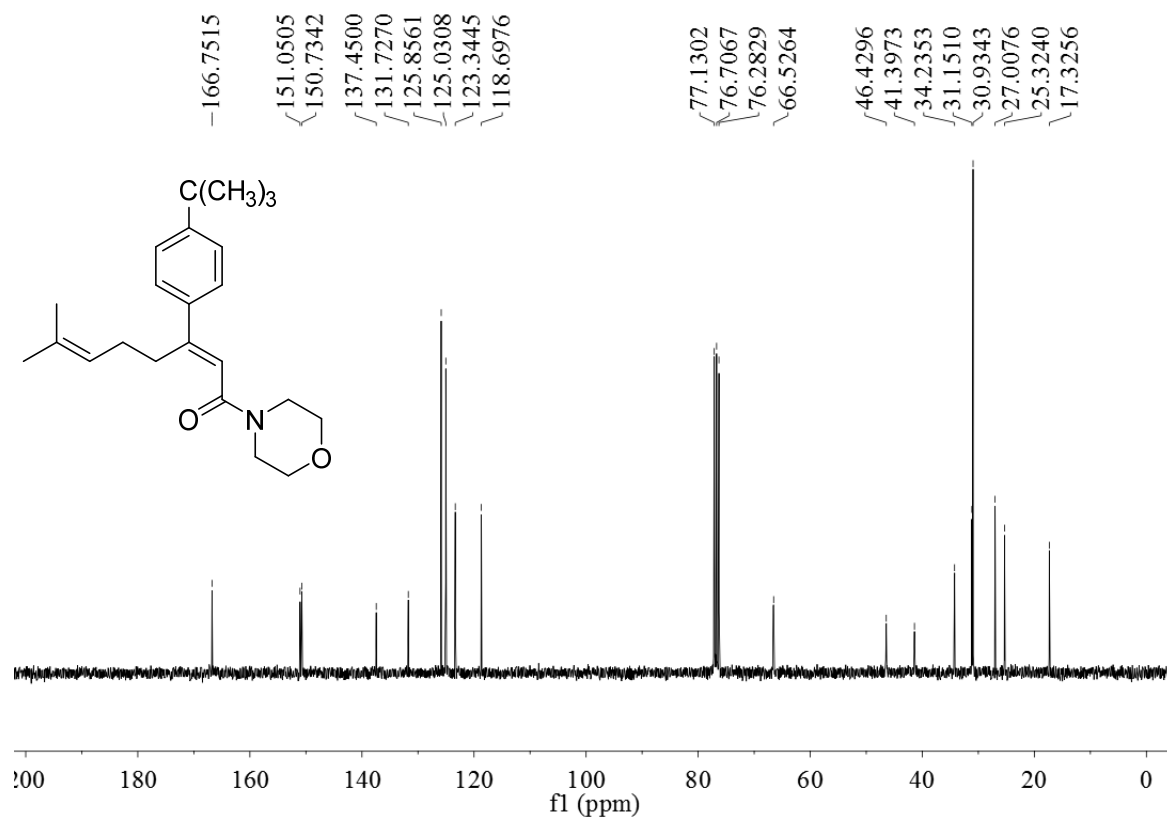

Figure S2.  $^{13}\text{C}$  NMR spectrum of 10a

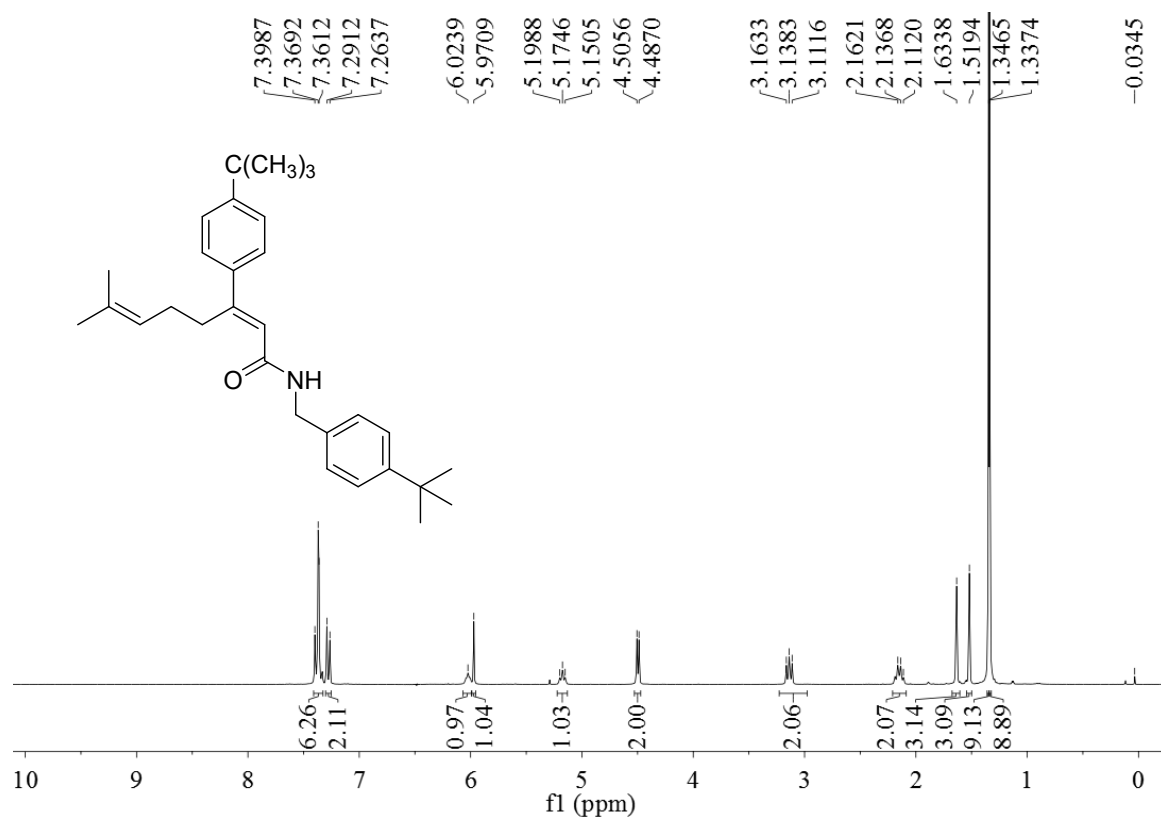

Figure S3. <sup>1</sup>H NMR of Compound 10b

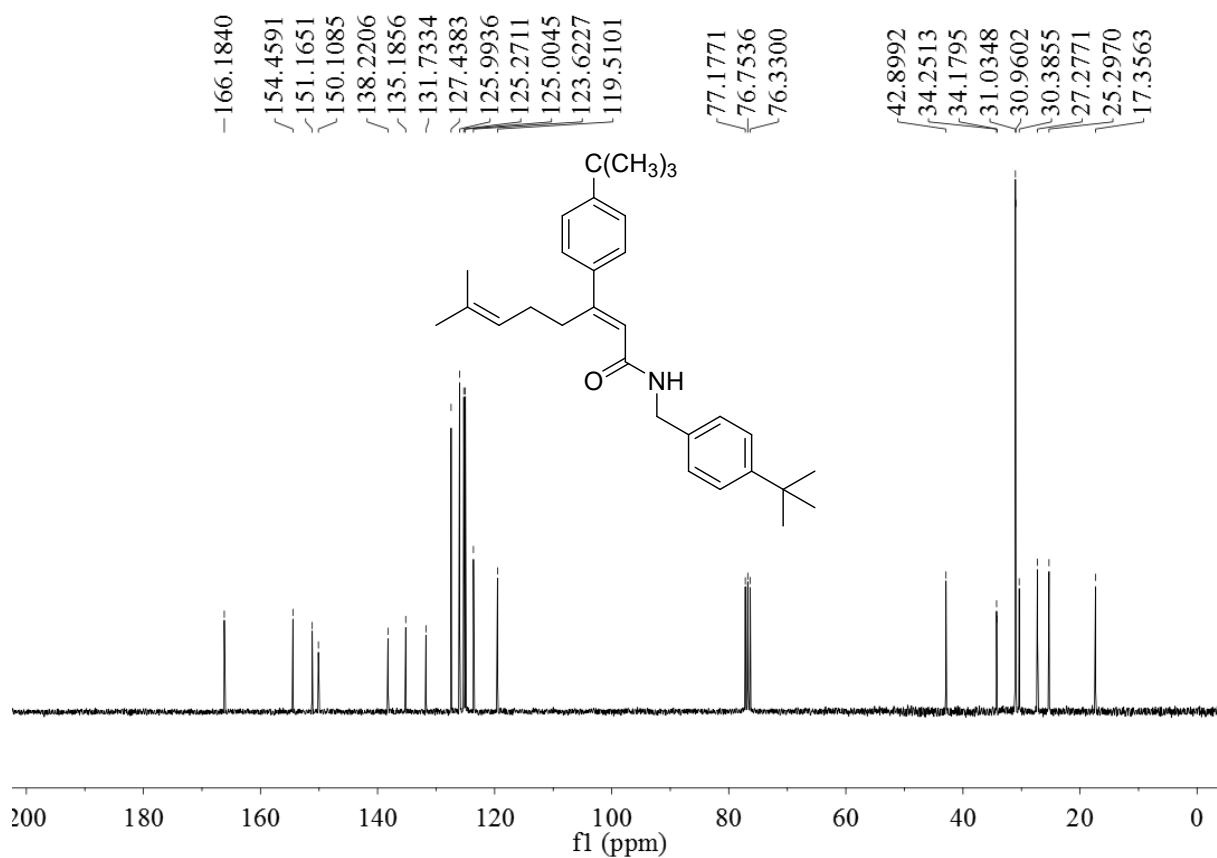

Figure S4. <sup>13</sup>C NMR spectrum of 10b

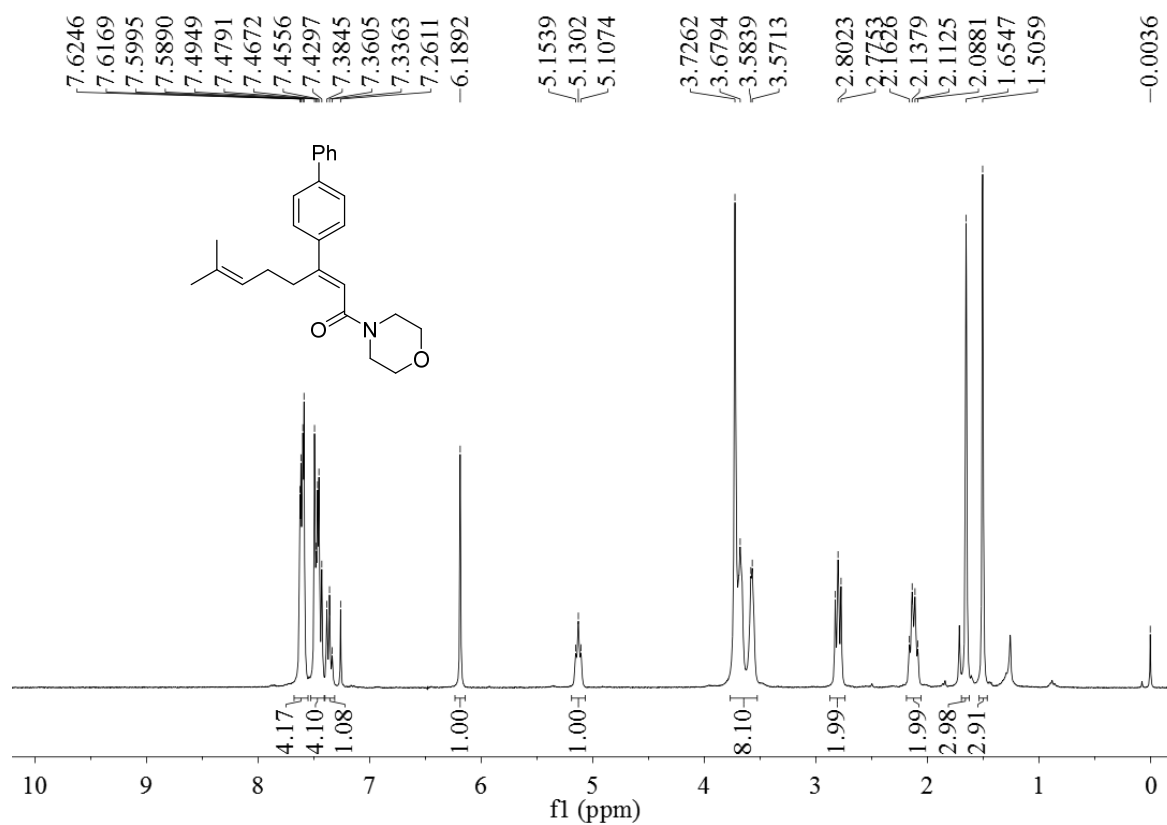

Figure S5. <sup>1</sup>H NMR of Compound 10c

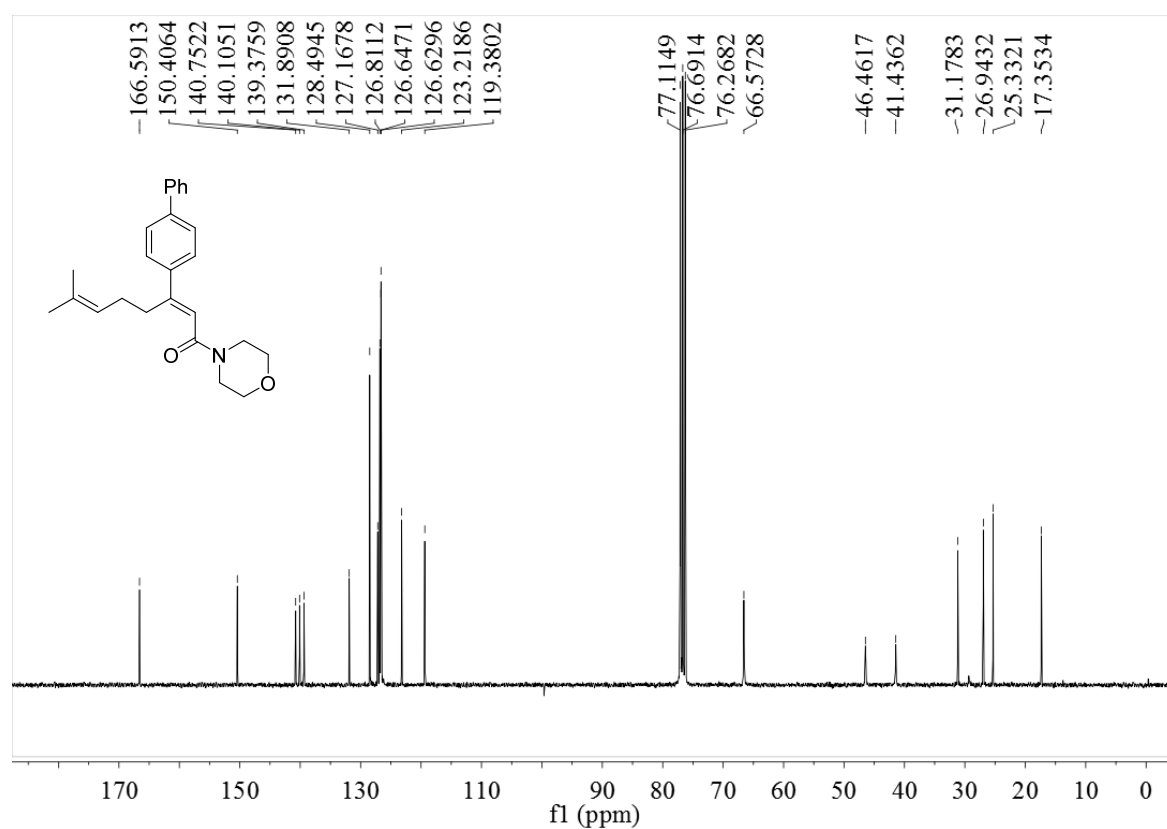

Figure S6. <sup>13</sup>C NMR spectrum of 10c

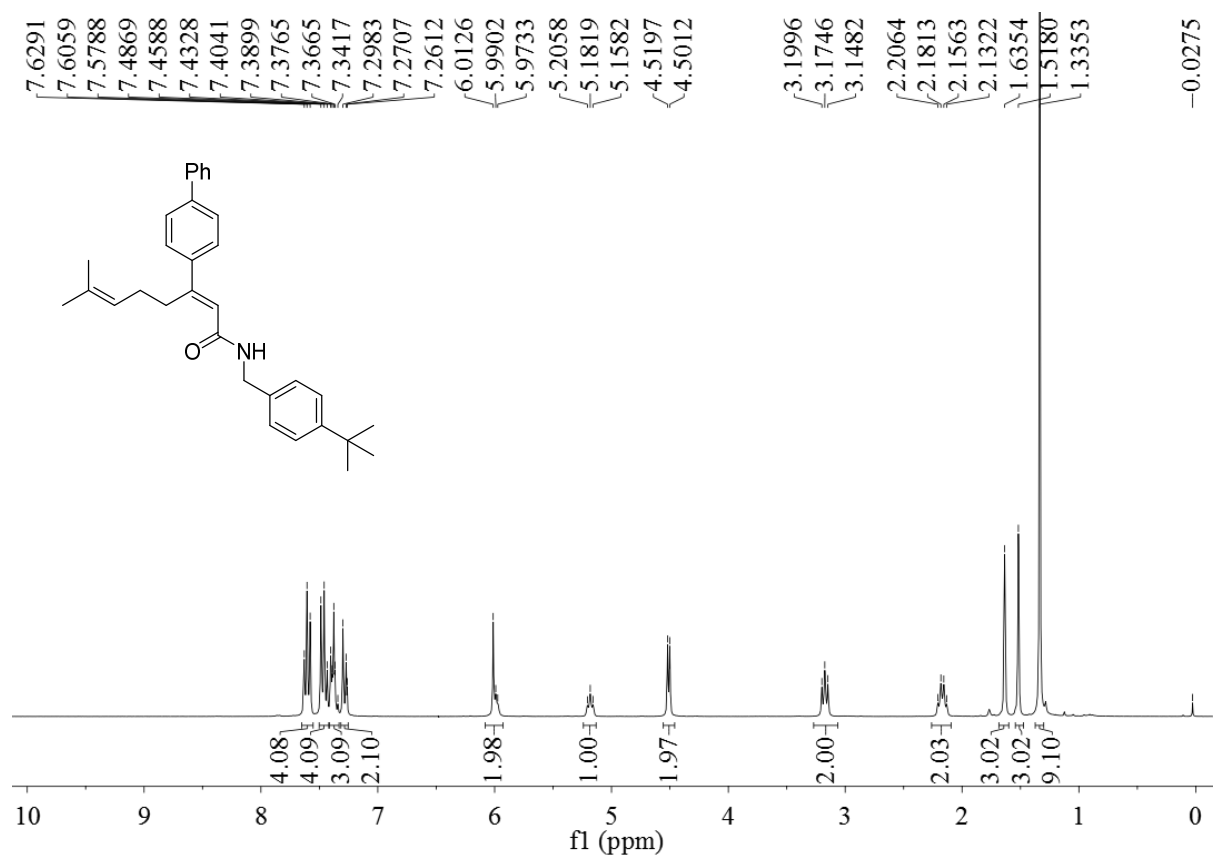

Figure S7. <sup>1</sup>H NMR of Compound 10d

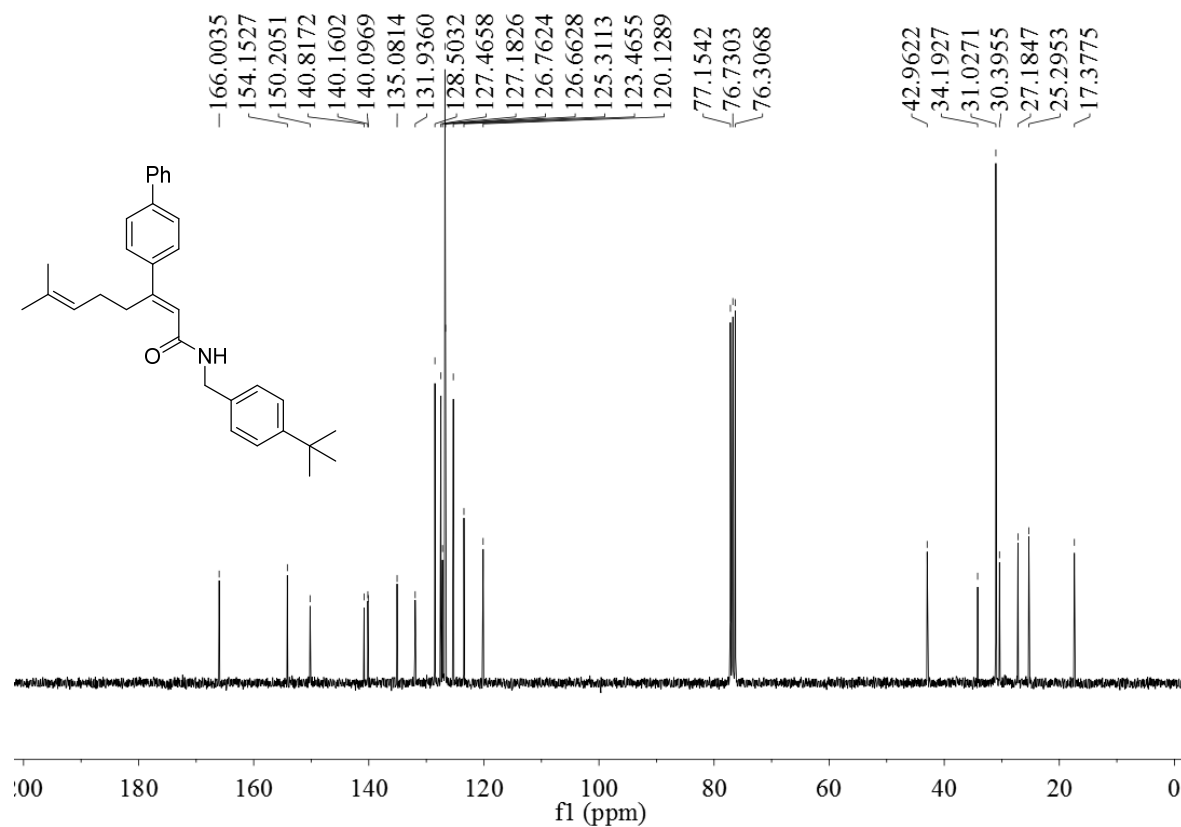

Figure S8. <sup>13</sup>C NMR spectrum of 10d

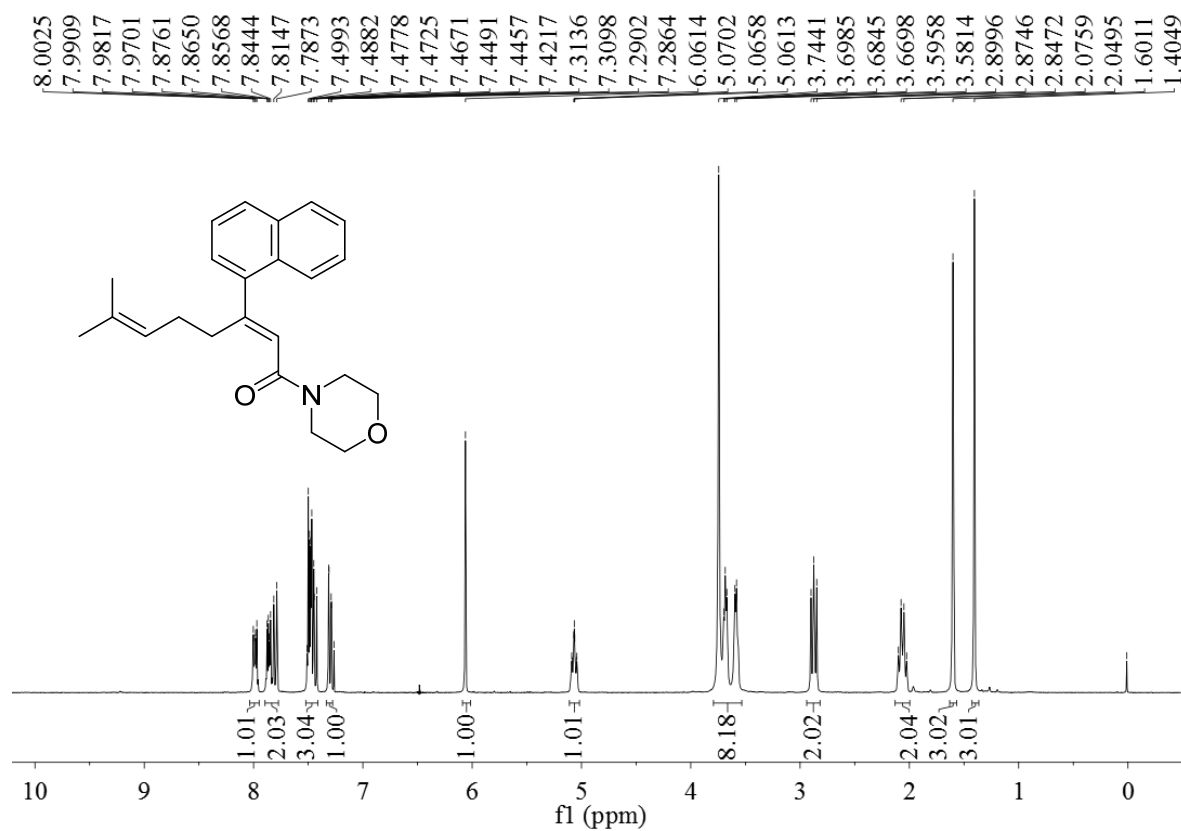

Figure S9. <sup>1</sup>H NMR of Compound 10e

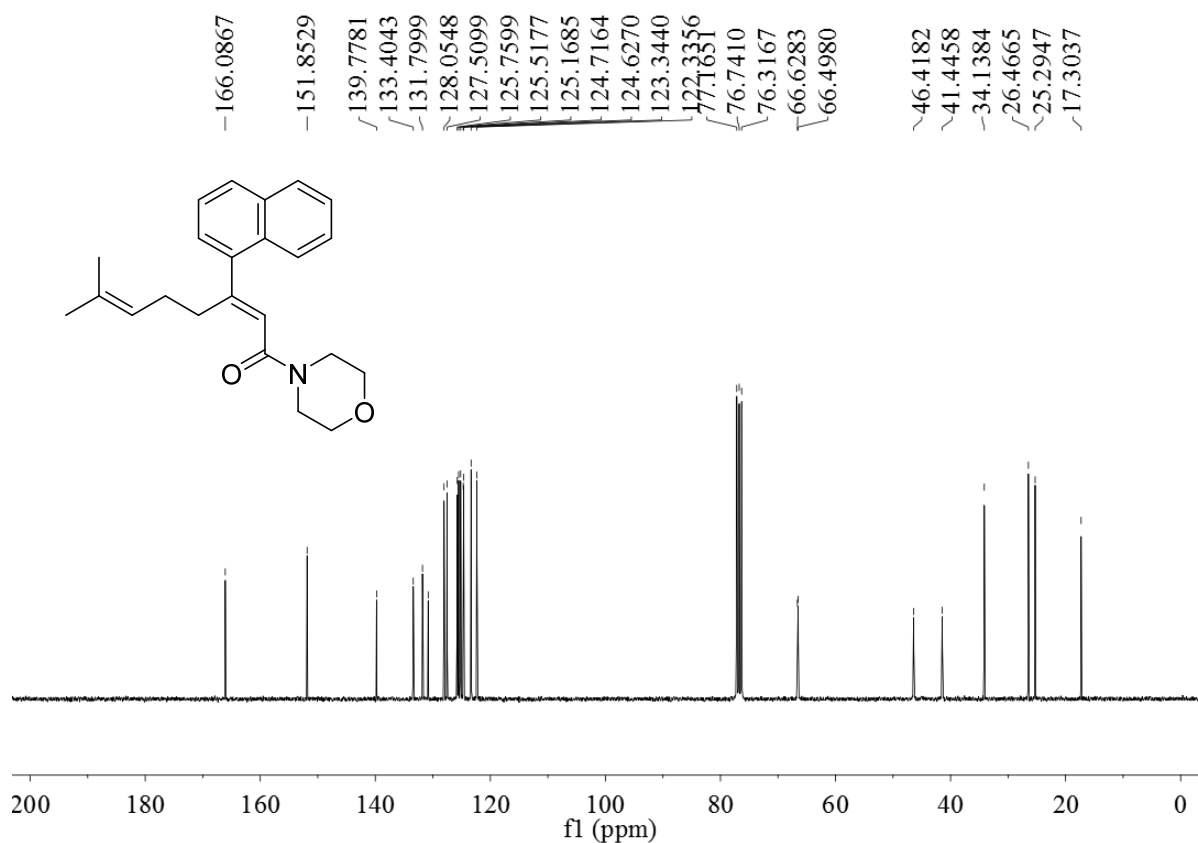

Figure S10. <sup>13</sup>C NMR spectrum of 10e

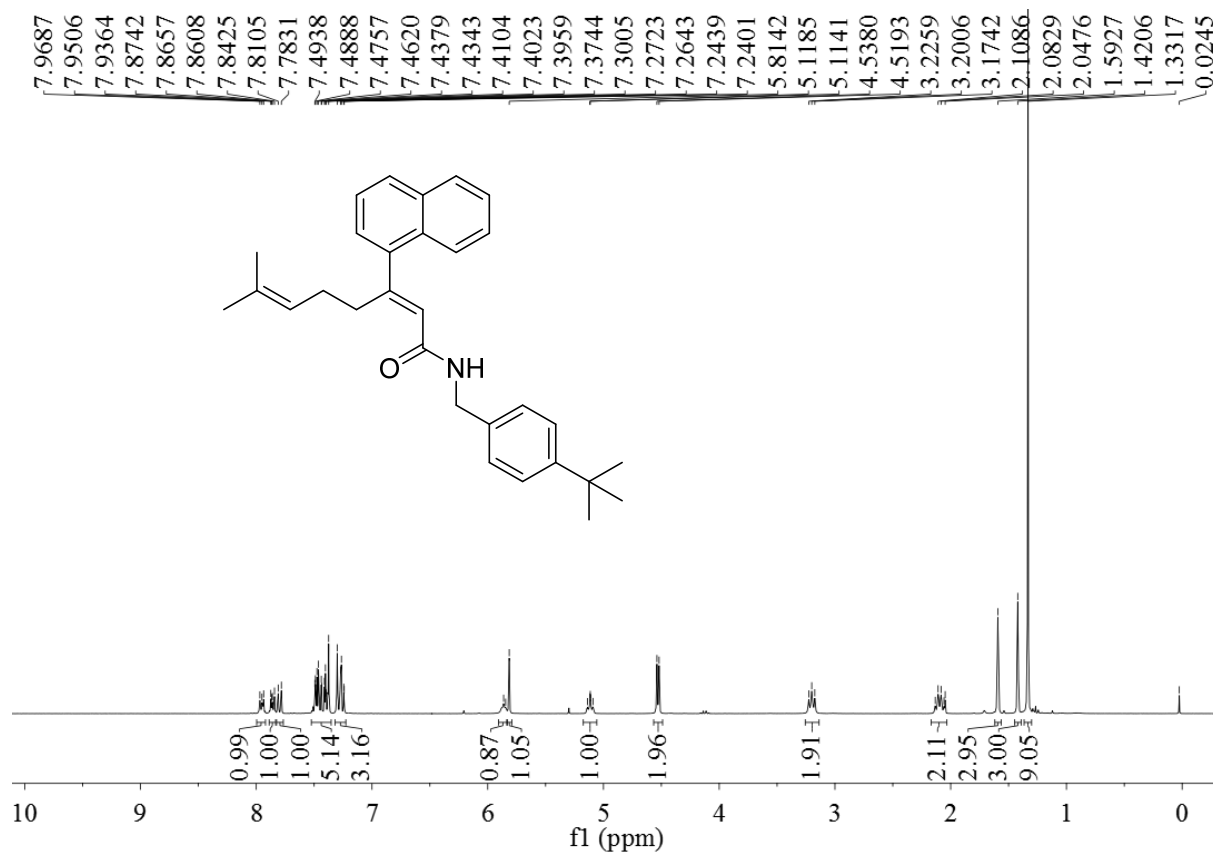

Figure S11. <sup>1</sup>H NMR of Compound 10f

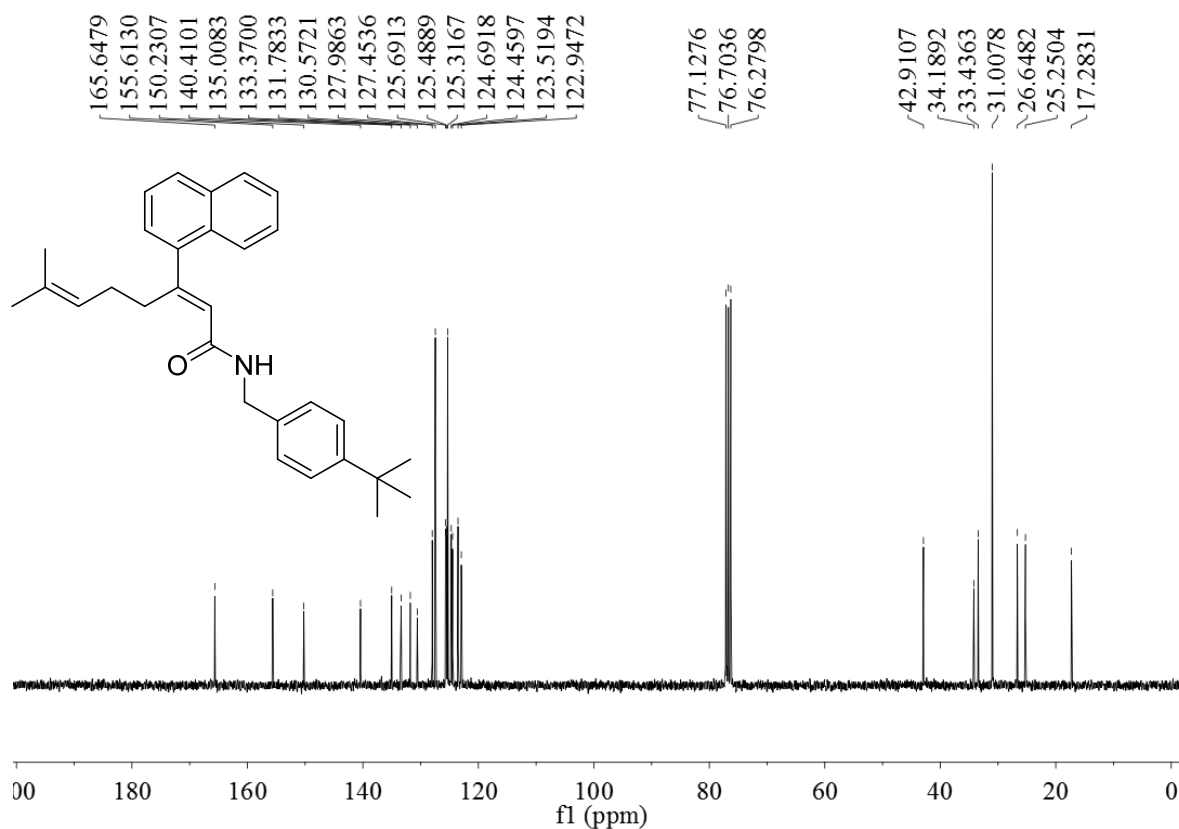

Figure S12. <sup>13</sup>C NMR spectrum of 10f

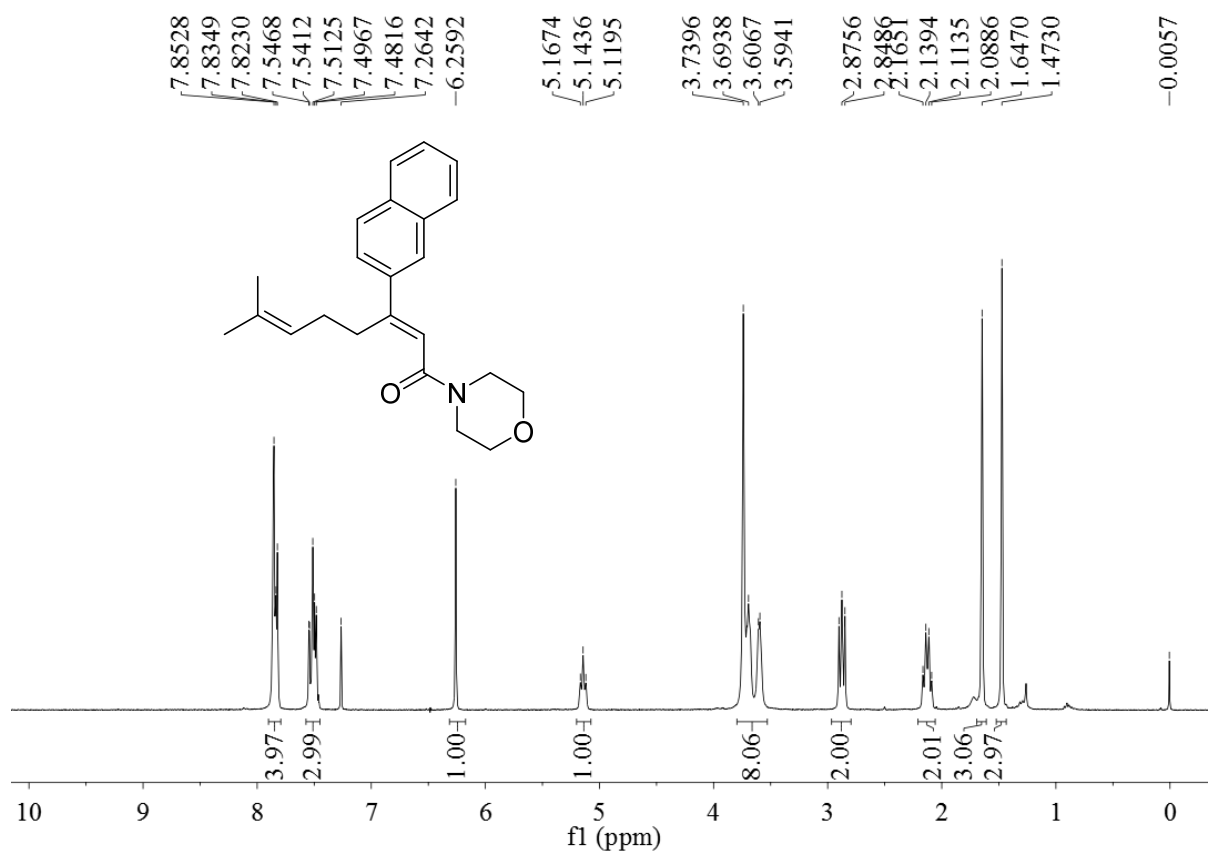

**Figure S13.** <sup>1</sup>H NMR of Compound 10g

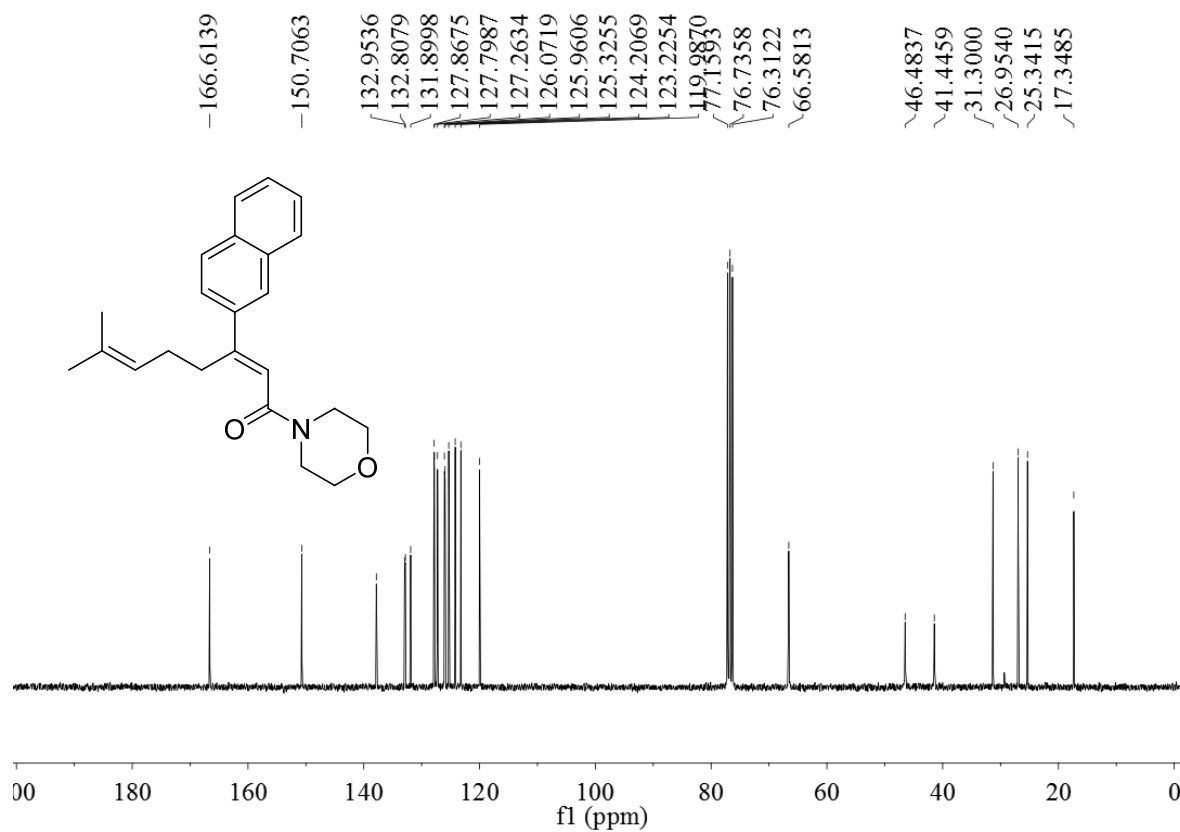

**Figure S14.** <sup>13</sup>C NMR spectrum of 10g

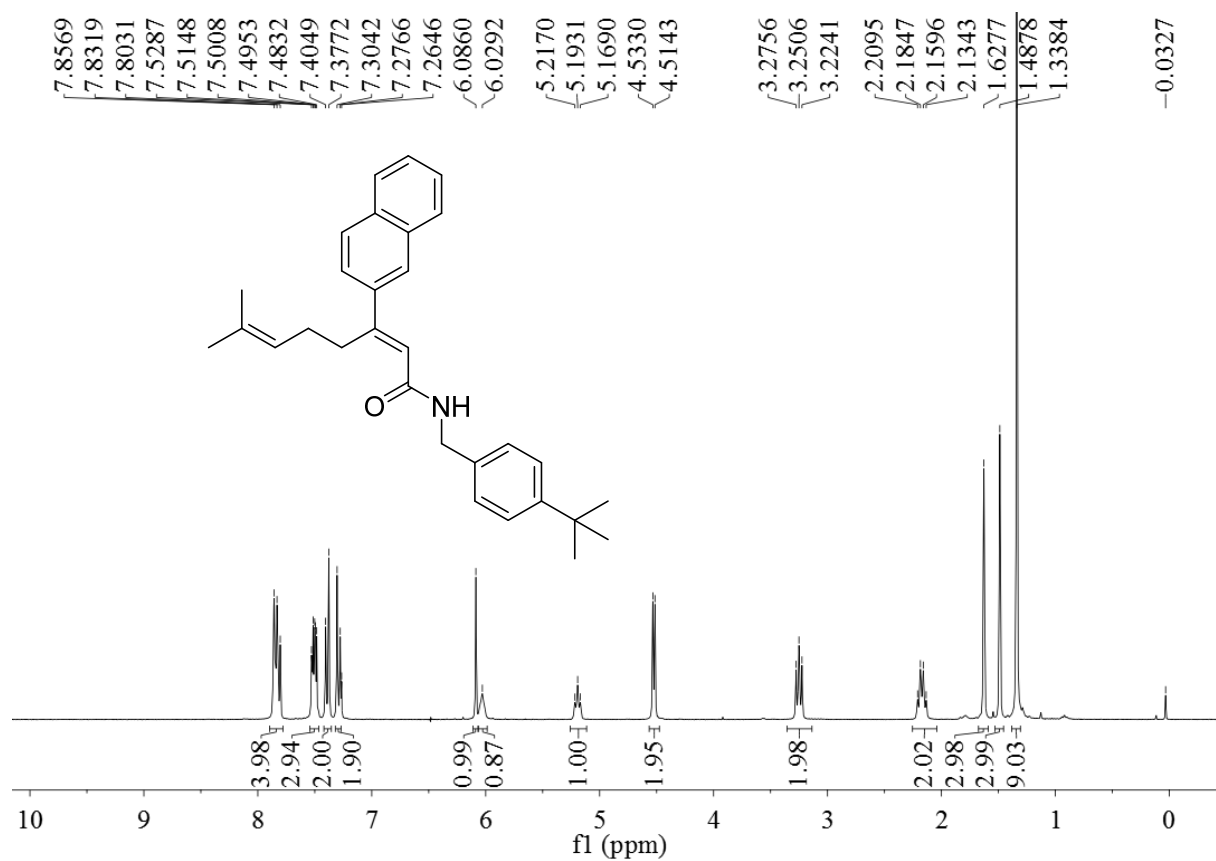

Figure S15. <sup>1</sup>H NMR of Compound 10h

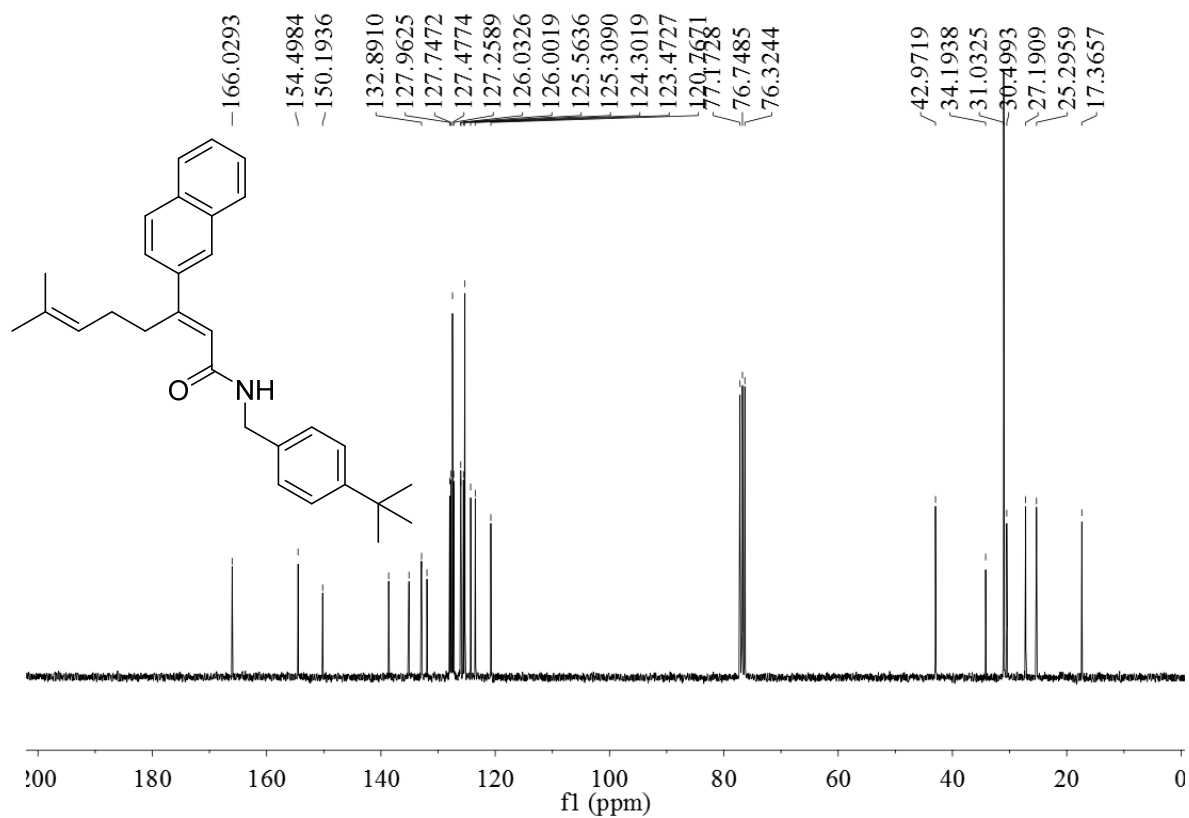

Figure S16. <sup>13</sup>C NMR spectrum of 10h

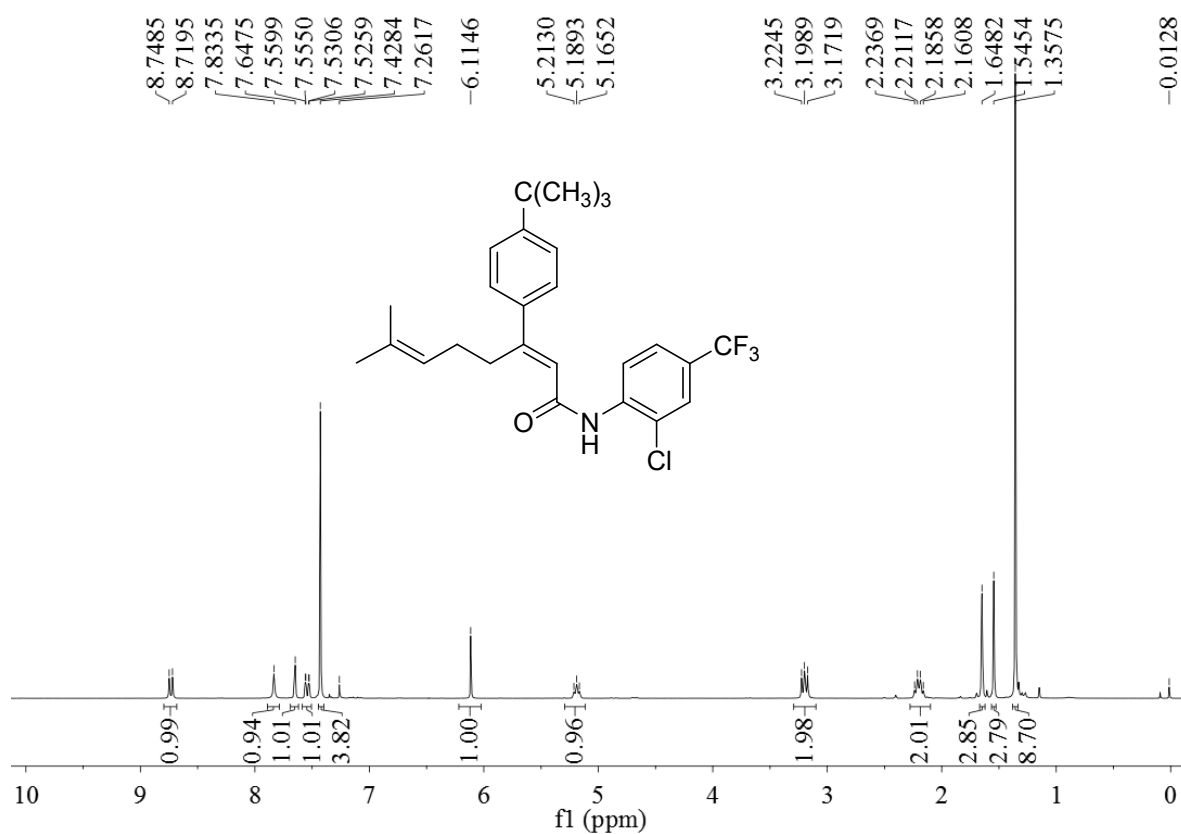

Figure S17. <sup>1</sup>H NMR of Compound 10i

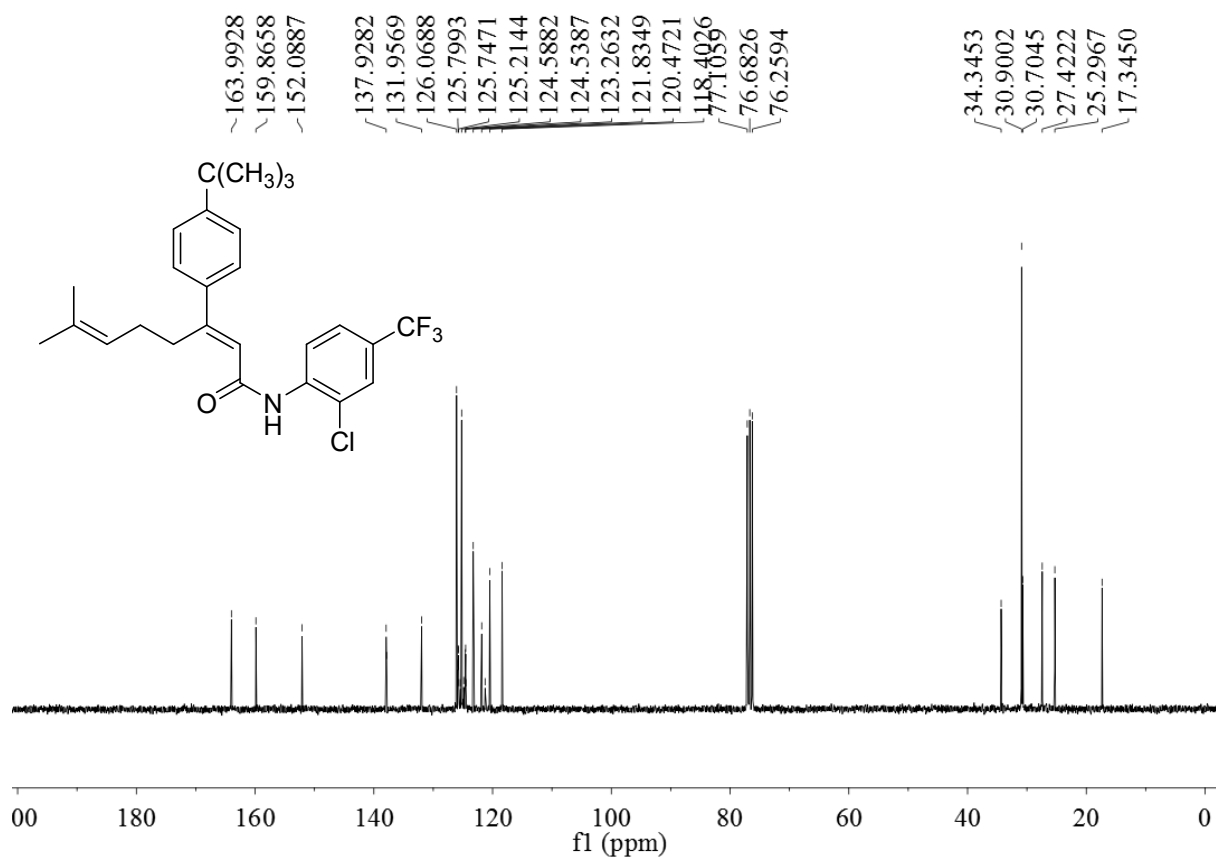

Figure S18. <sup>13</sup>C NMR spectrum of 10i

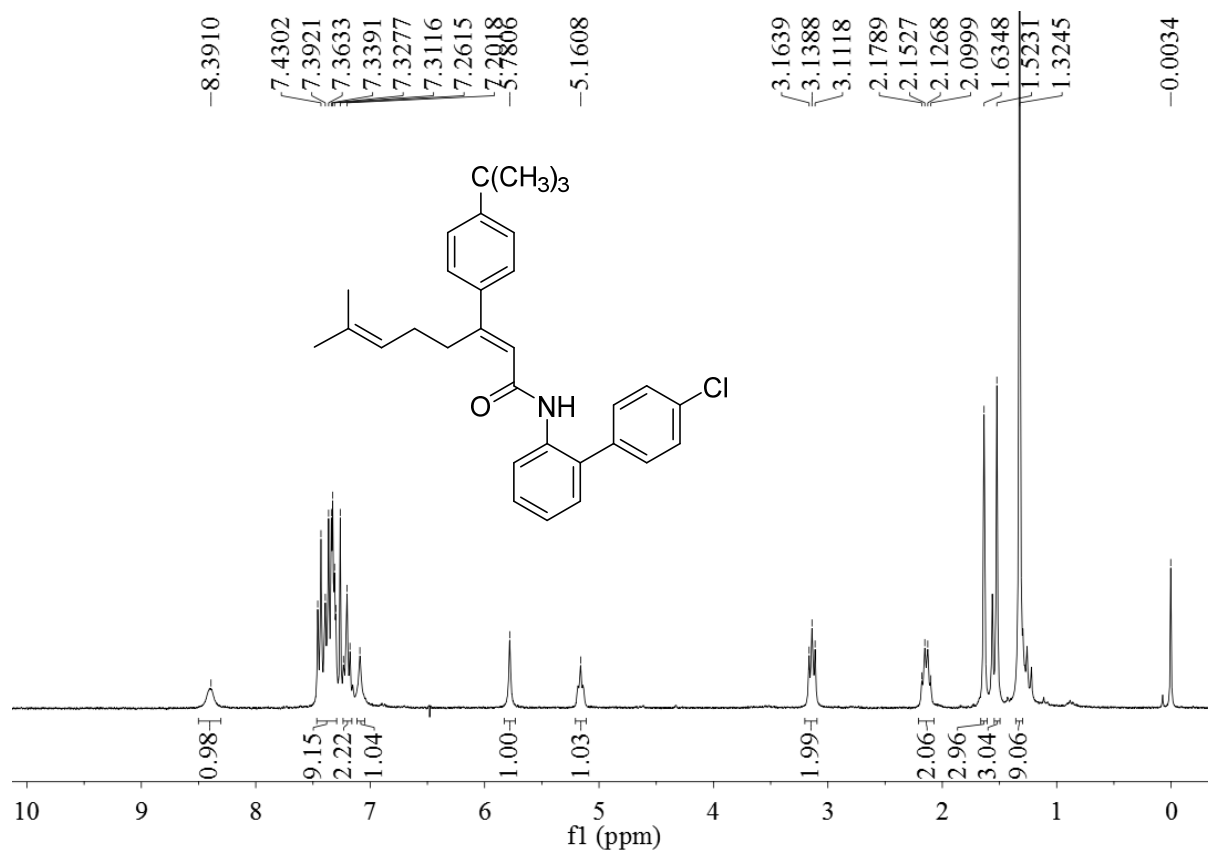

Figure S19. <sup>1</sup>H NMR of Compound 10j

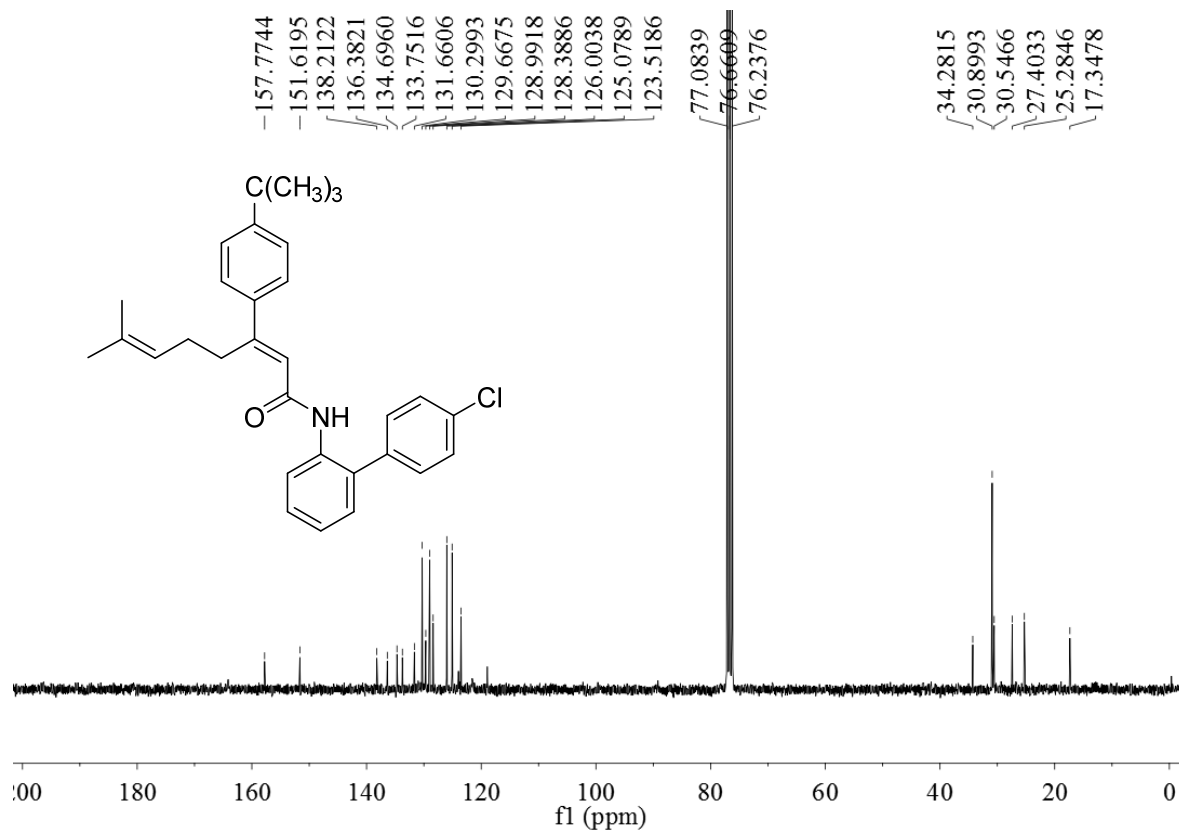

Figure S20. <sup>13</sup>C NMR spectrum of 10j

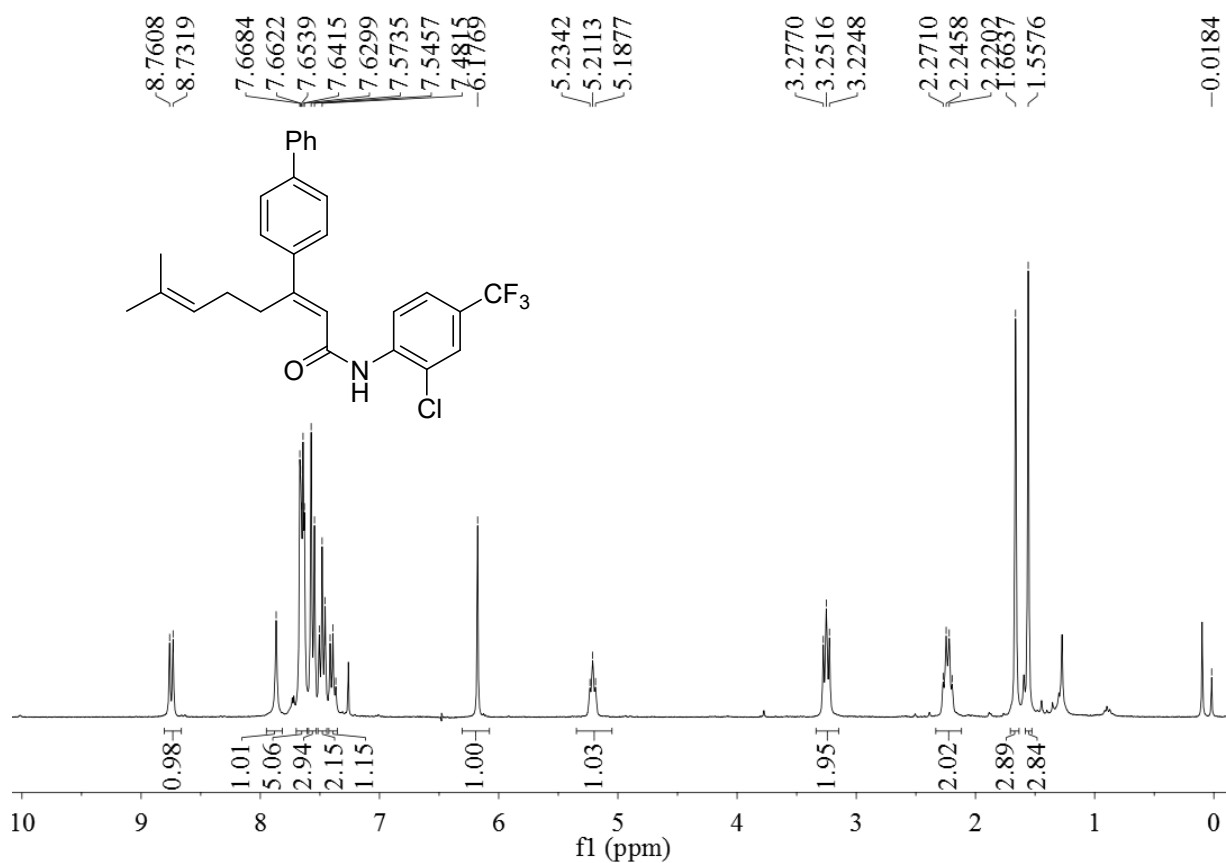

Figure S21. <sup>1</sup>H NMR of Compound 10k

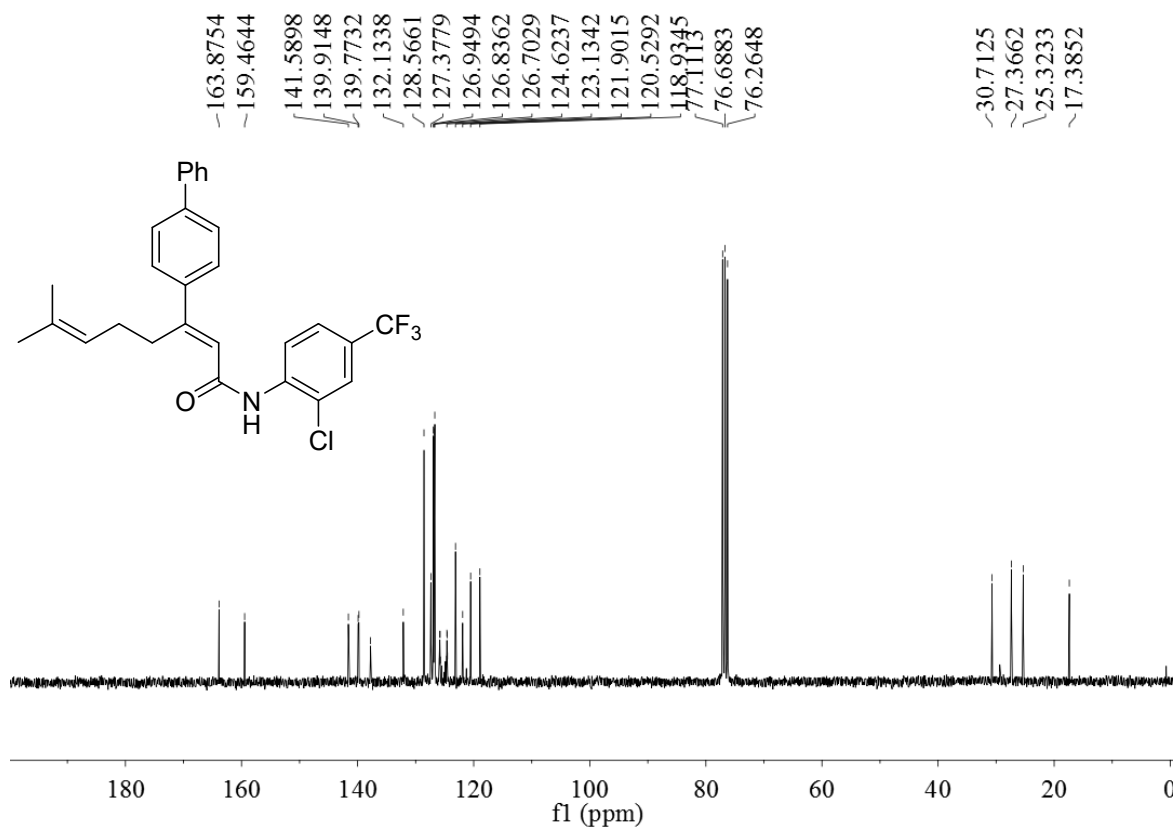

Figure S22. <sup>13</sup>C NMR spectrum of 10k

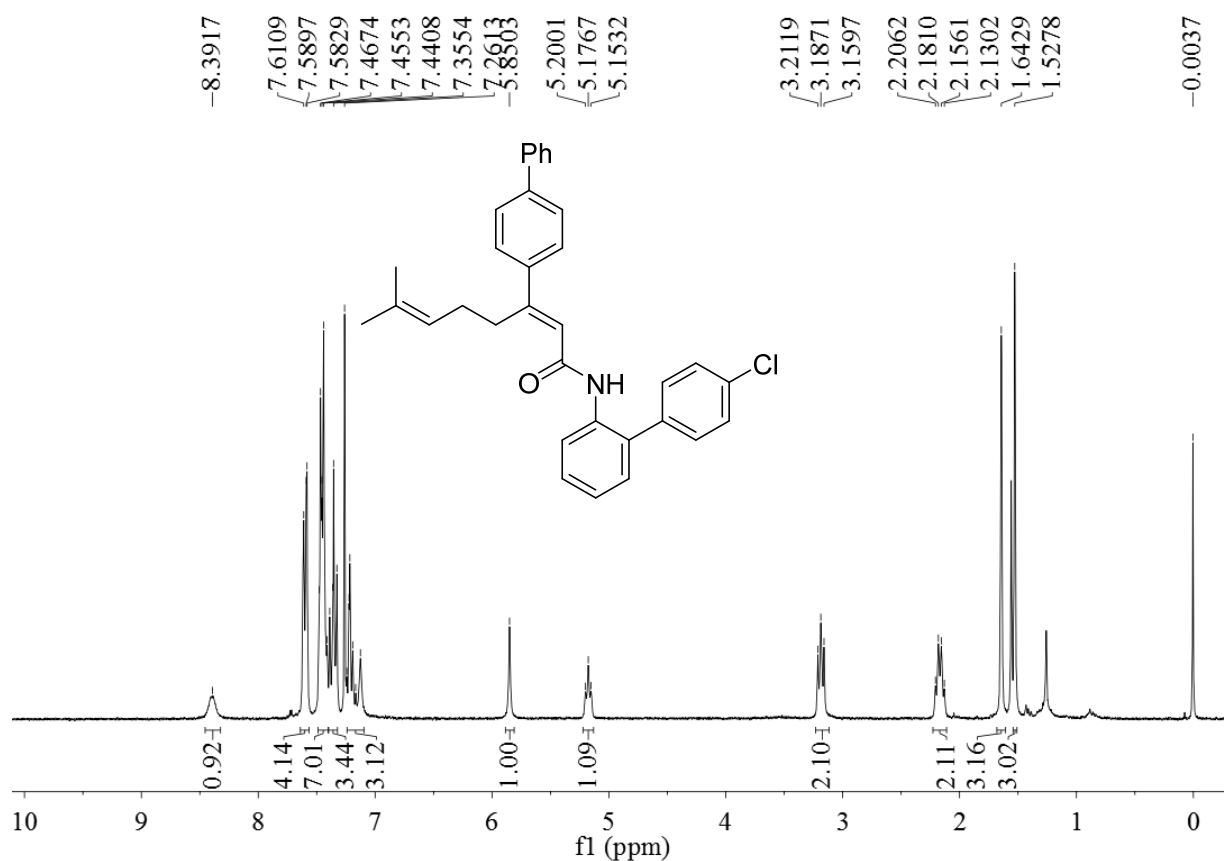

Figure S23. <sup>1</sup>H NMR of Compound 10l

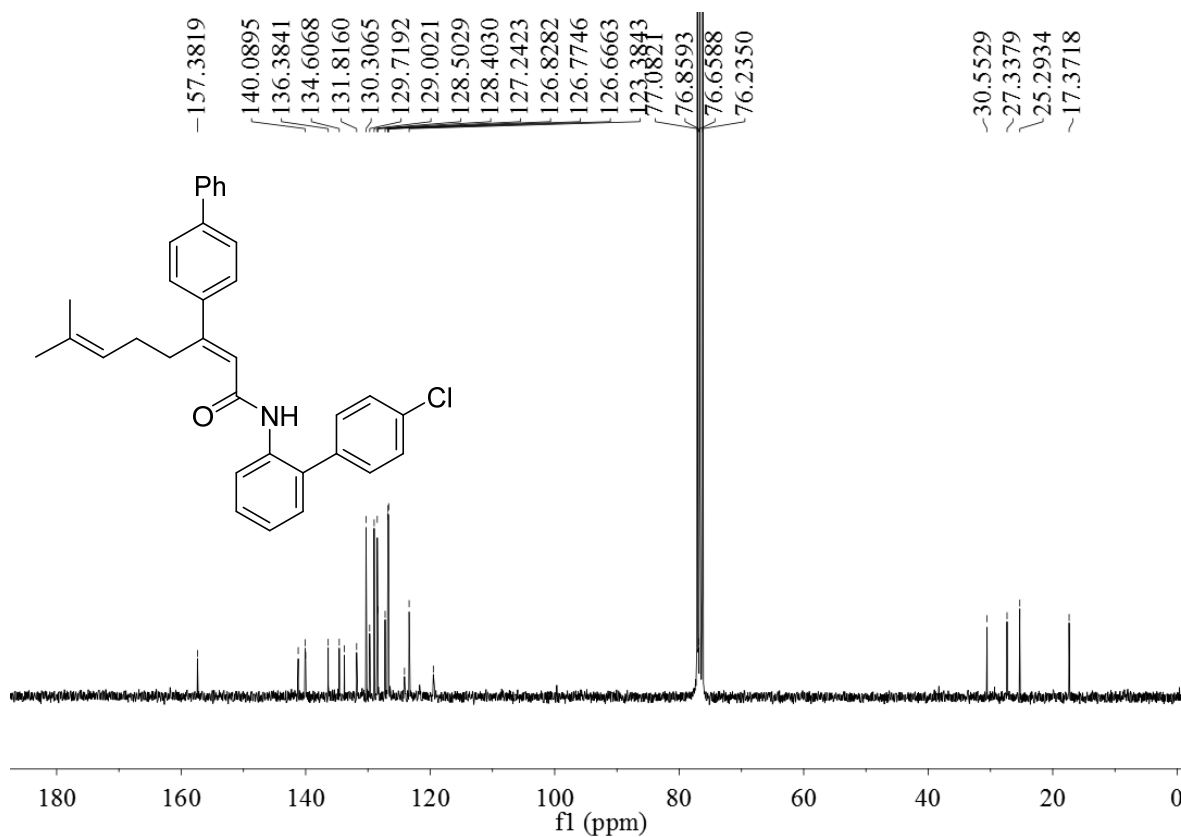

Figure S24. <sup>13</sup>C NMR spectrum of 10l

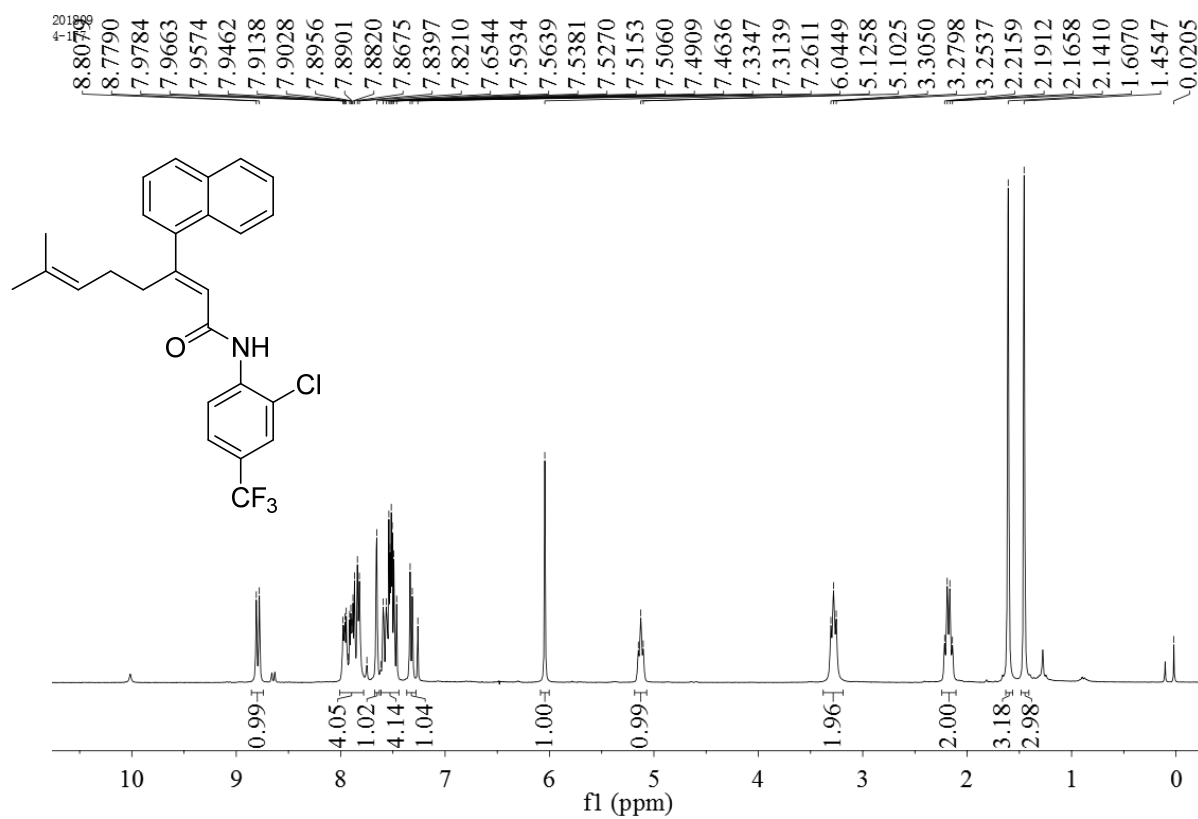

Figure S25.  $^1\text{H}$  NMR of Compound 10m

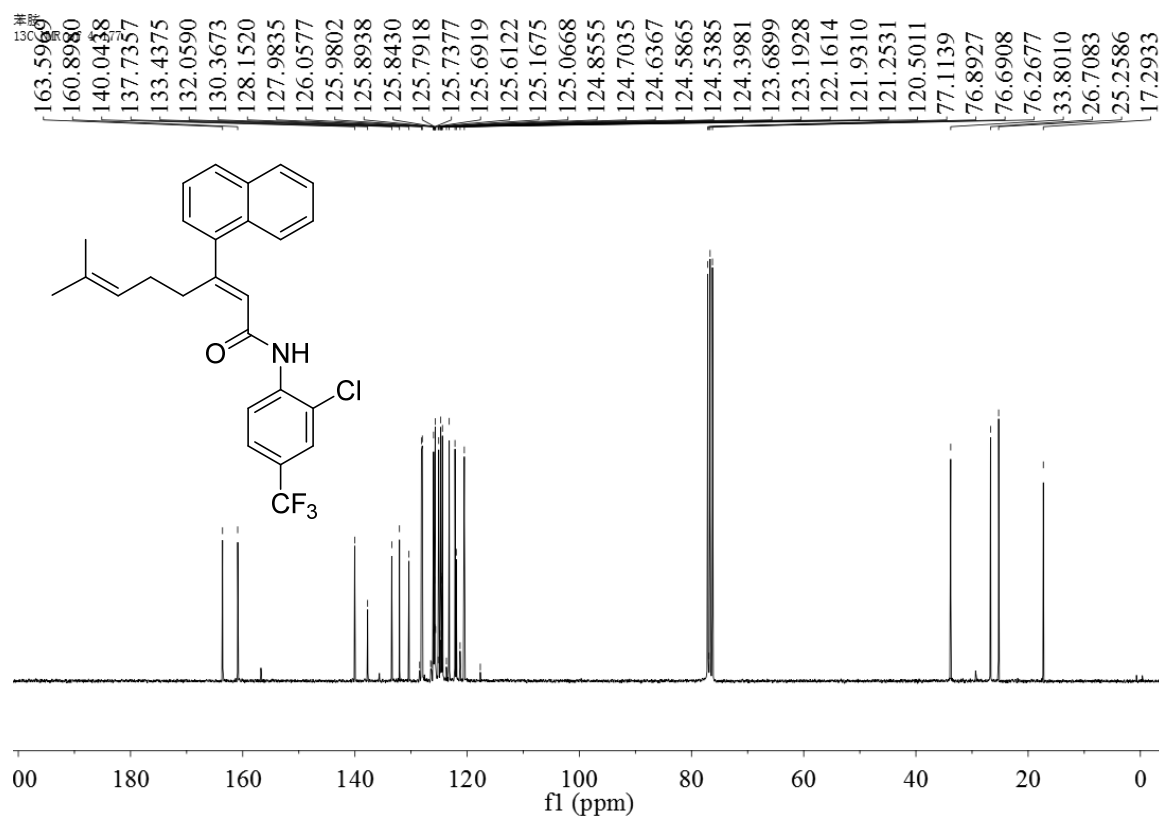

Figure S26.  $^{13}\text{C}$  NMR spectrum of 10m

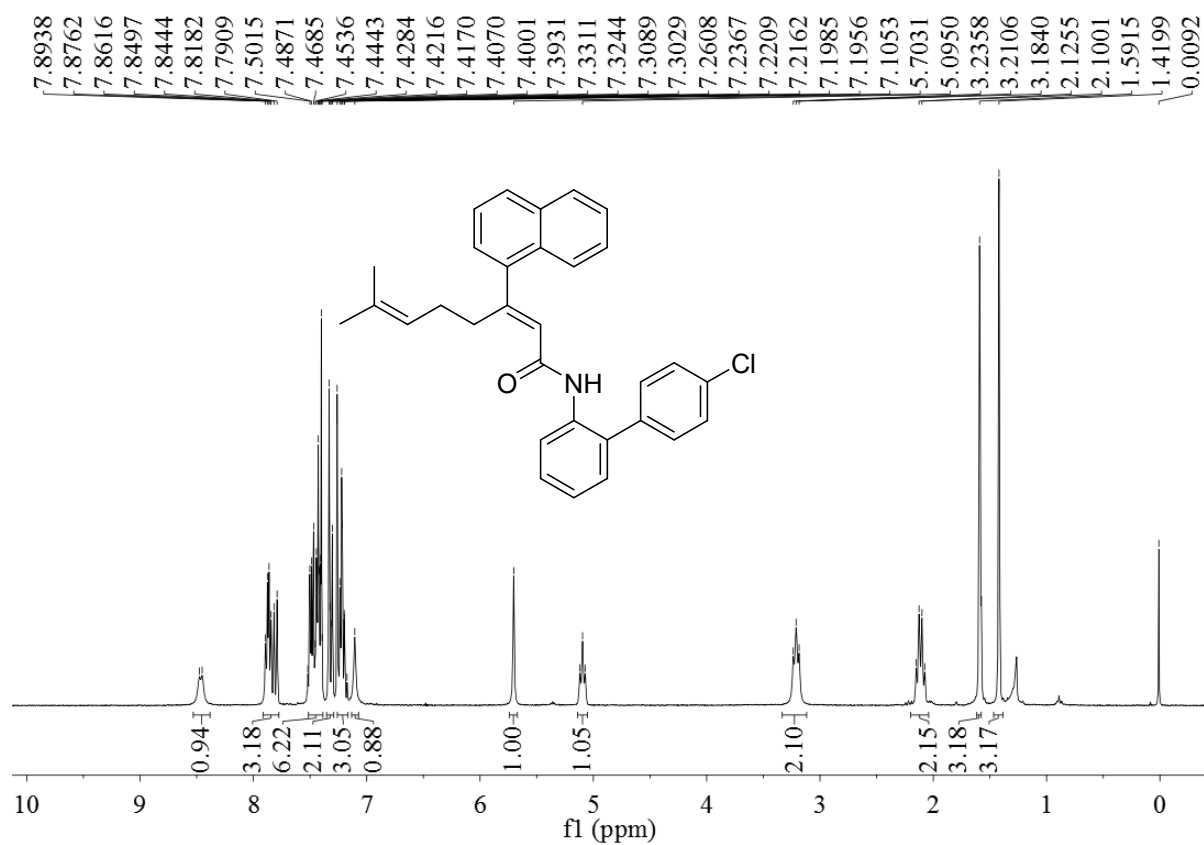

Figure S27. <sup>1</sup>H NMR of Compound 10n

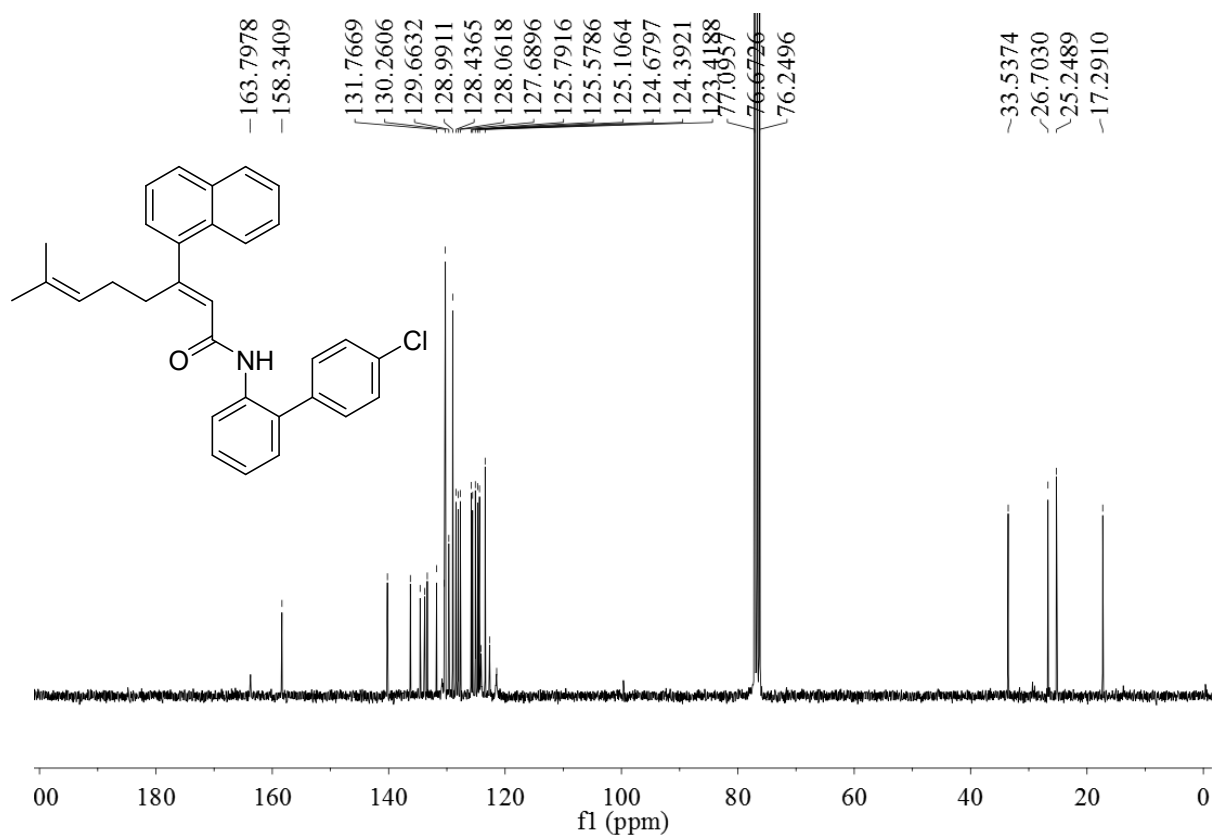

Figure S28. <sup>13</sup>C NMR spectrum of 10n

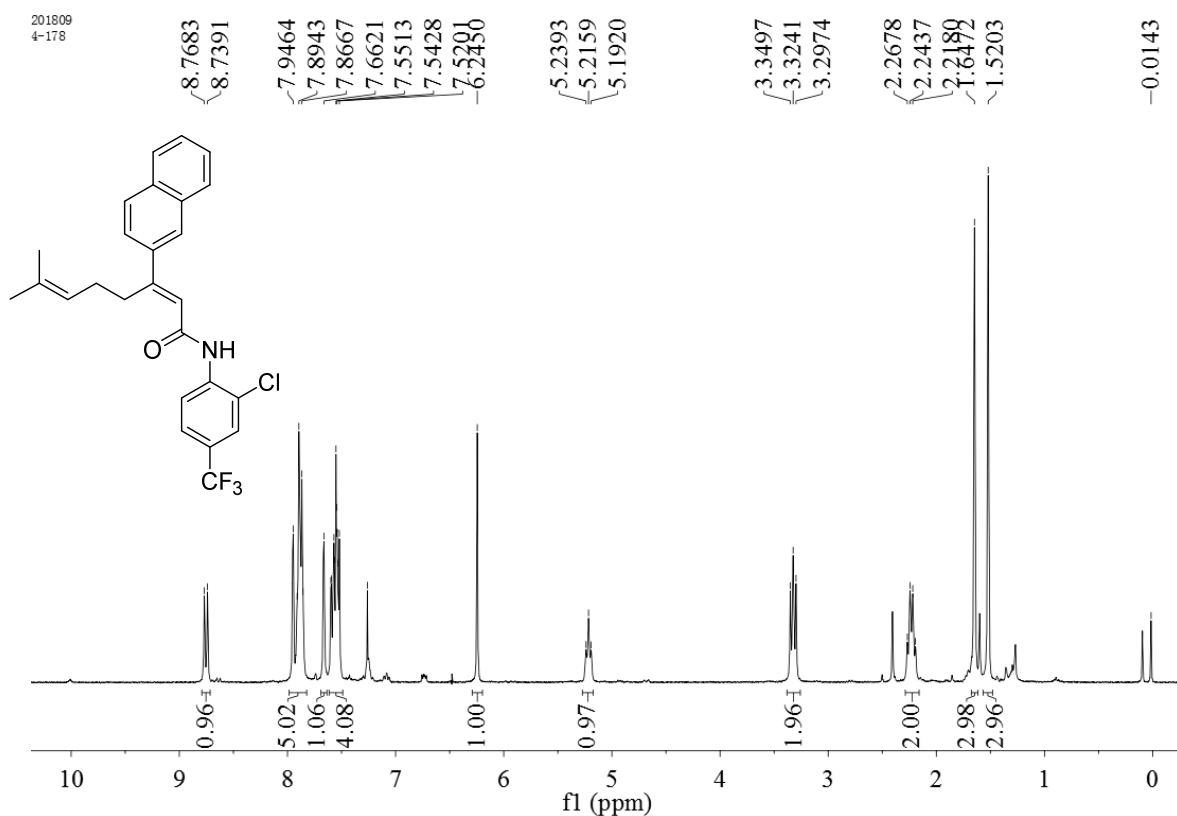

Figure S29. <sup>1</sup>H NMR of Compound 10o

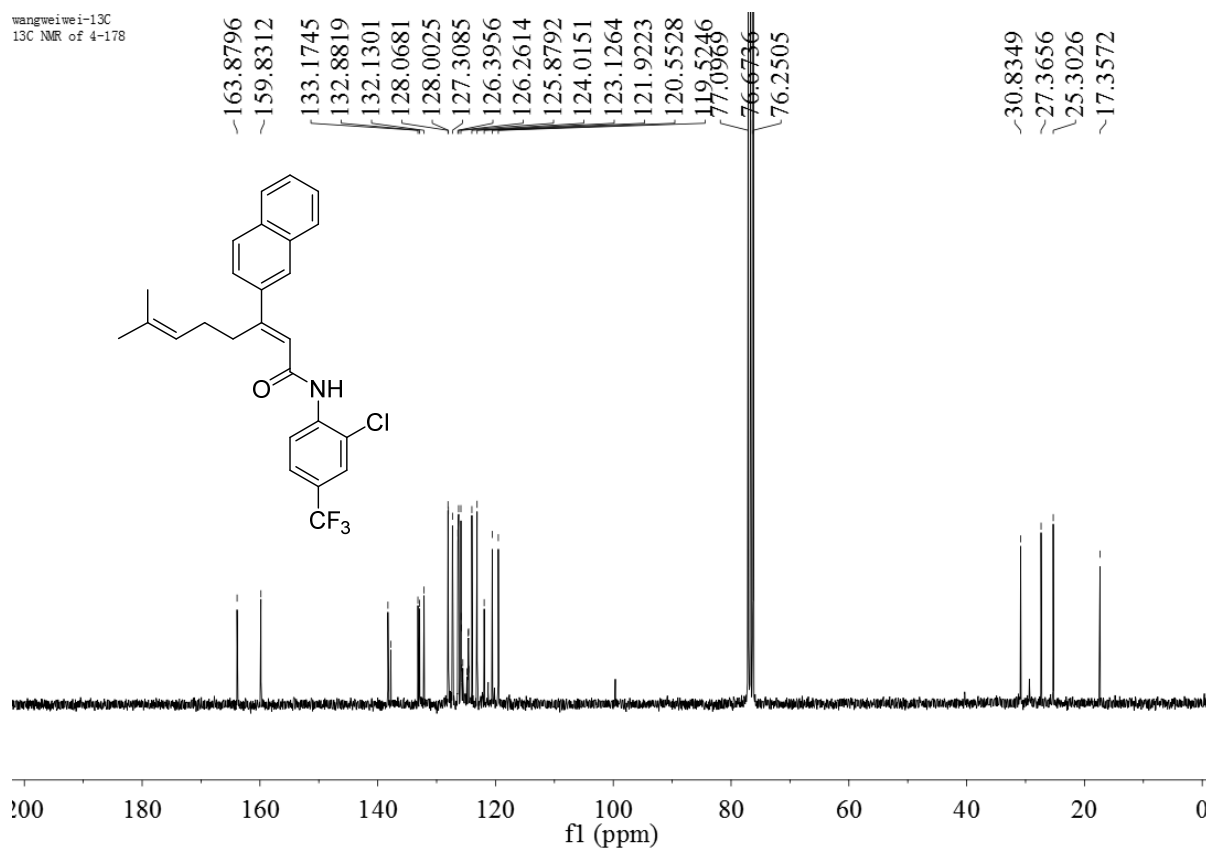

Figure S30. <sup>13</sup>C NMR spectrum of 10o

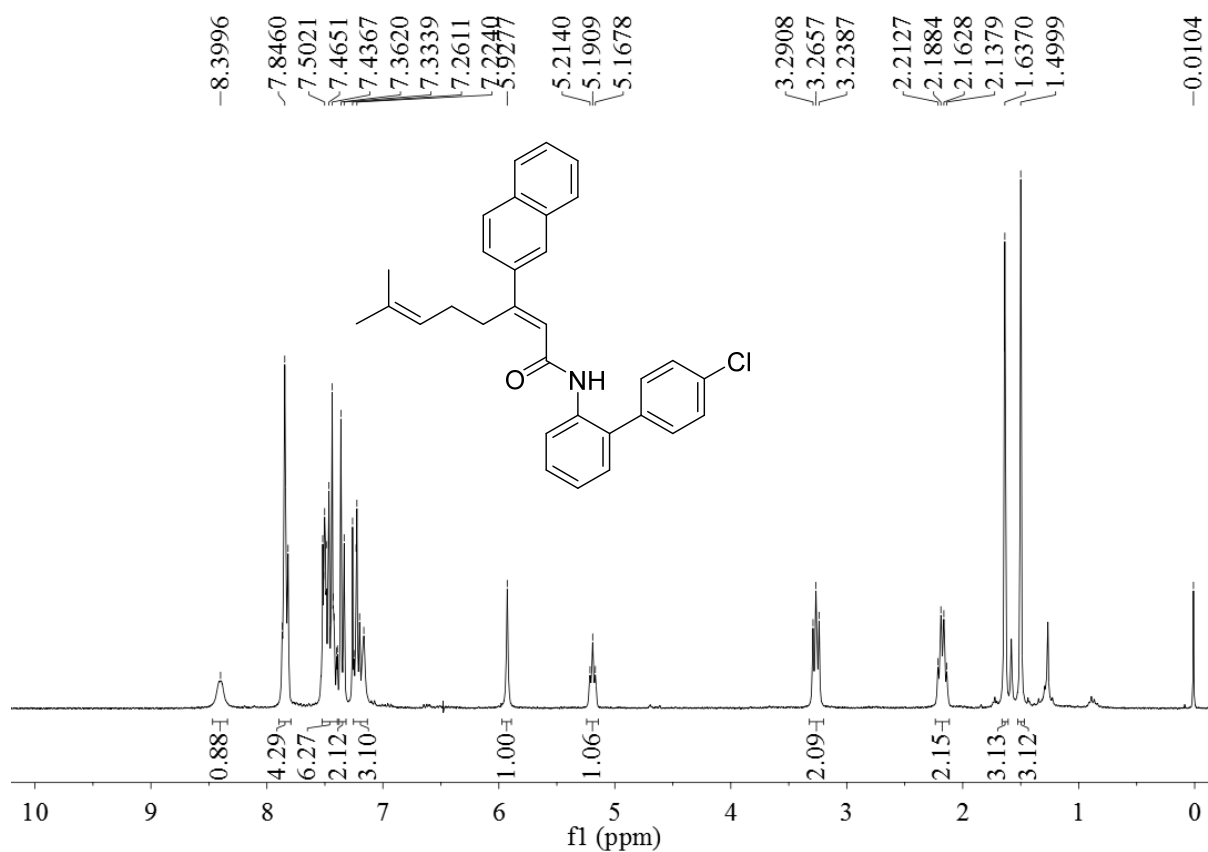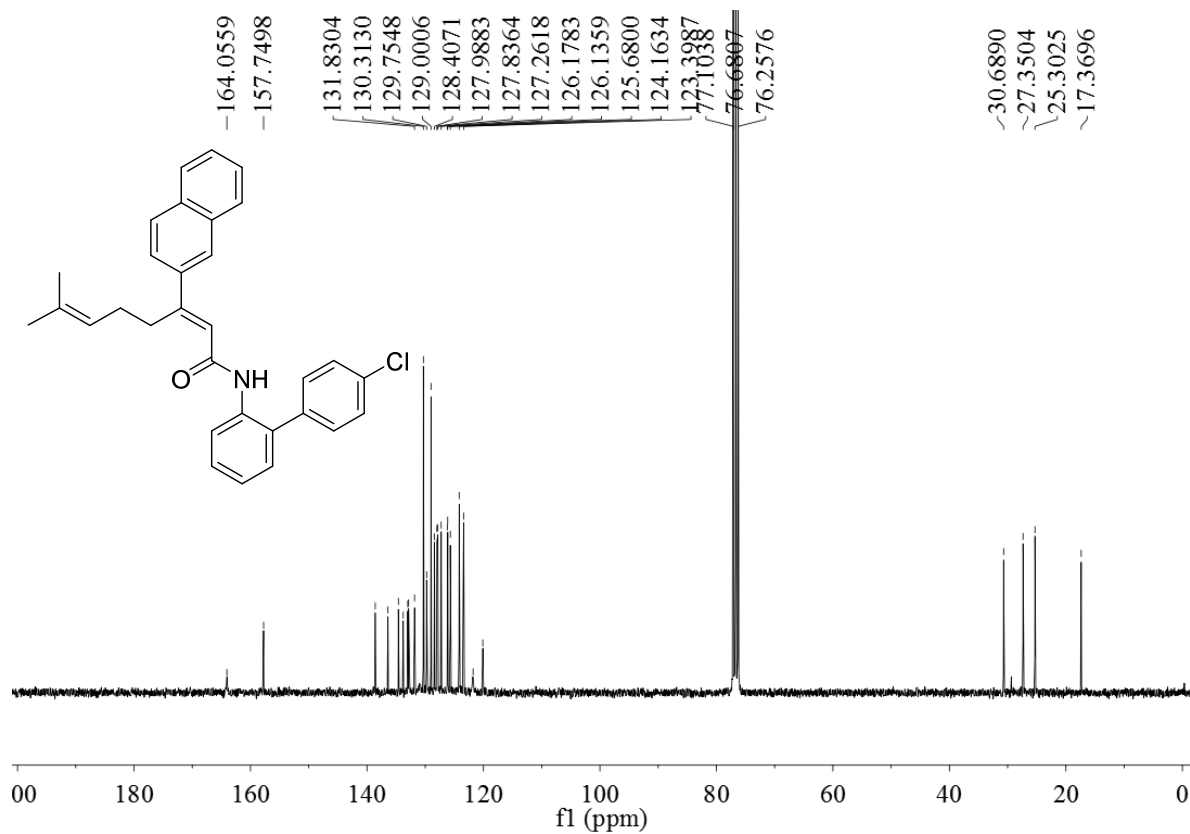

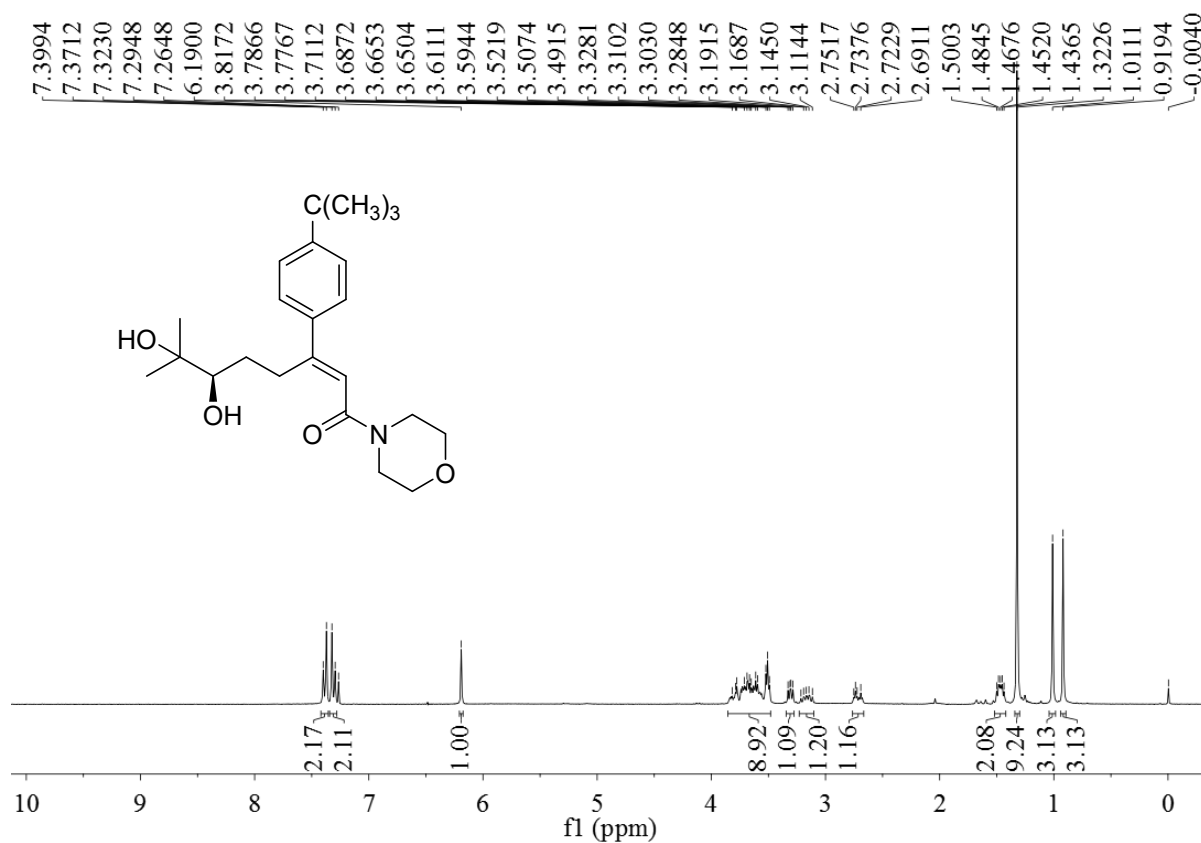

Figure S33. <sup>1</sup>H NMR of Compound (R)-11a

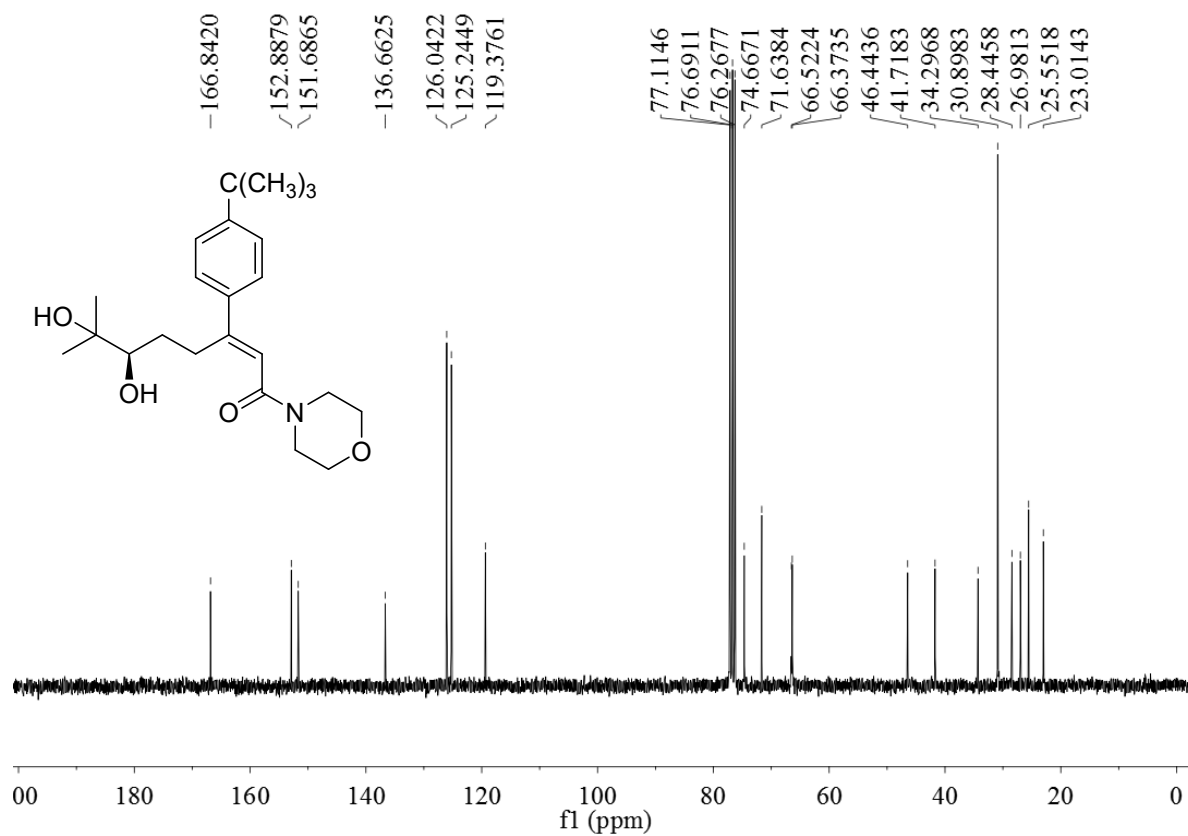

Figure S34. <sup>13</sup>C NMR spectrum of (R)-11a

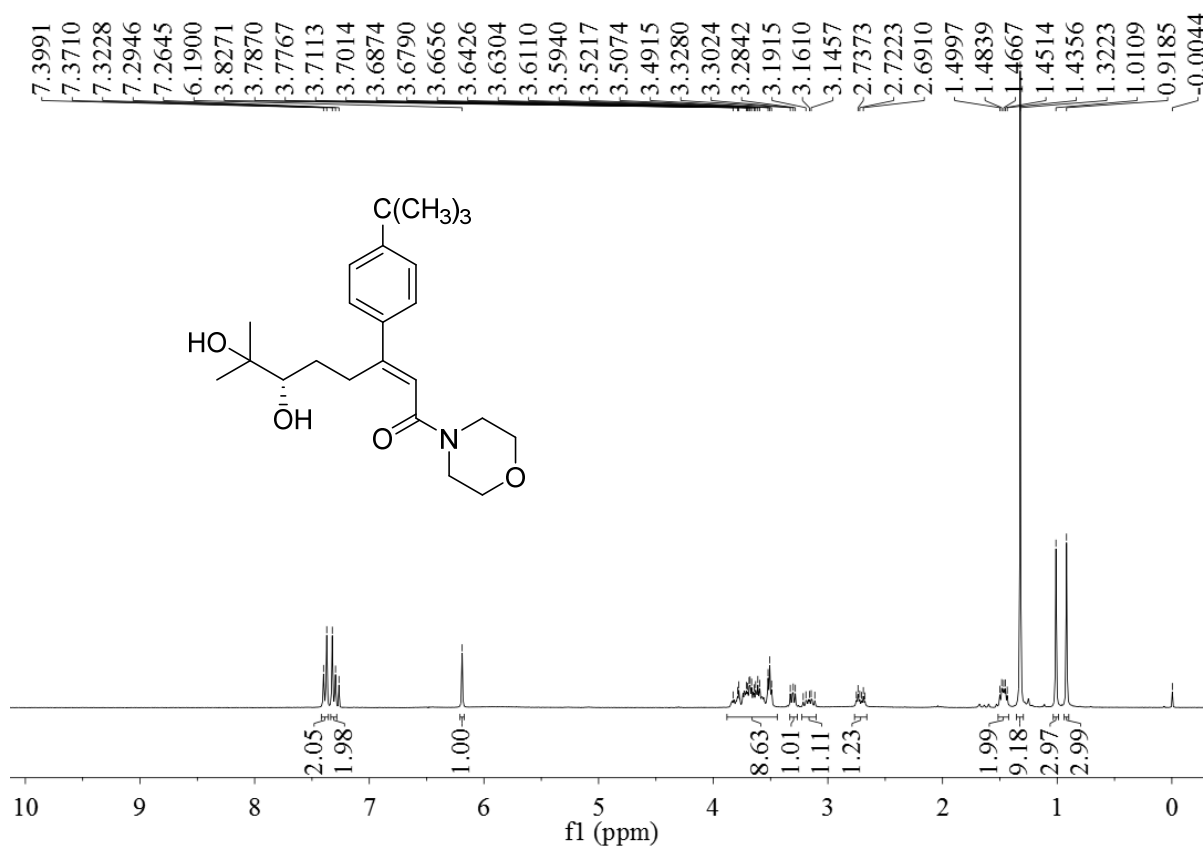

Figure S35. <sup>1</sup>H NMR of Compound (S)-11a

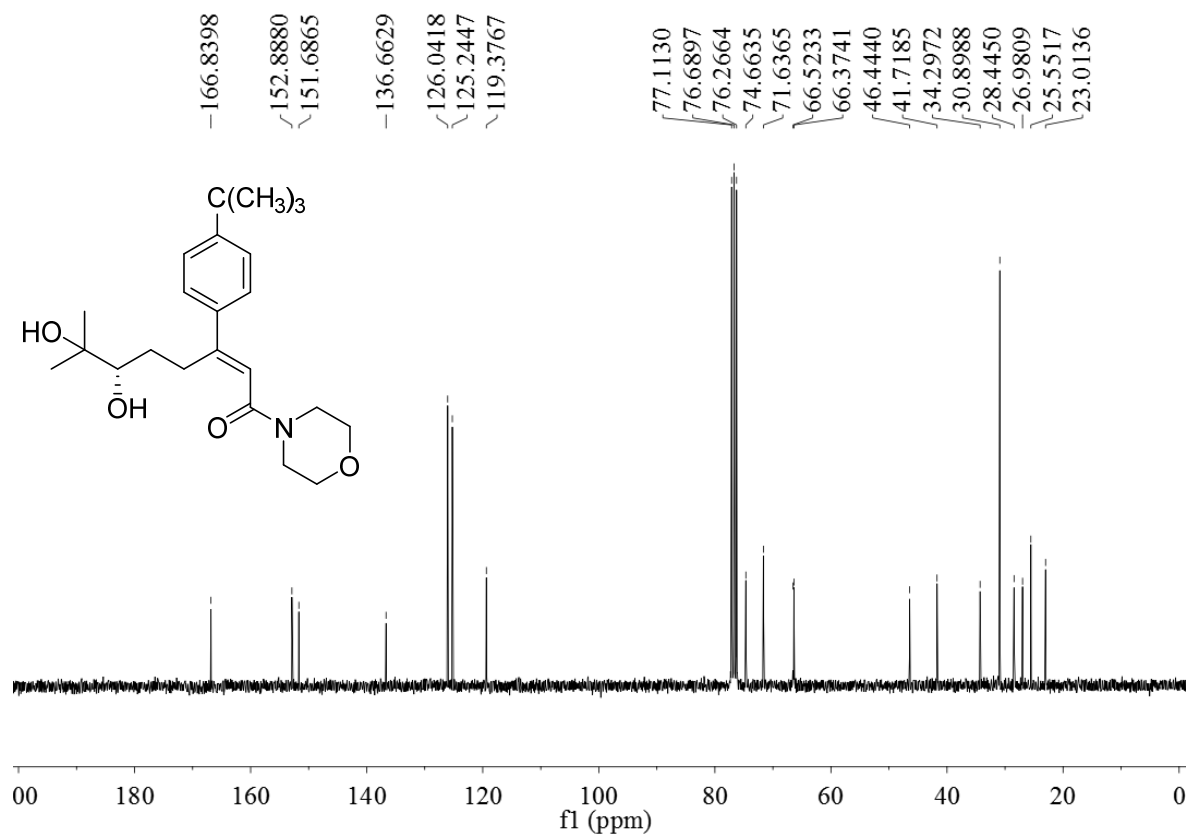

Figure S36. <sup>13</sup>C NMR spectrum of (S)-11a

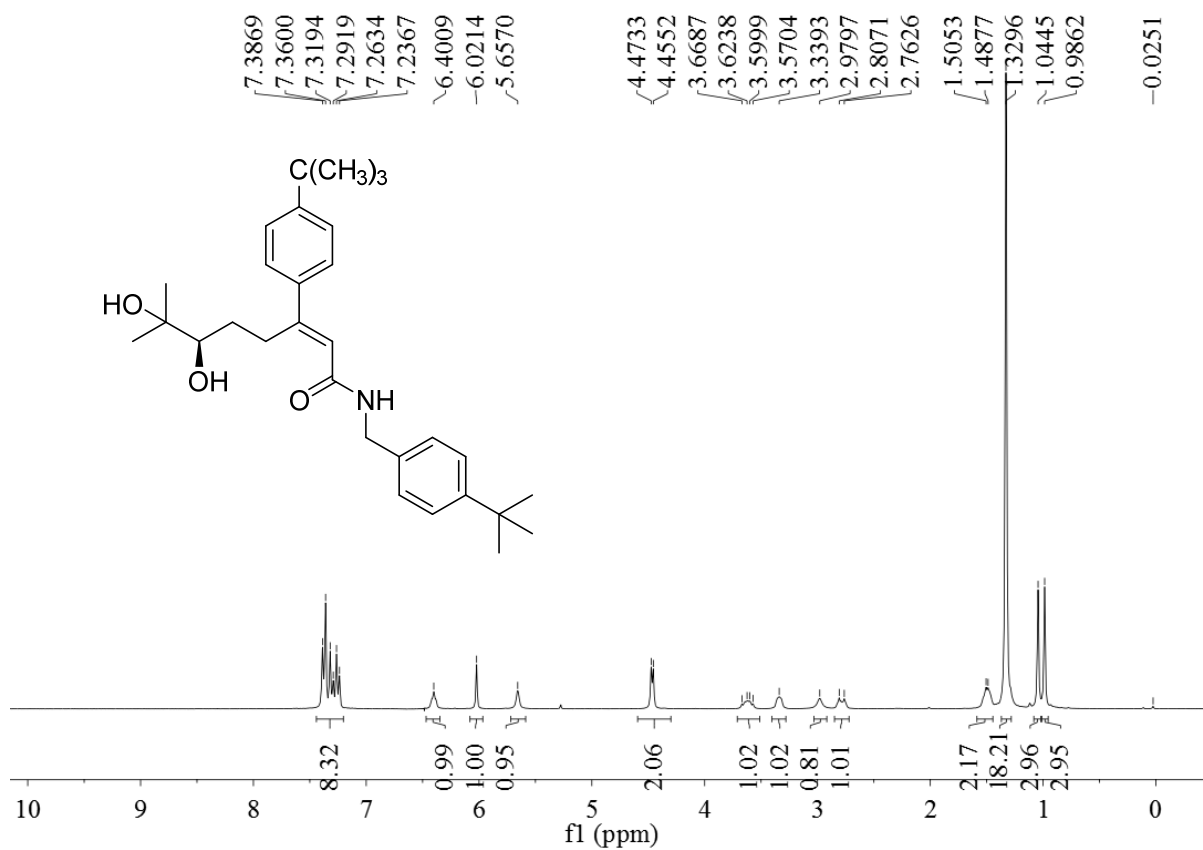

Figure S37. <sup>1</sup>H NMR of Compound (R)-11b

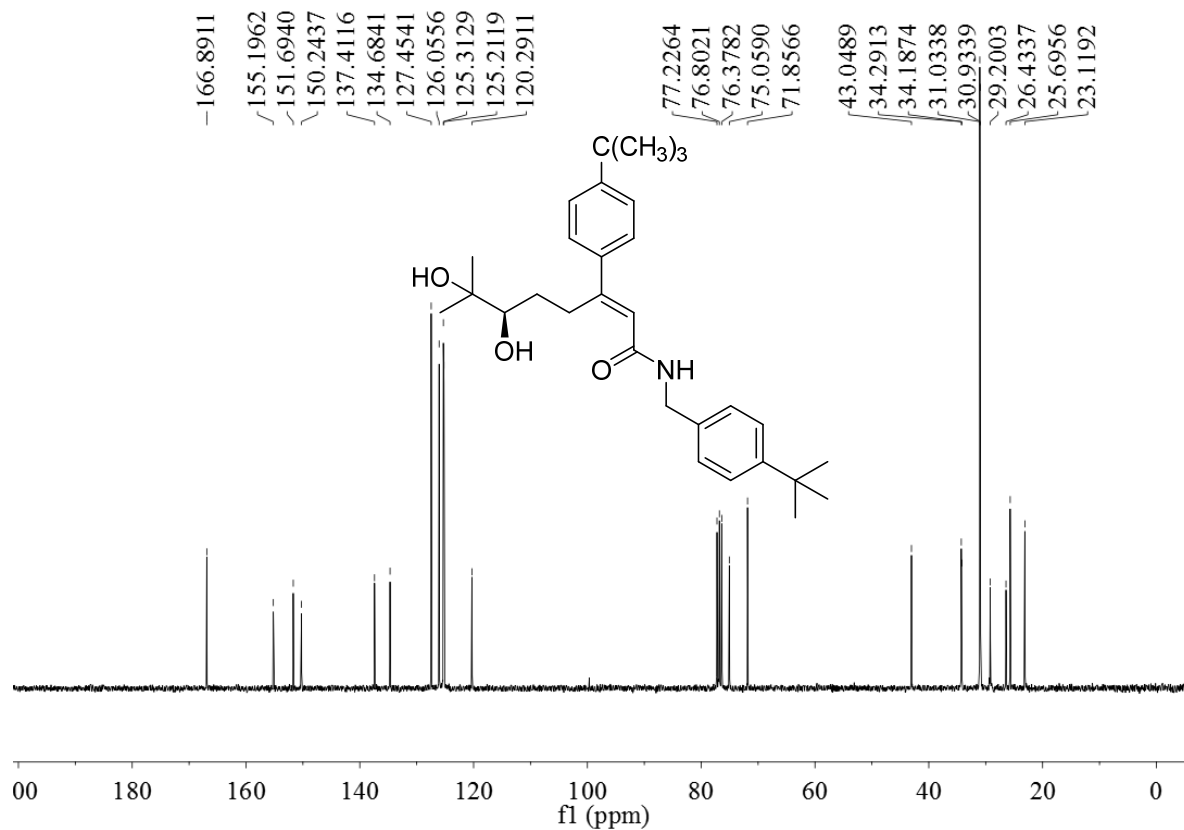

Figure S38. <sup>13</sup>C NMR spectrum of (R)-11b

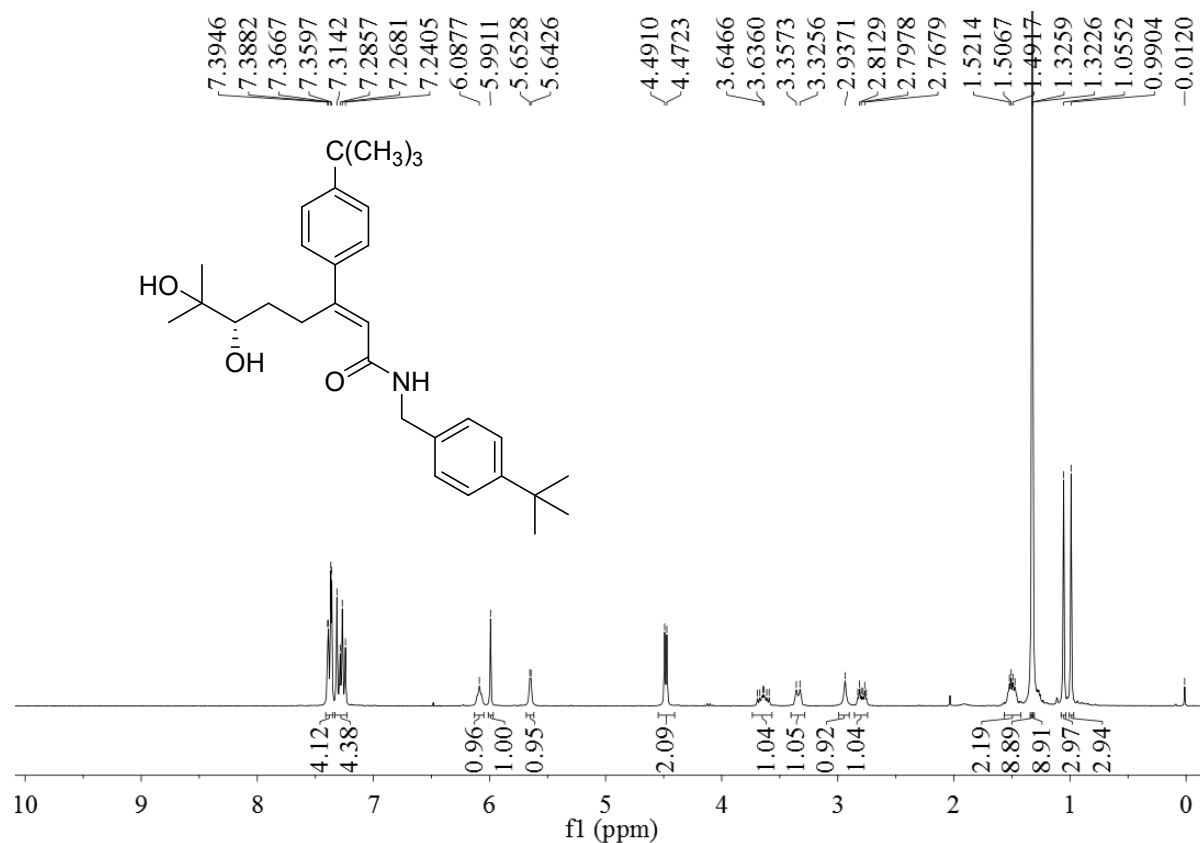

Figure S39. <sup>1</sup>H NMR of Compound (S)-11b

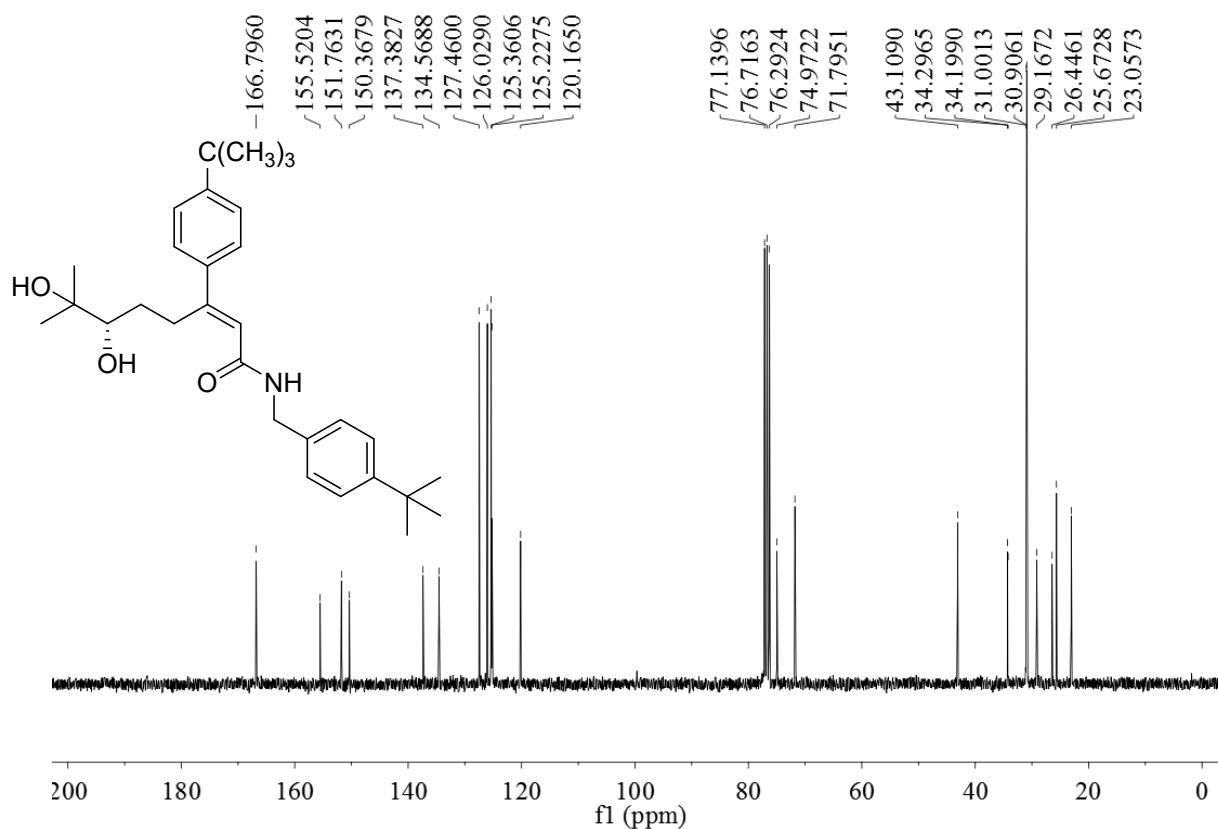

Figure S40. <sup>13</sup>C NMR spectrum of (S)-11b

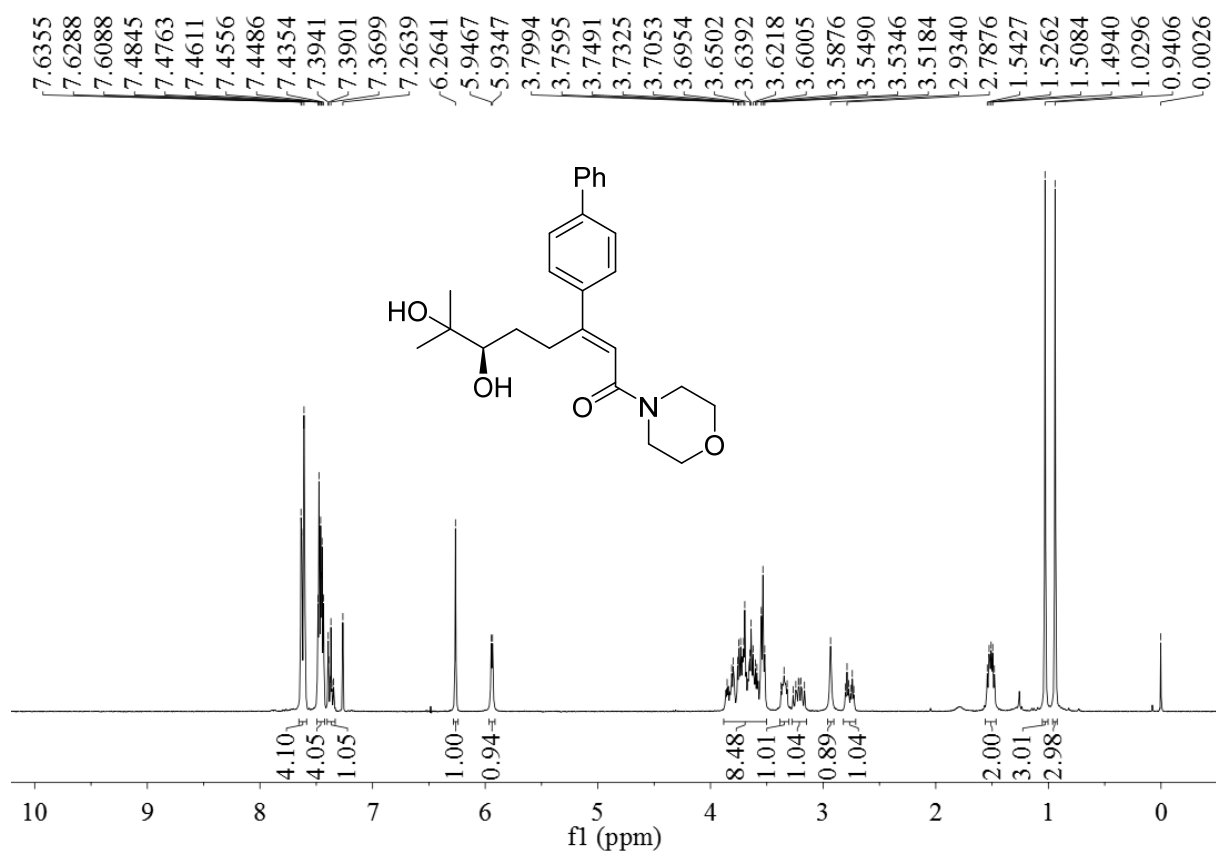

Figure S41. <sup>1</sup>H NMR of Compound (R)-11c

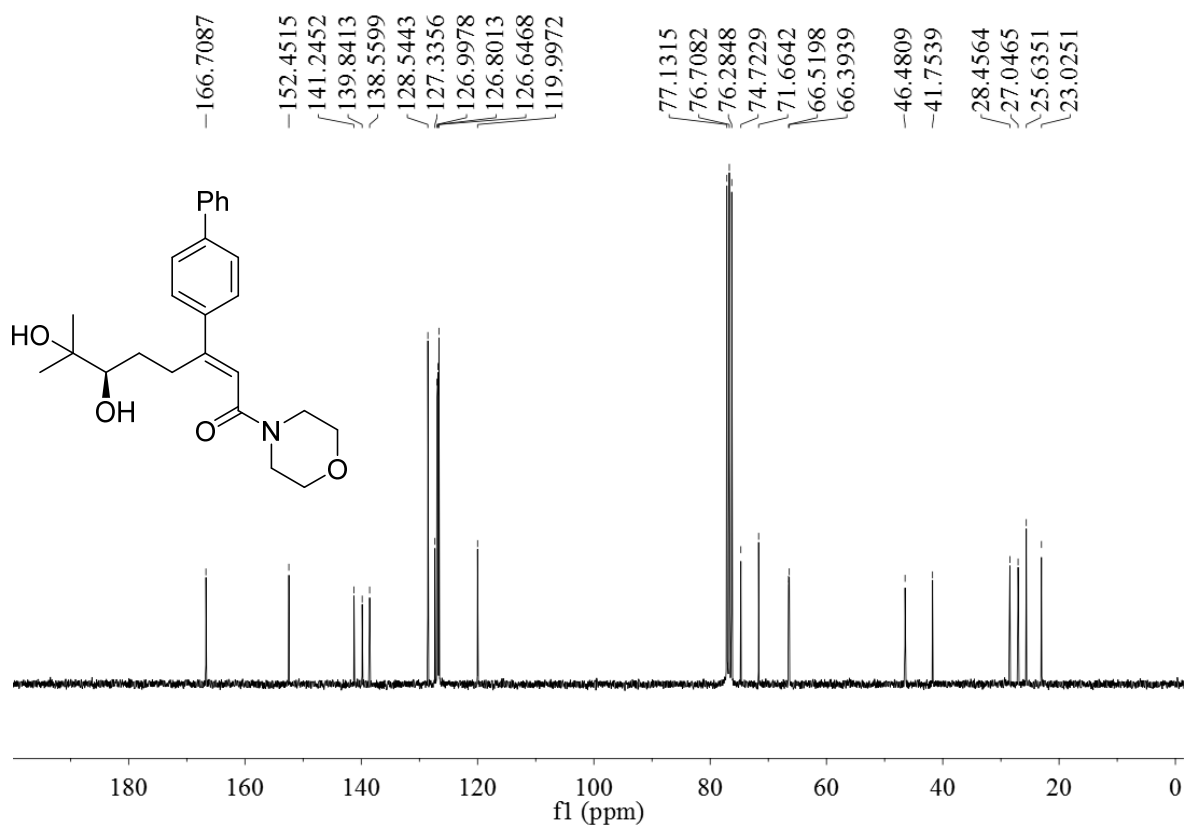

Figure S42. <sup>13</sup>C NMR spectrum of (R)-11c

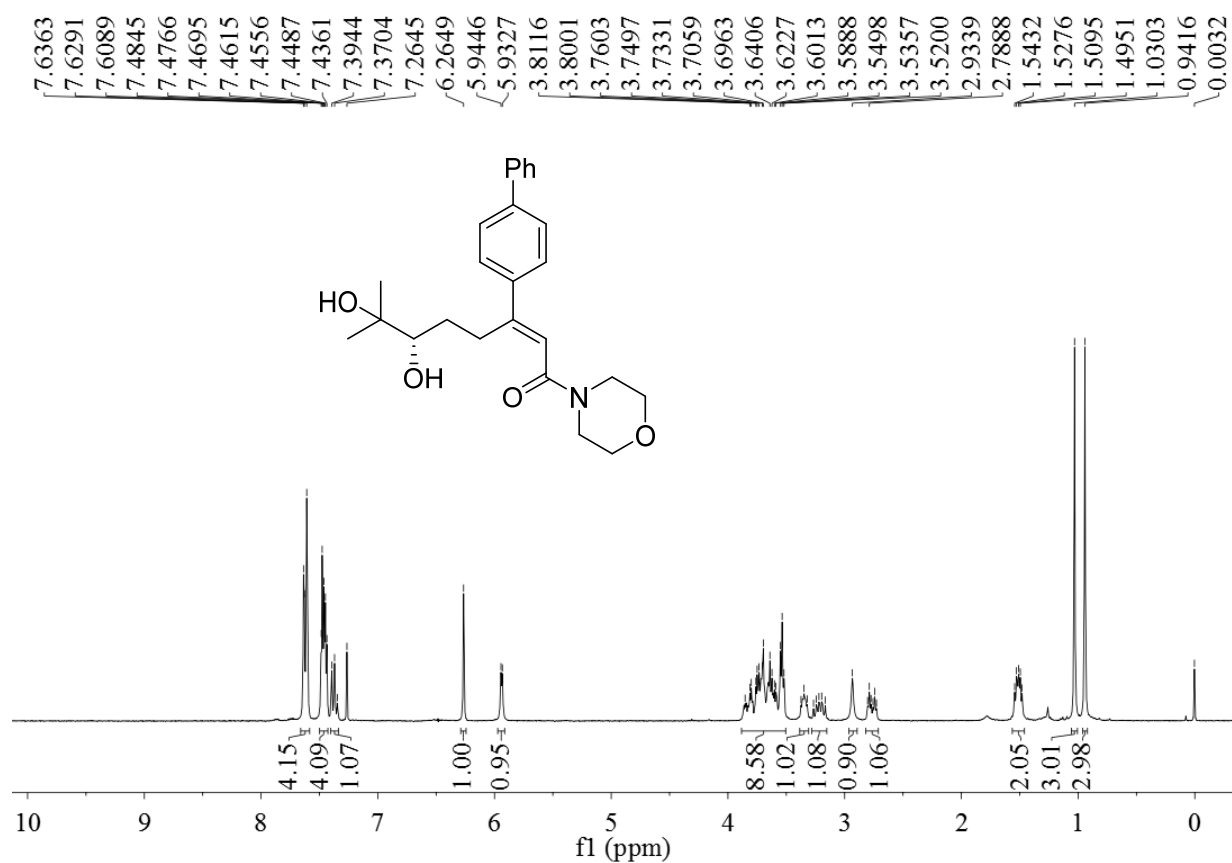

Figure S43. <sup>1</sup>H NMR of Compound (S)-11c

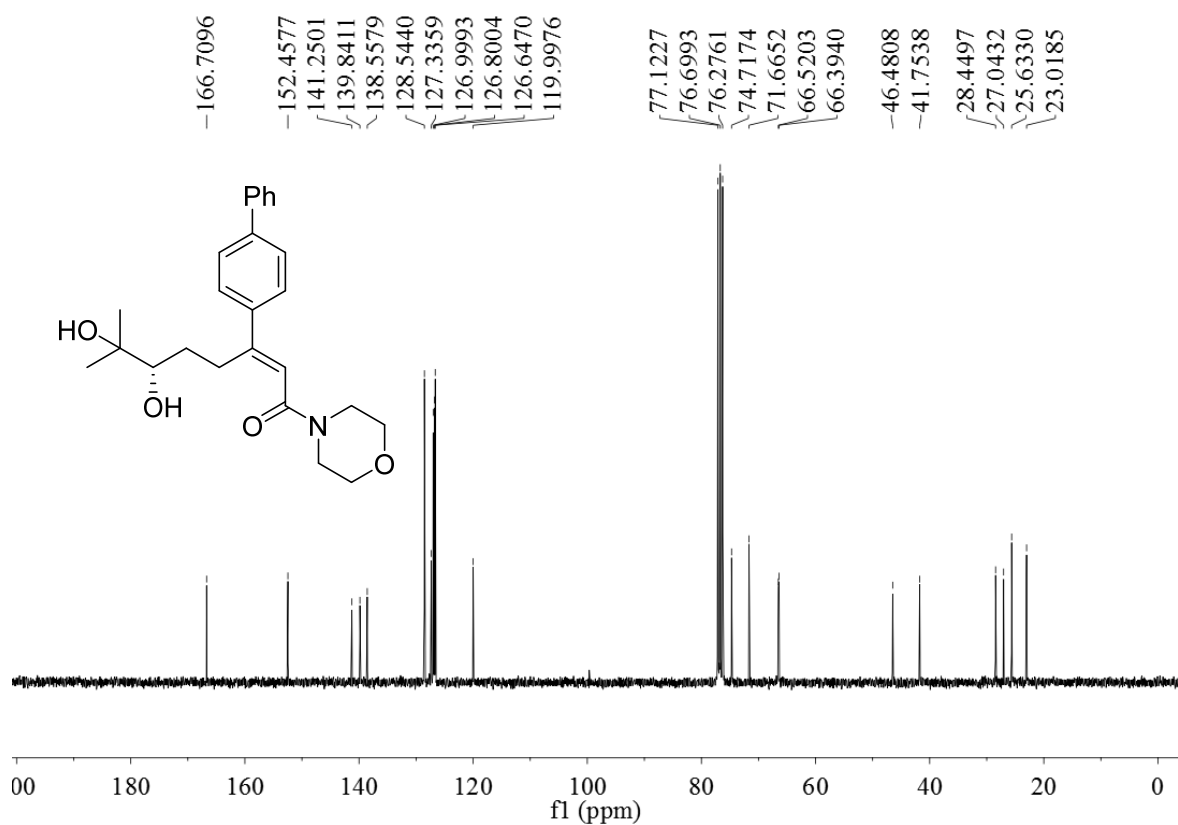

Figure S44. <sup>13</sup>C NMR spectrum of (S)-11c

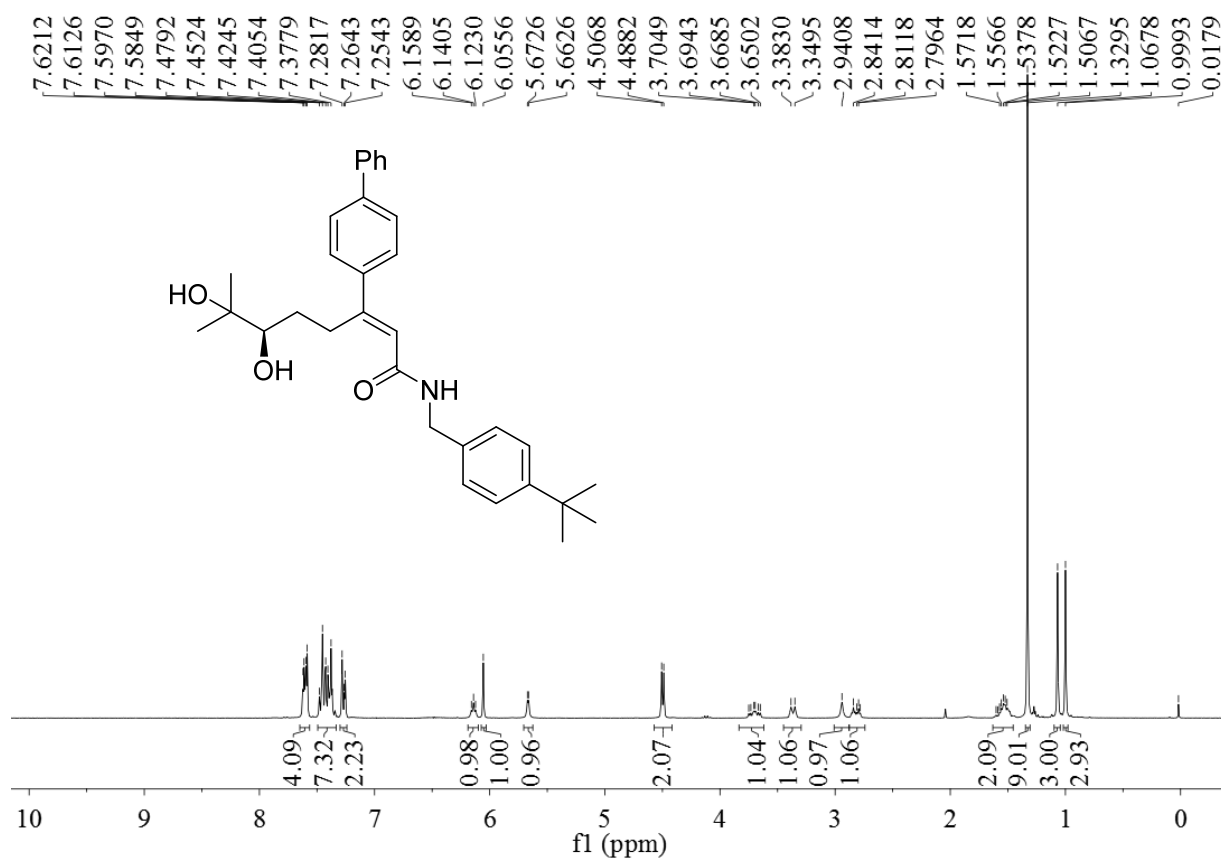

Figure S45. <sup>1</sup>H NMR of Compound (R)-11d

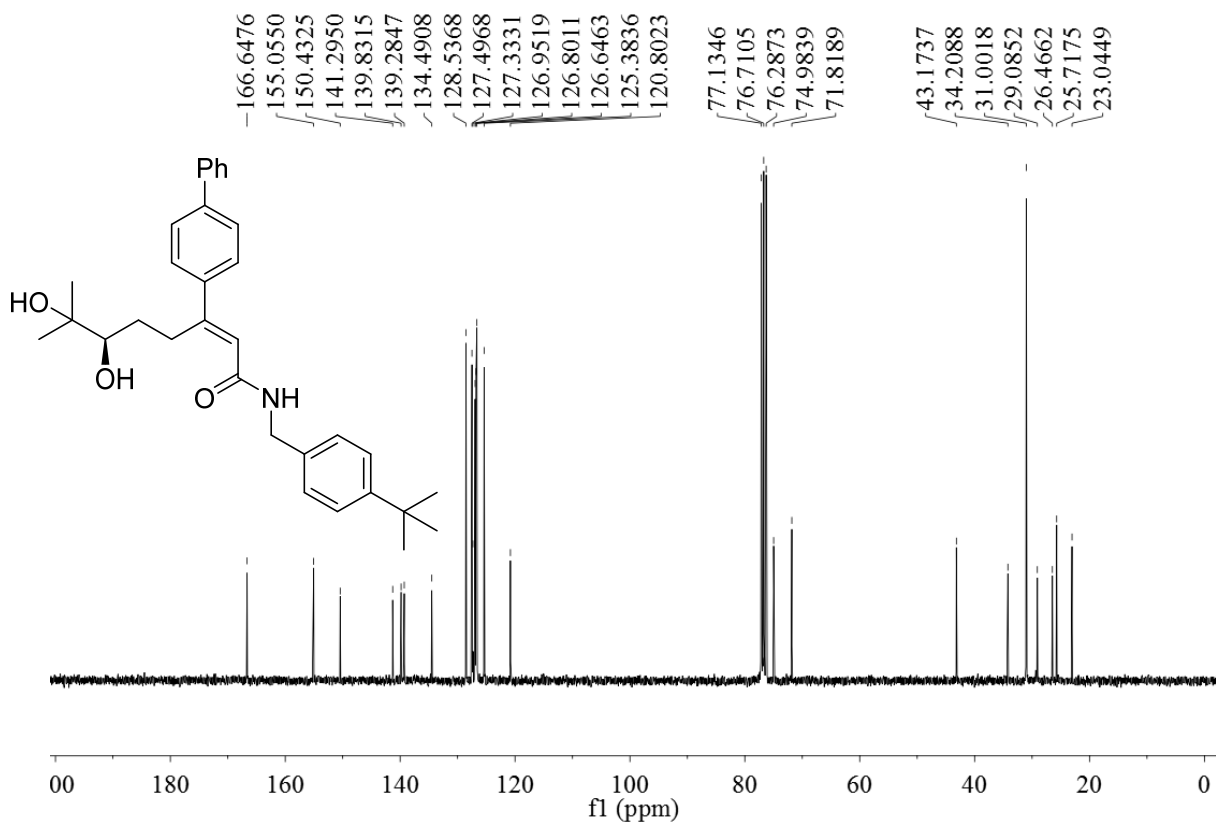

Figure S46. <sup>13</sup>C NMR spectrum of (R)-11d

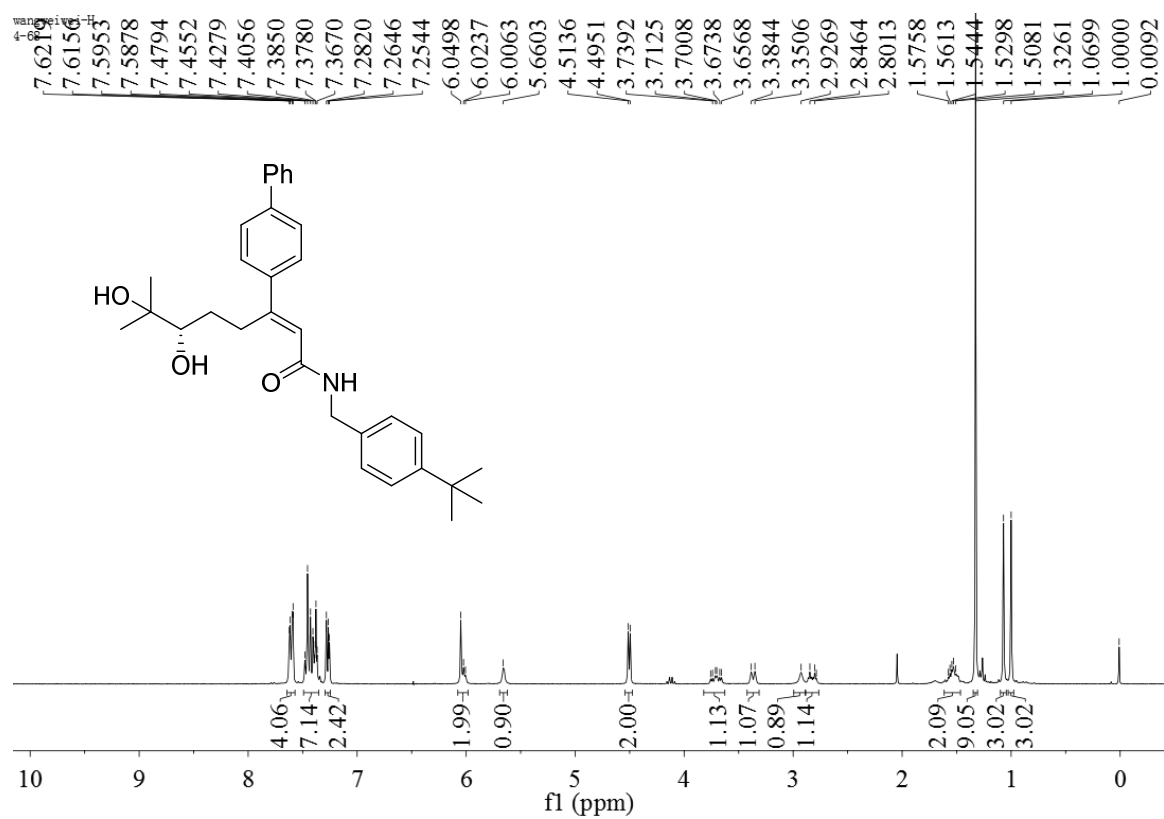

Figure S47. <sup>1</sup>H NMR of Compound (S)-11d

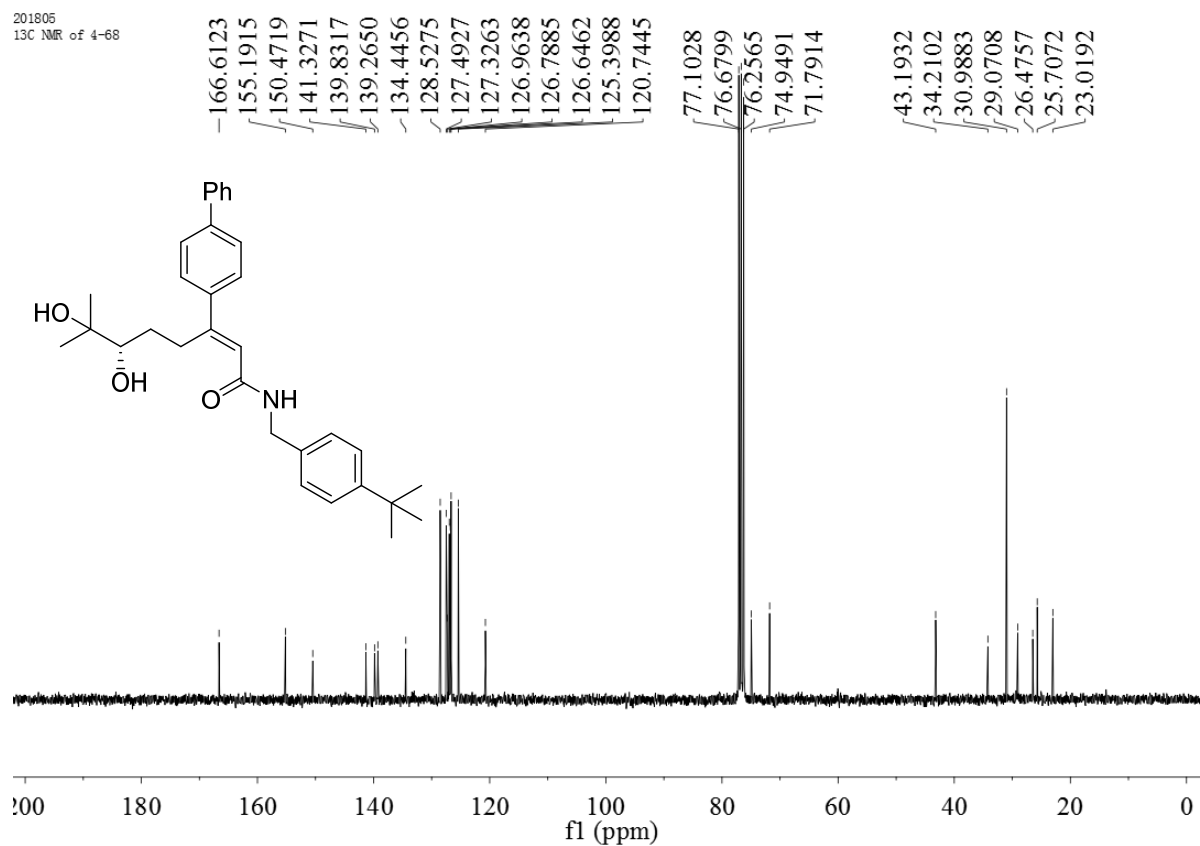

Figure S48. <sup>13</sup>C NMR spectrum of (S)-11d

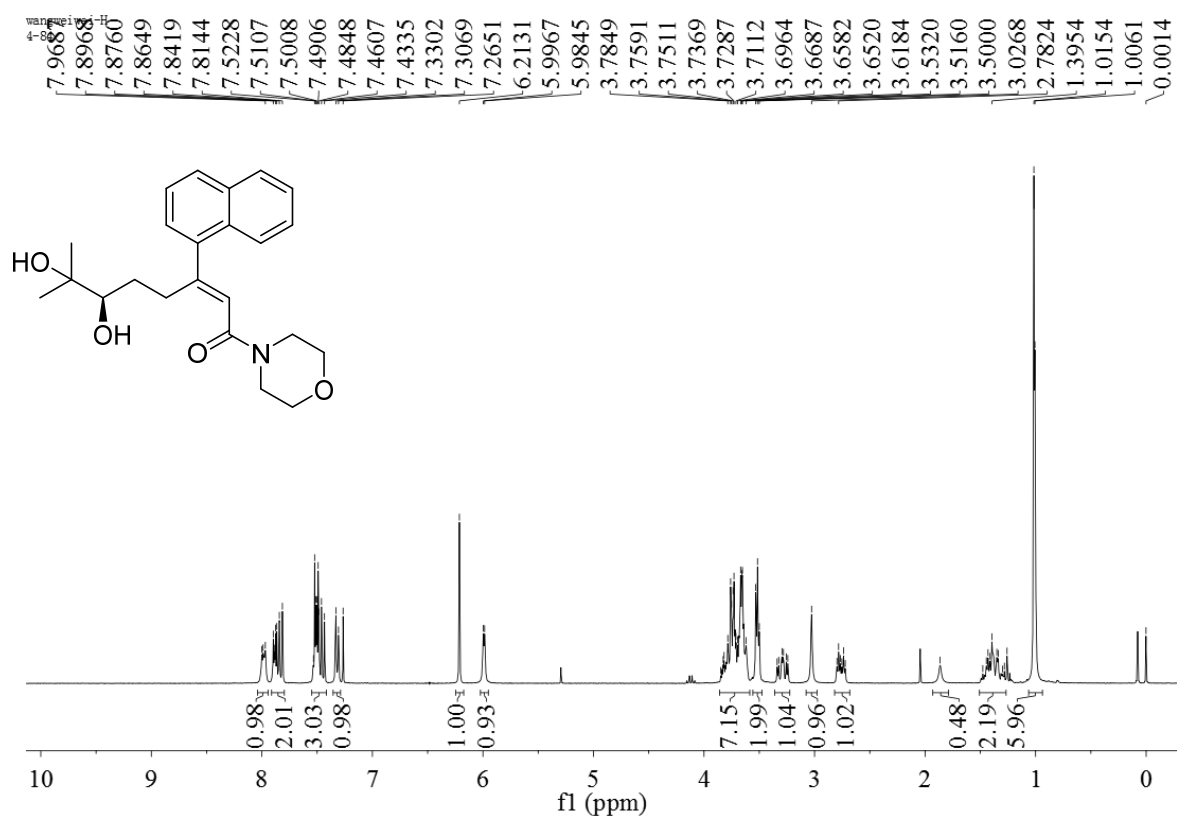

Figure S49. <sup>1</sup>H NMR of Compound (R)-11e

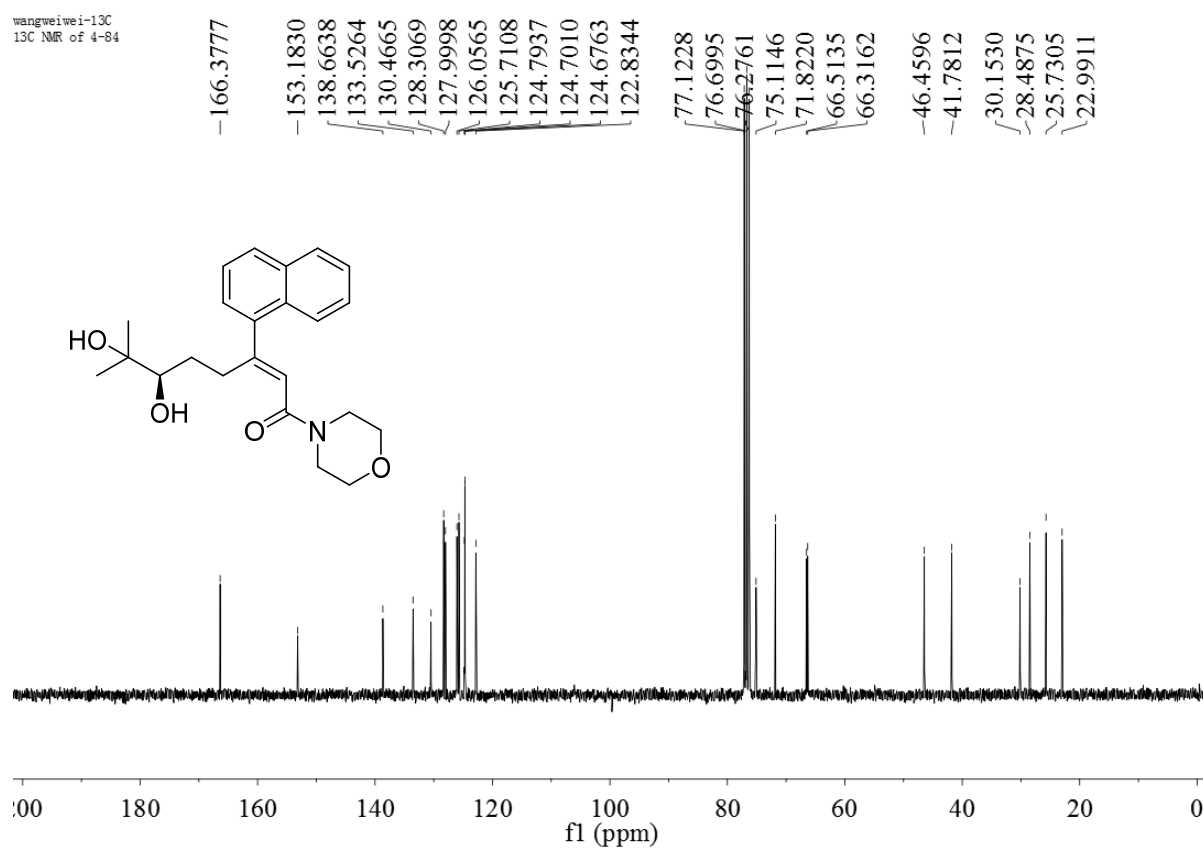

Figure S50. <sup>13</sup>C NMR spectrum of (R)-11e

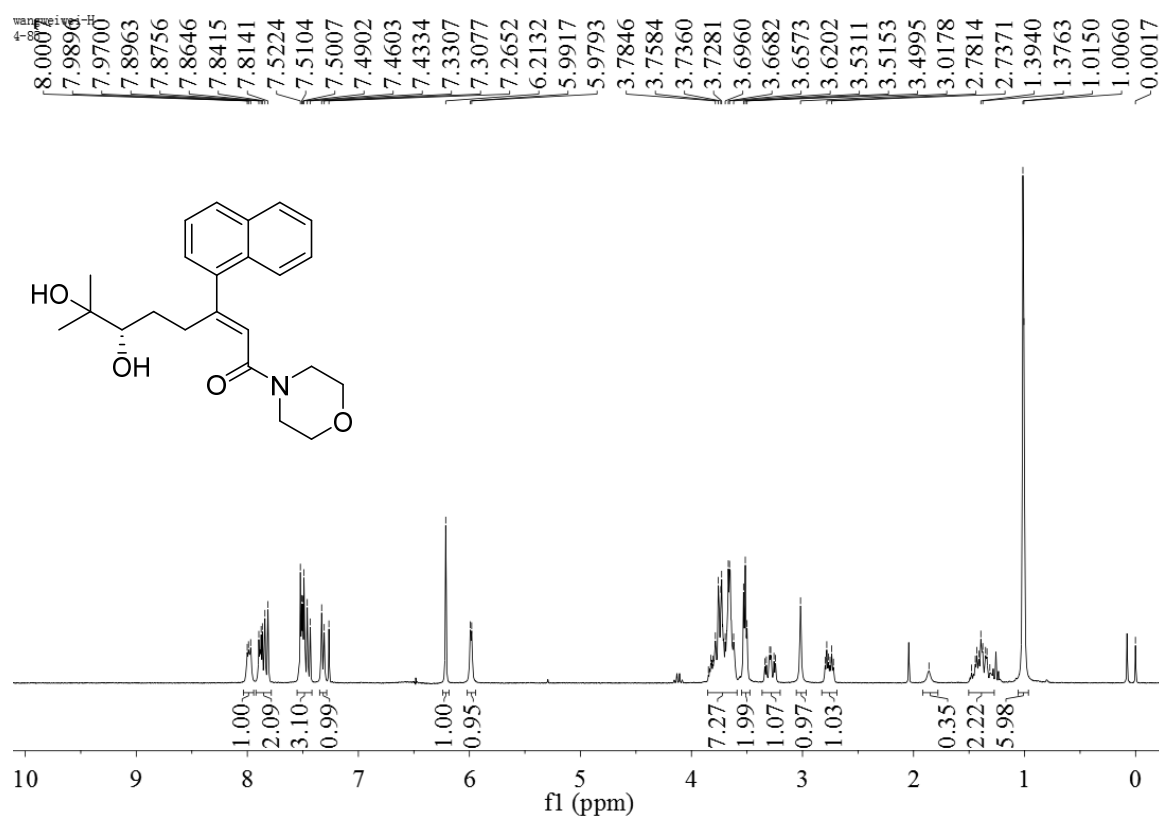

Figure S51. <sup>1</sup>H NMR of Compound (S)-11e

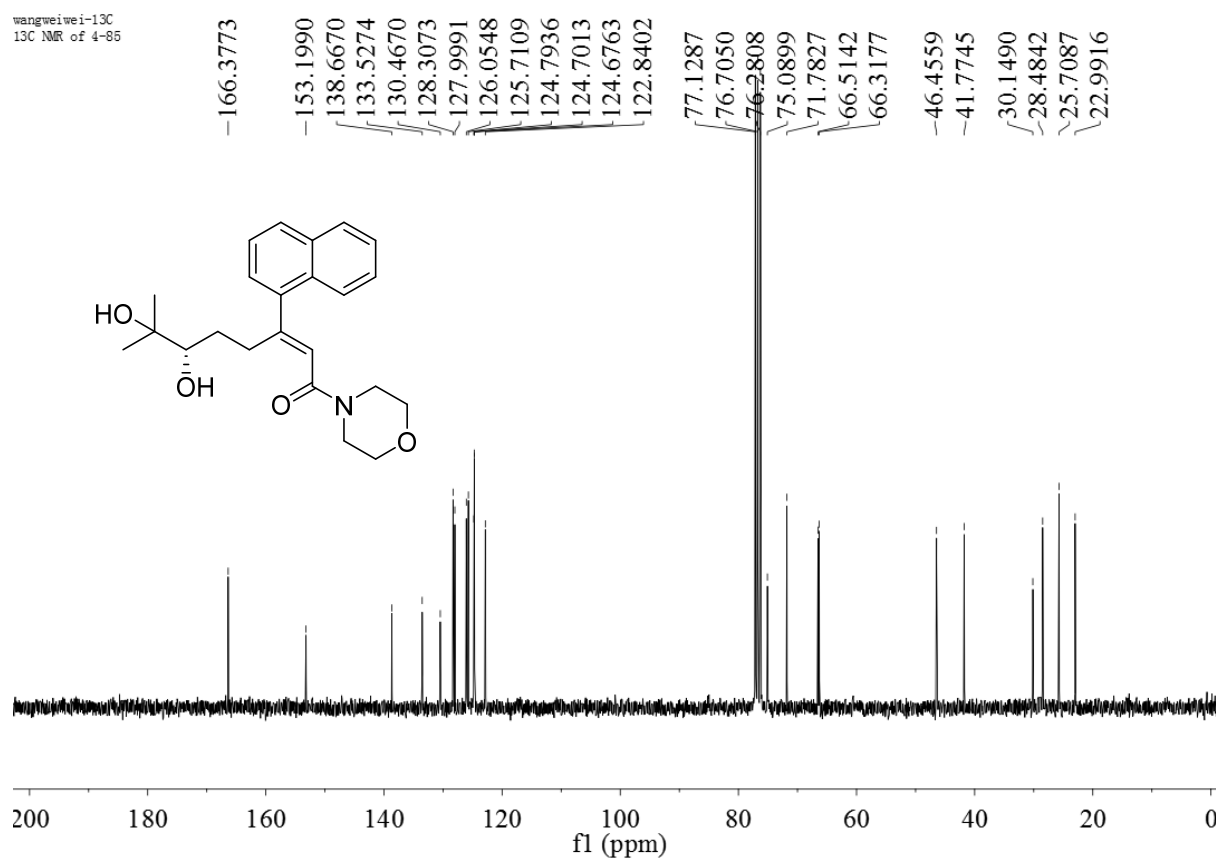

Figure S52. <sup>13</sup>C NMR spectrum of (S)-11e

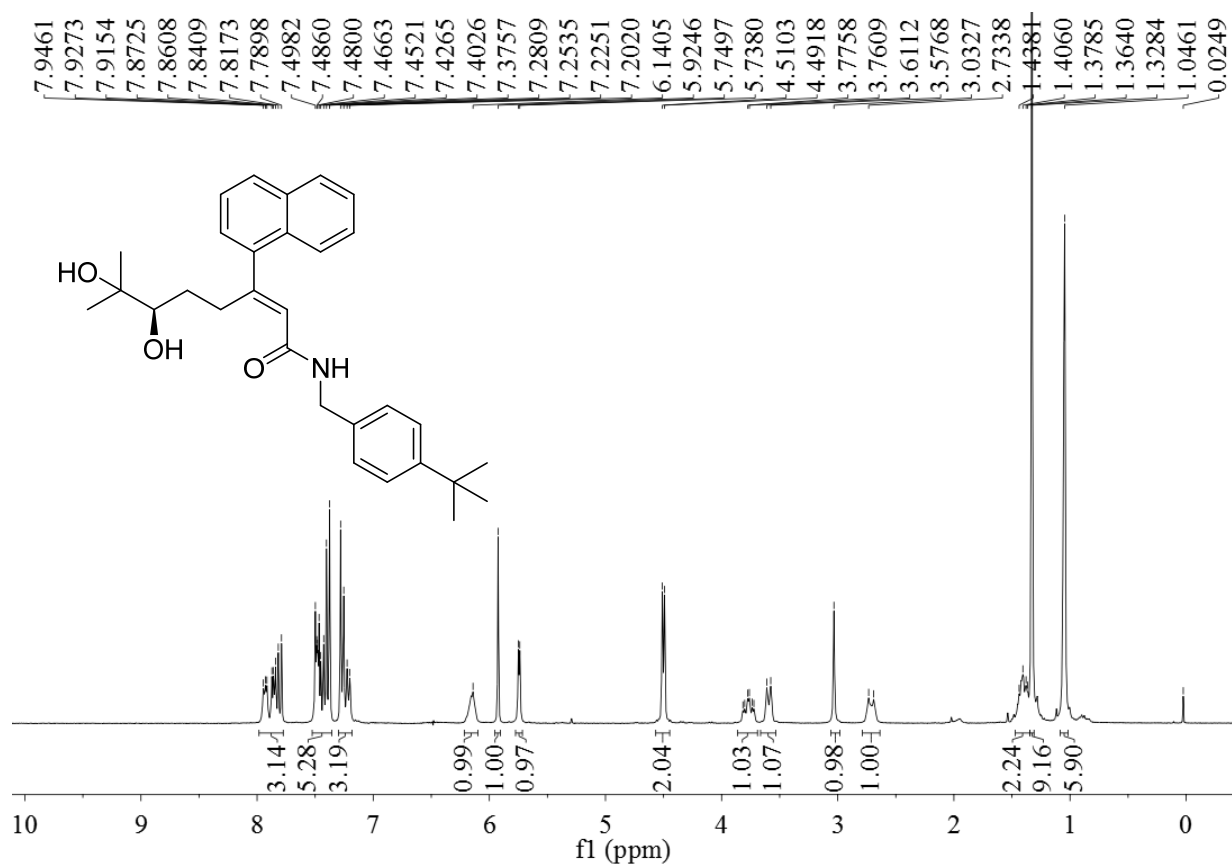

Figure S53. <sup>1</sup>H NMR of Compound (R)-11f

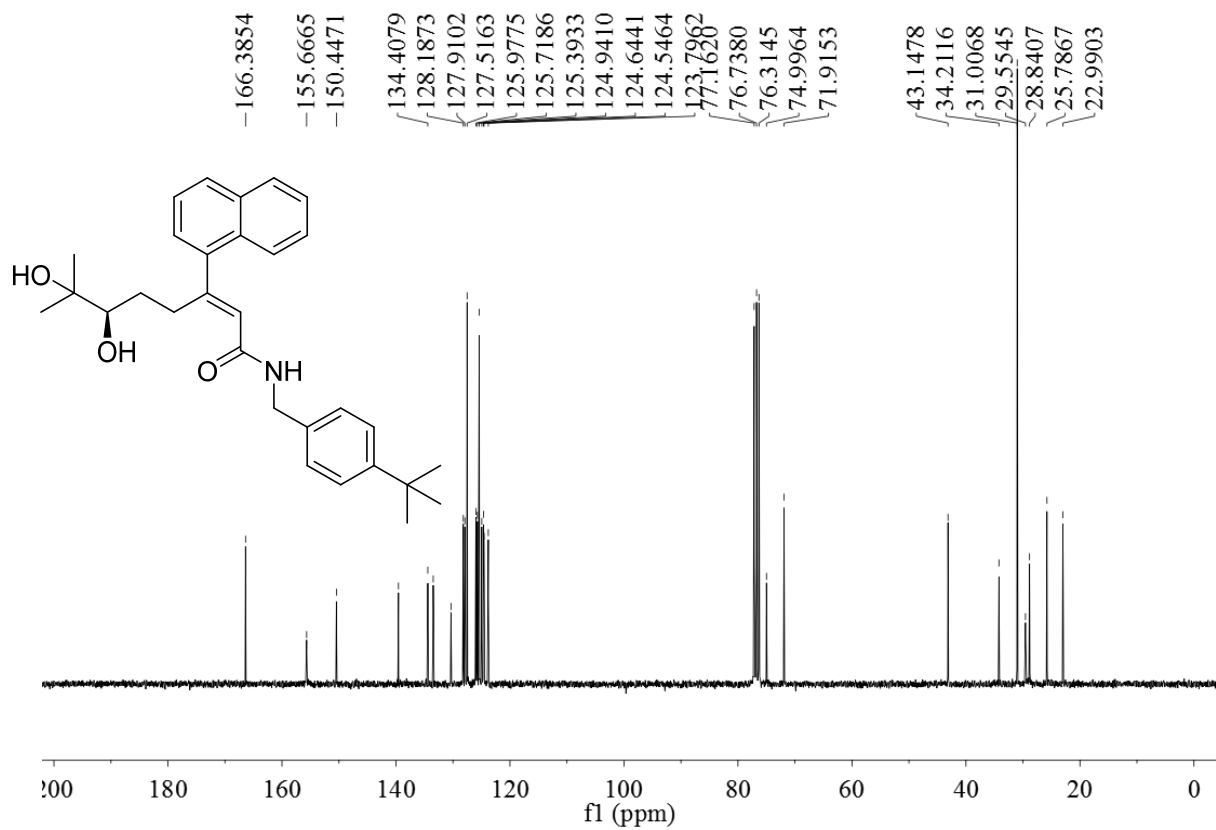

Figure S54. <sup>13</sup>C NMR spectrum of (R)-11f

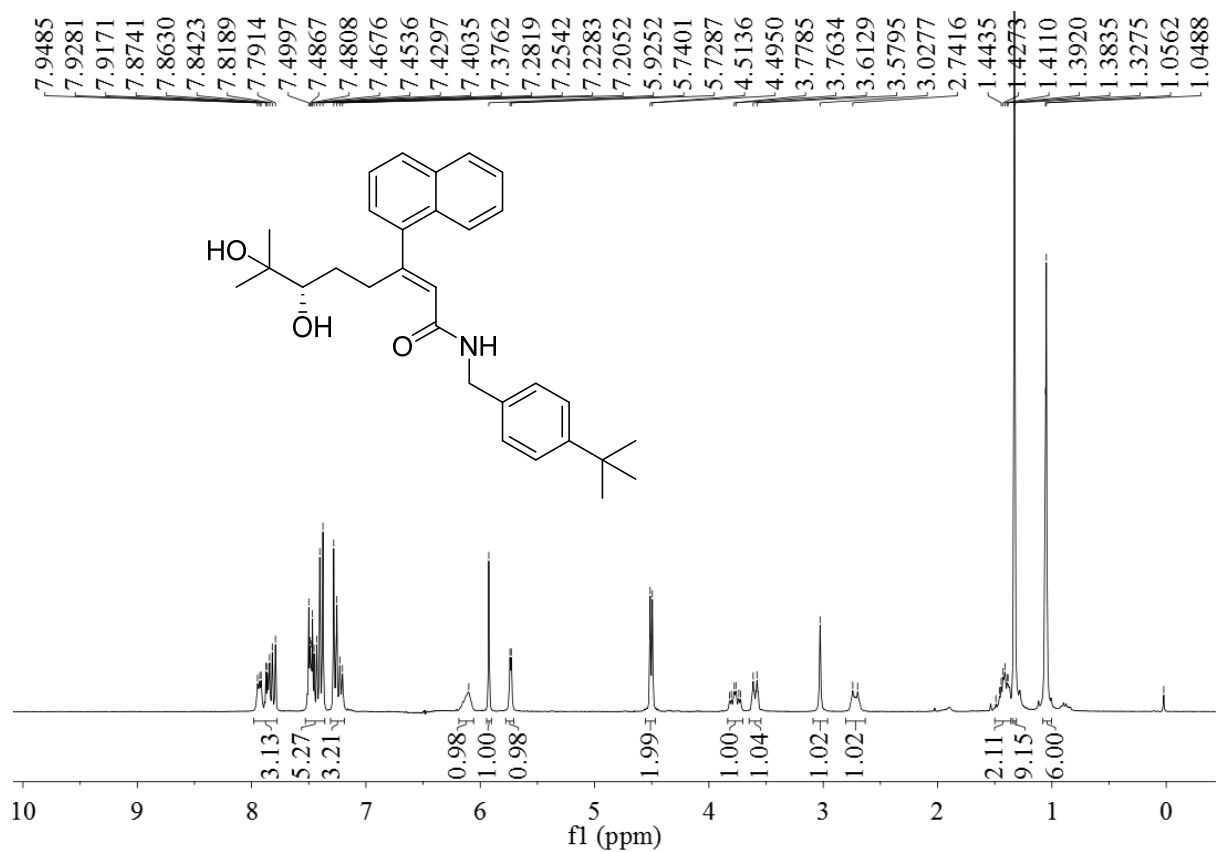

Figure S55. <sup>1</sup>H NMR of Compound (S)-11f

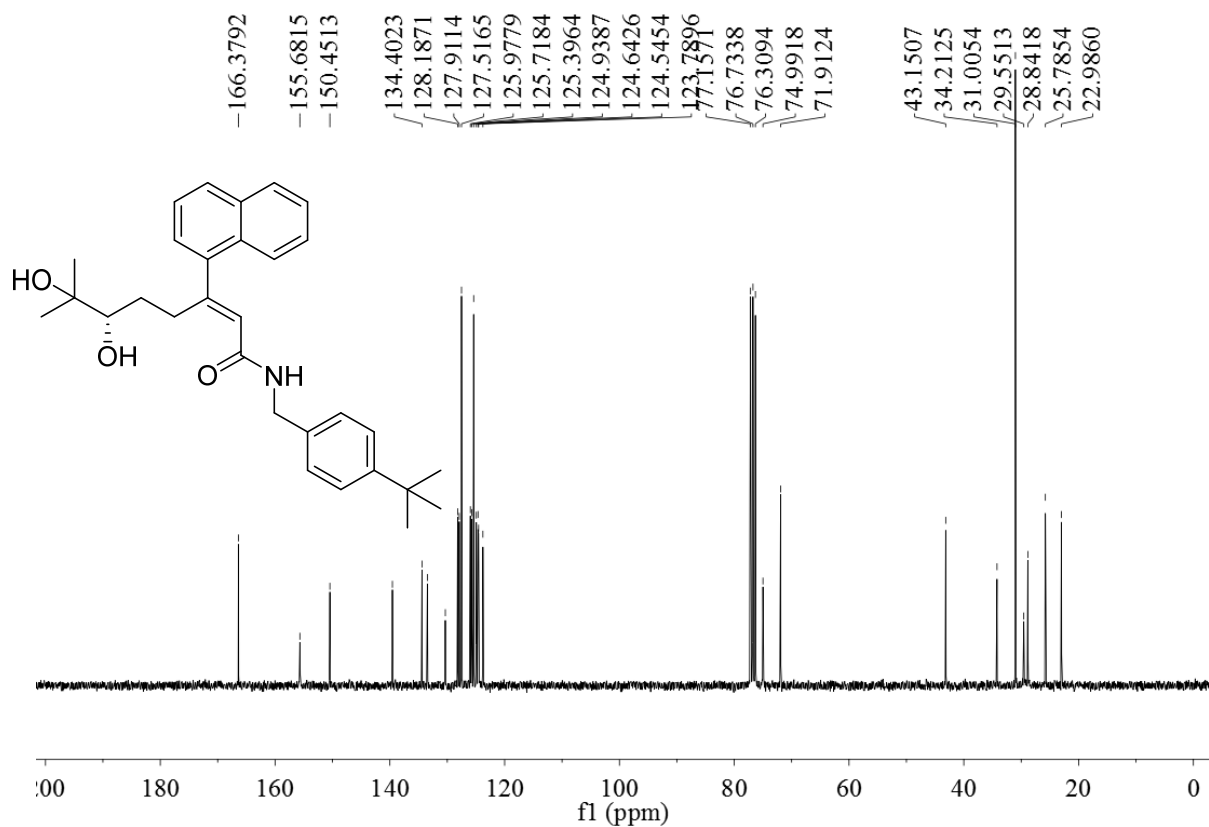

Figure S56. <sup>13</sup>C NMR spectrum of (S)-11f

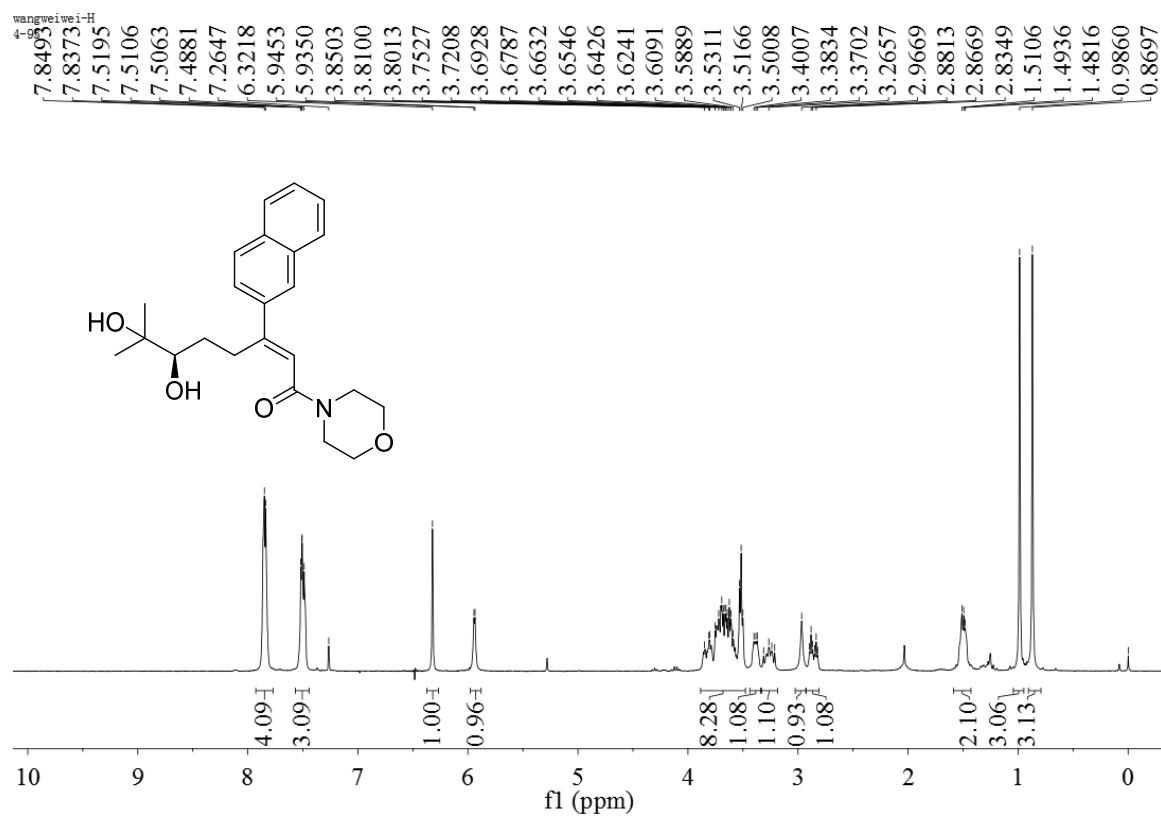

Figure S57. <sup>1</sup>H NMR of Compound (R)-11g

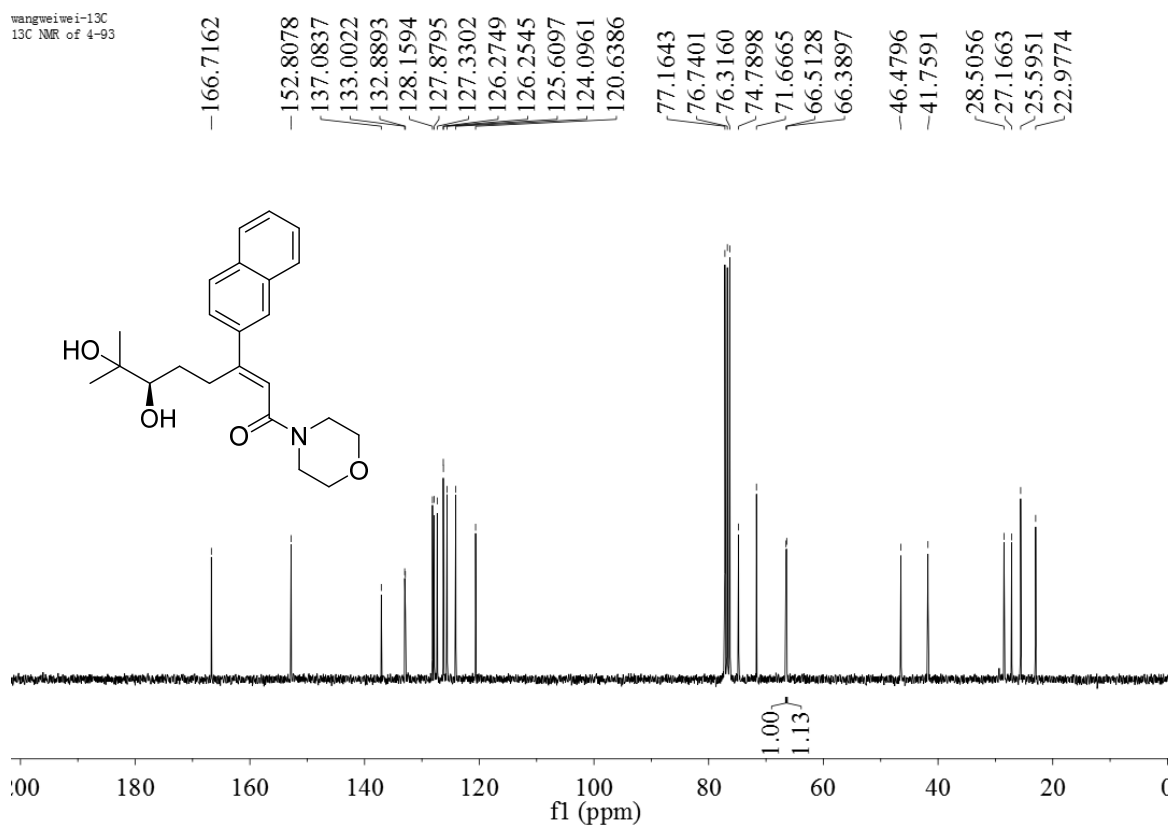

Figure S58. <sup>13</sup>C NMR spectrum of (R)-11g

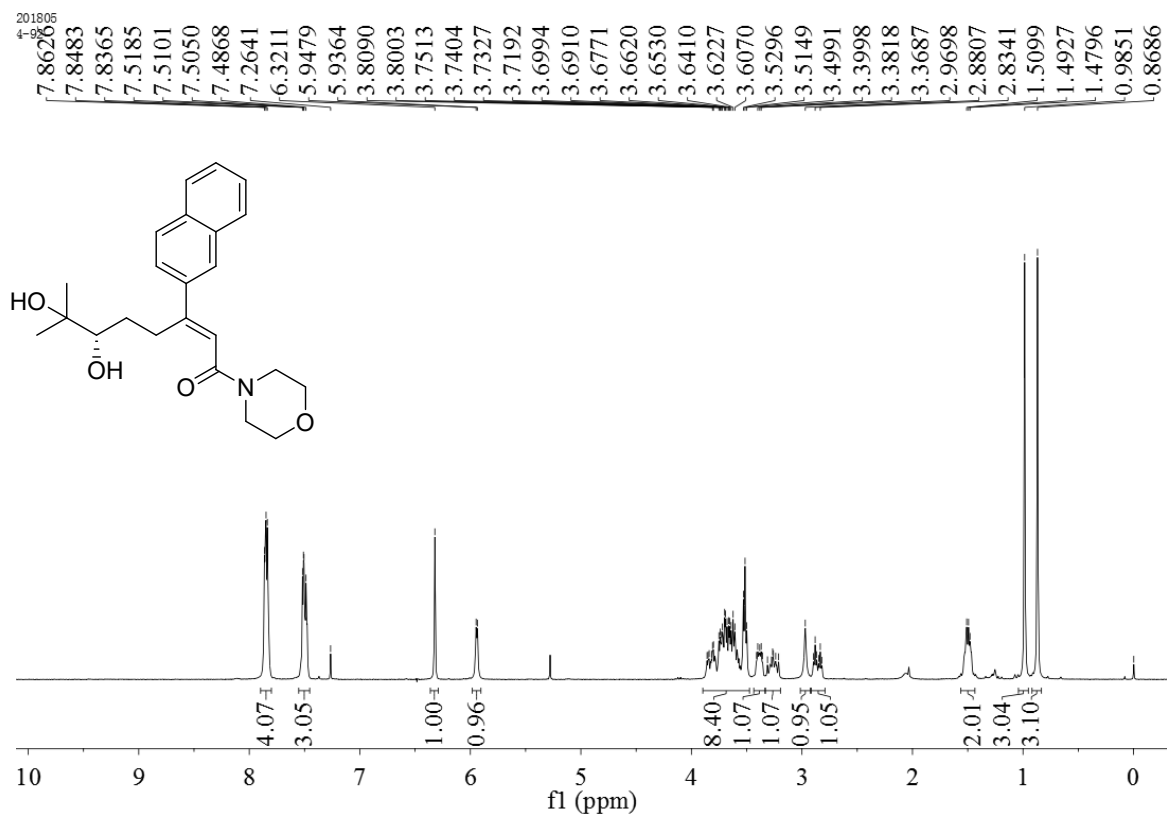

Figure S59. <sup>1</sup>H NMR of Compound (S)-11g

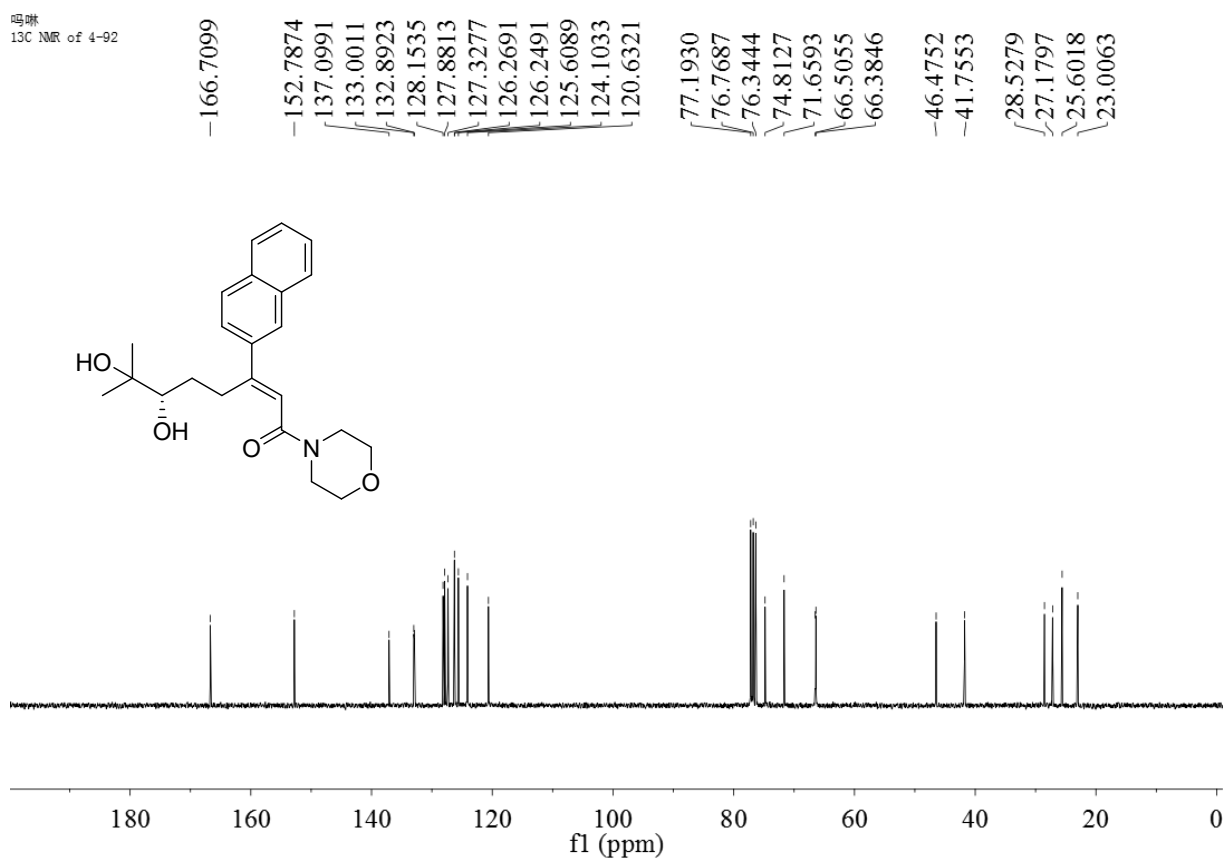

Figure S60. <sup>13</sup>C NMR spectrum of (S)-11g

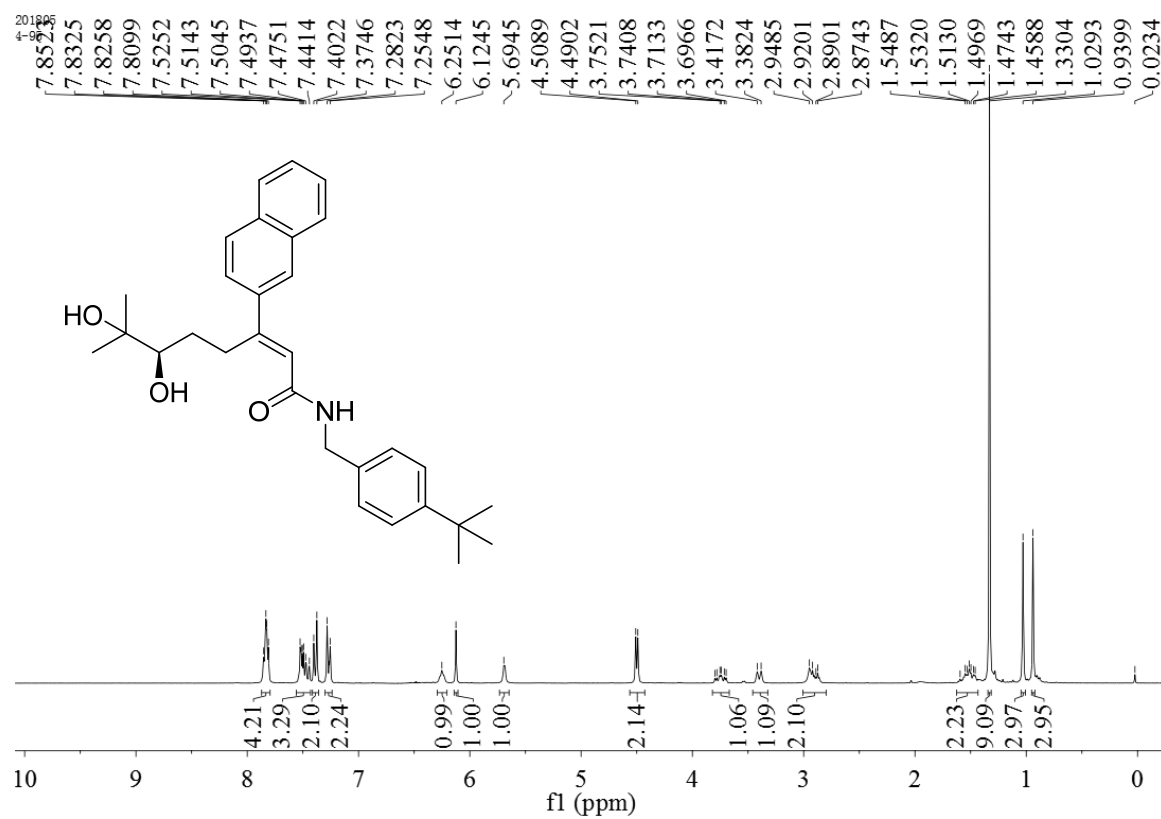

Figure S61. <sup>1</sup>H NMR of Compound (R)-11h

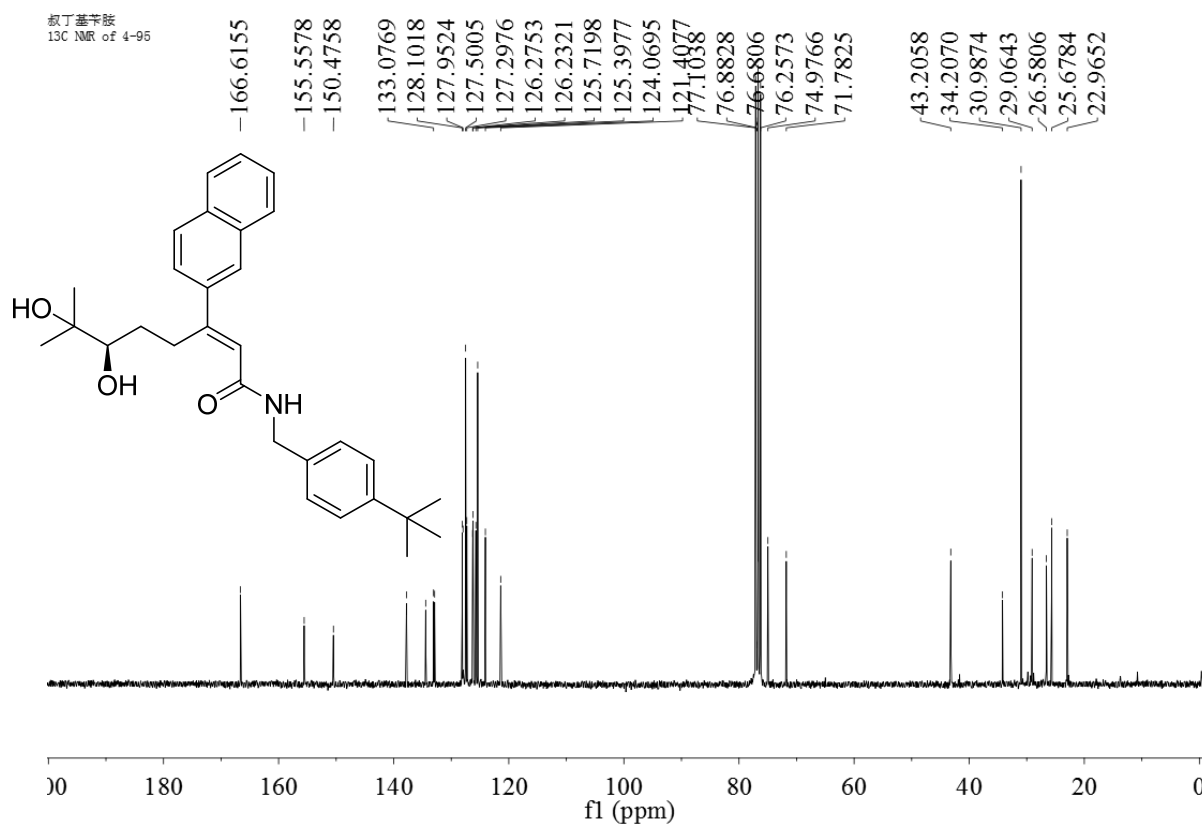

Figure S62. <sup>13</sup>C NMR spectrum of (R)-11h

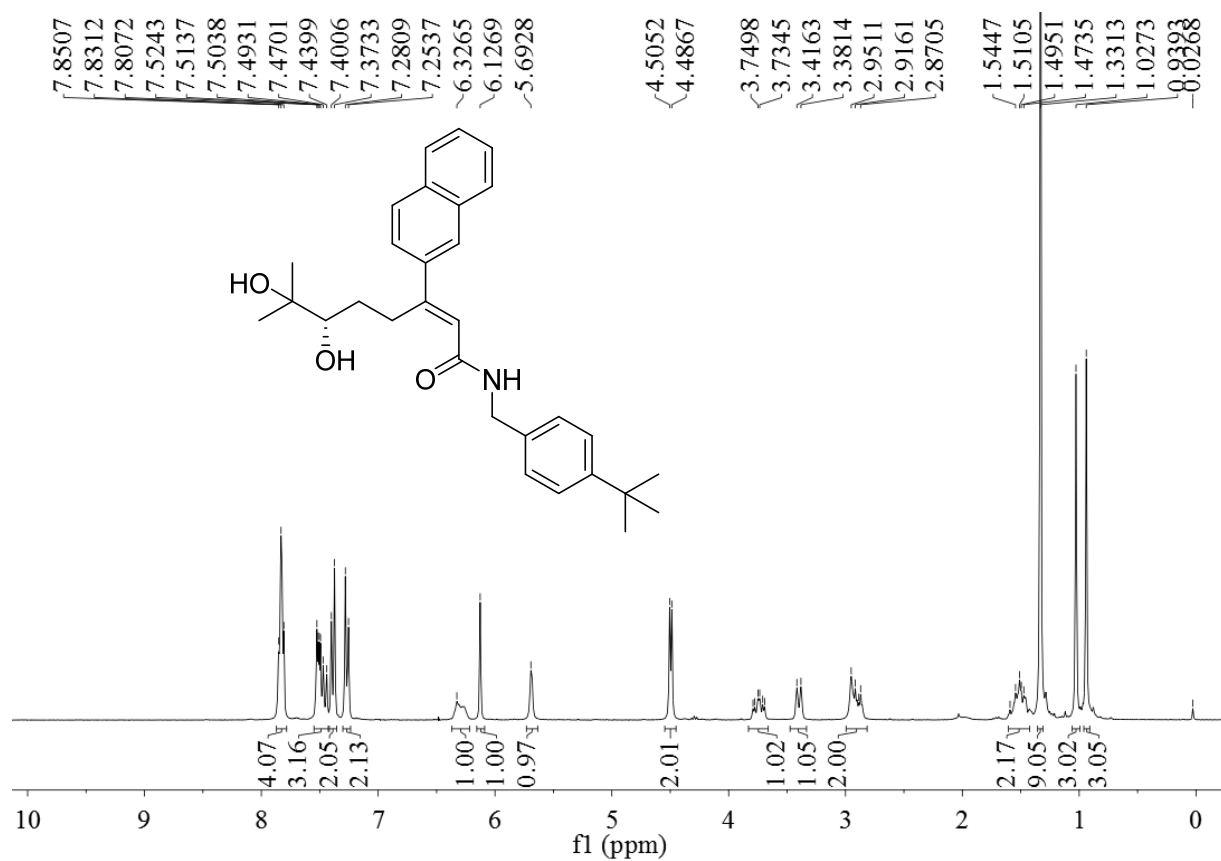

Figure S63. <sup>1</sup>H NMR of Compound (S)-11h

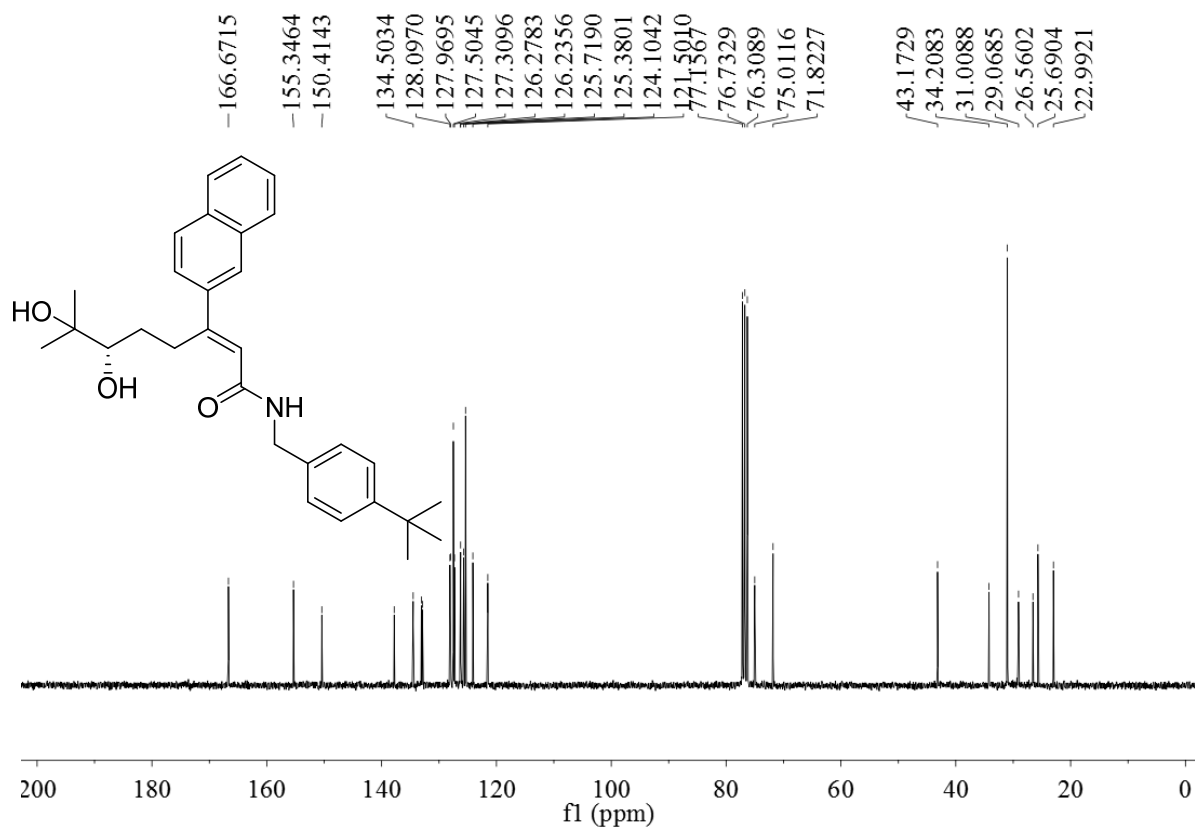

Figure S64. <sup>13</sup>C NMR spectrum of (S)-11h

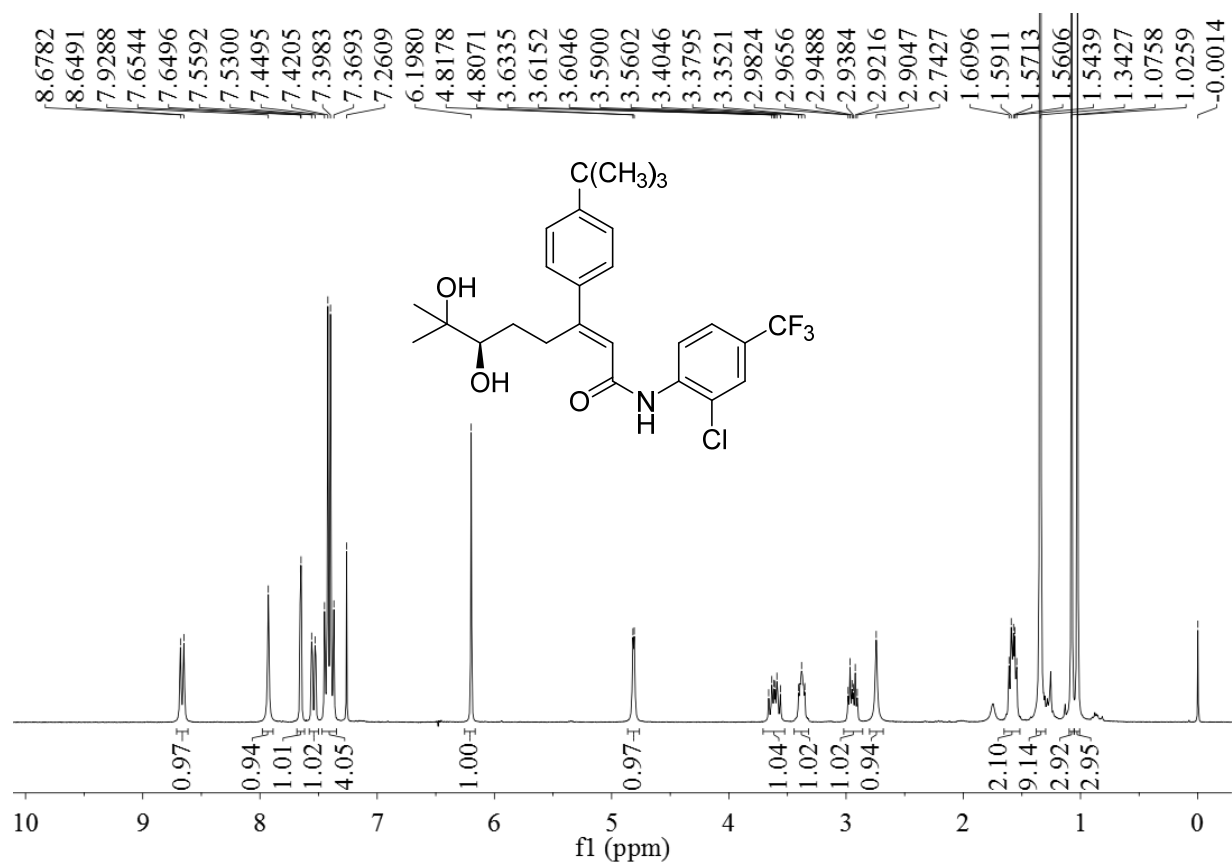

Figure S65. <sup>1</sup>H NMR of Compound (R)-11i

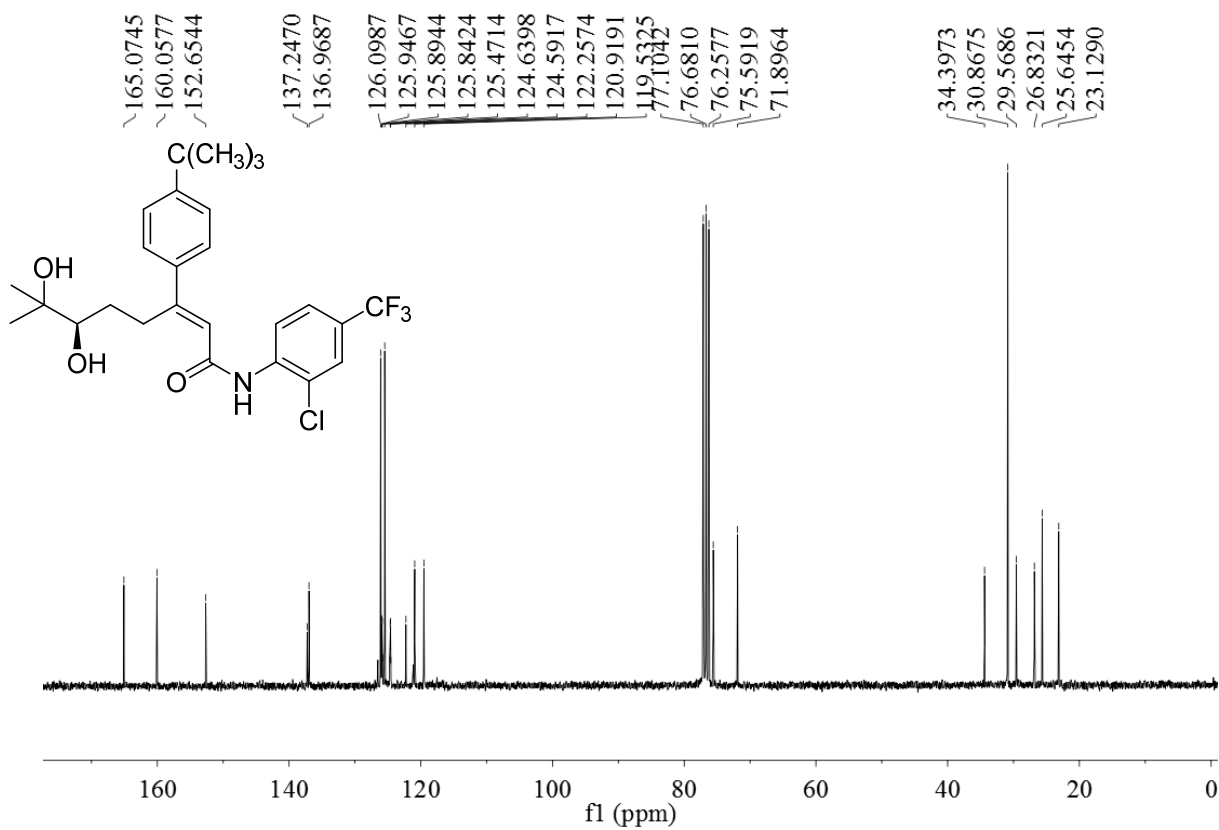

Figure S66. <sup>13</sup>C NMR spectrum of (R)-11i

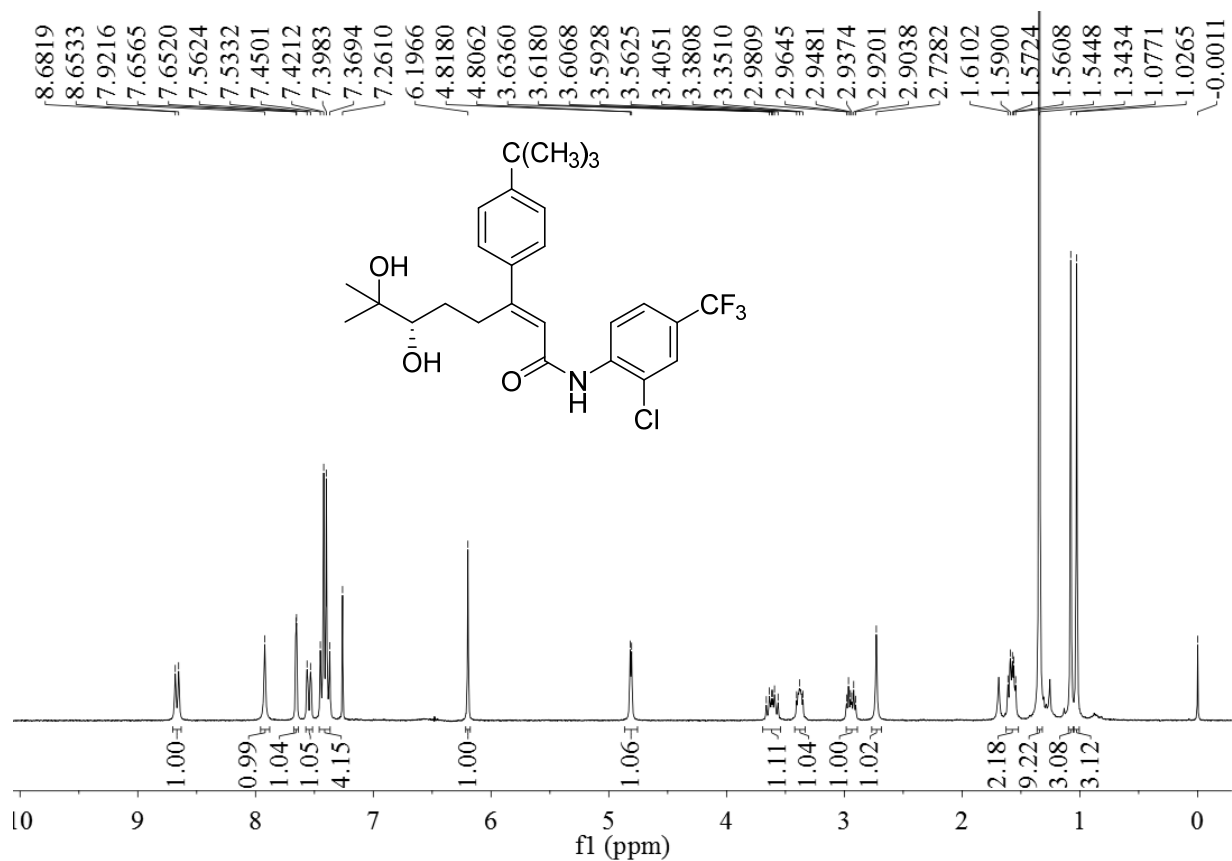

Figure S67. <sup>1</sup>H NMR of Compound (S)-11i

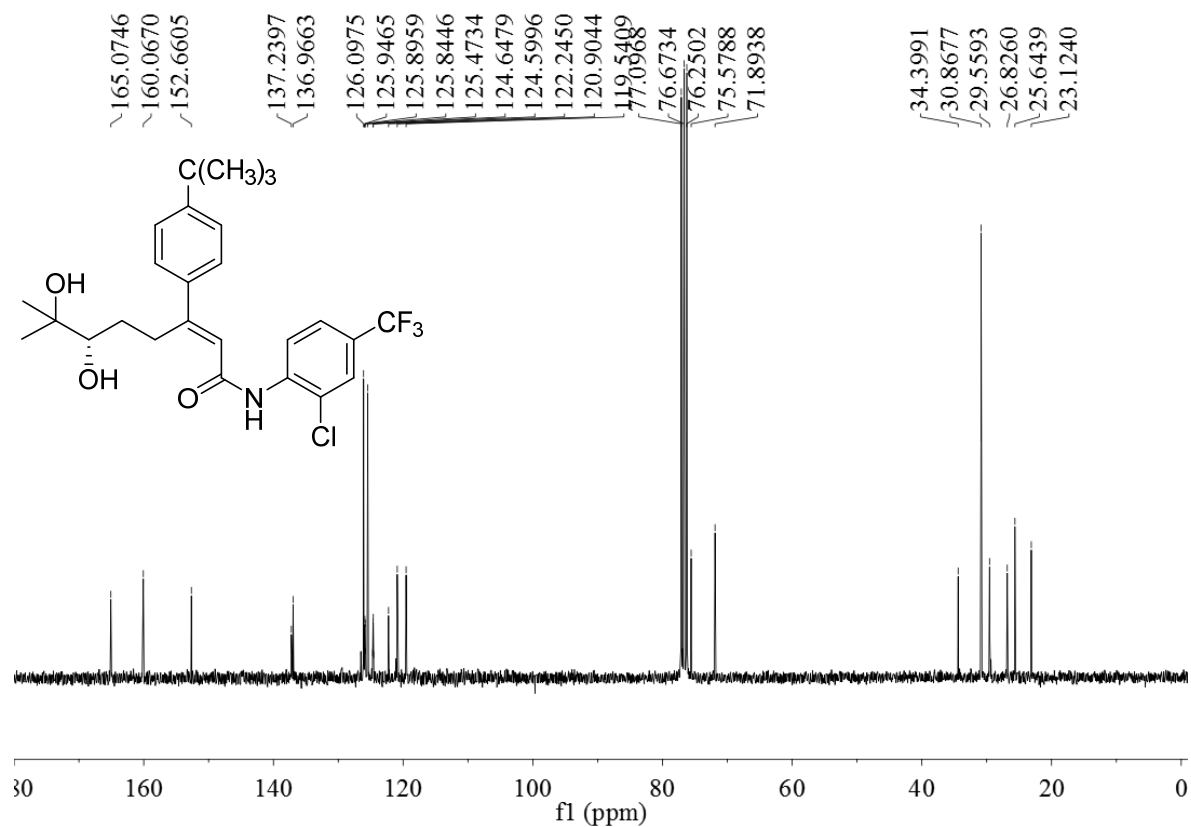

Figure S68. <sup>13</sup>C NMR spectrum of (S)-11i

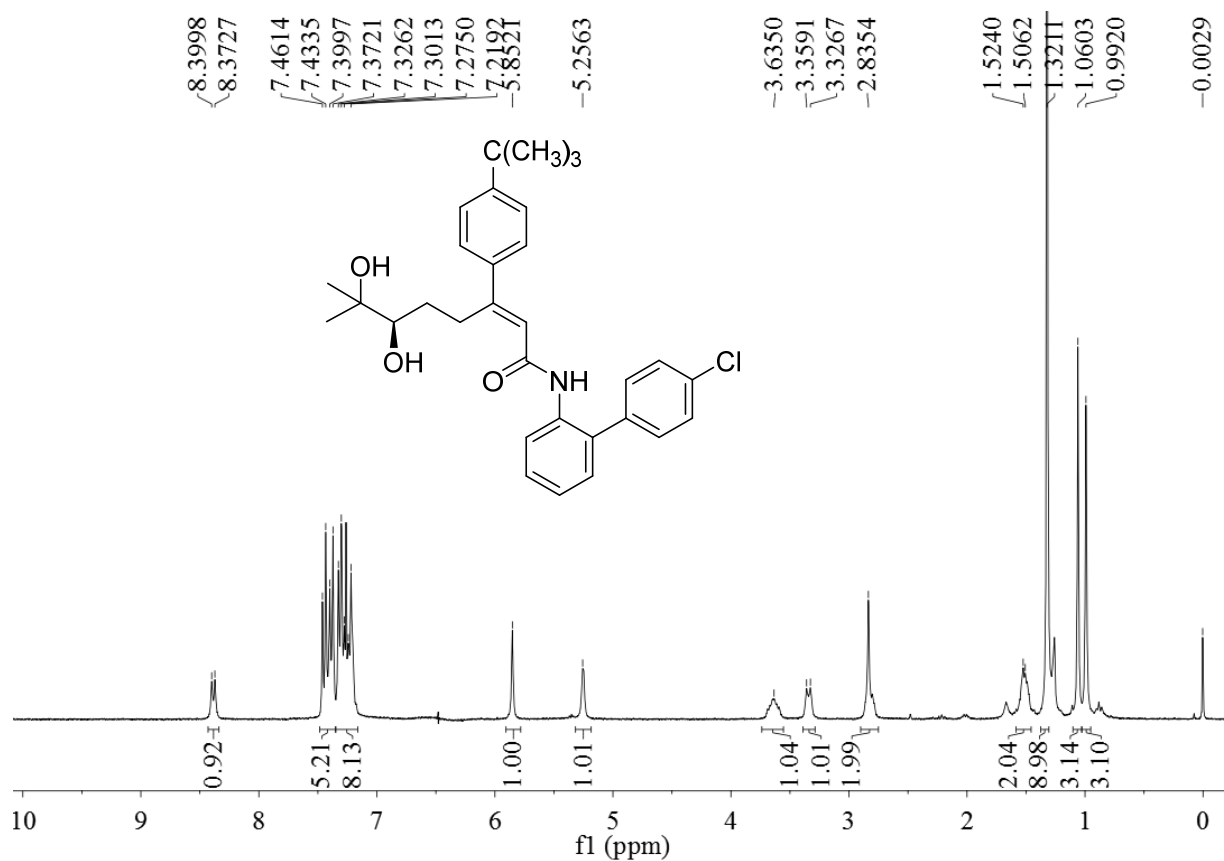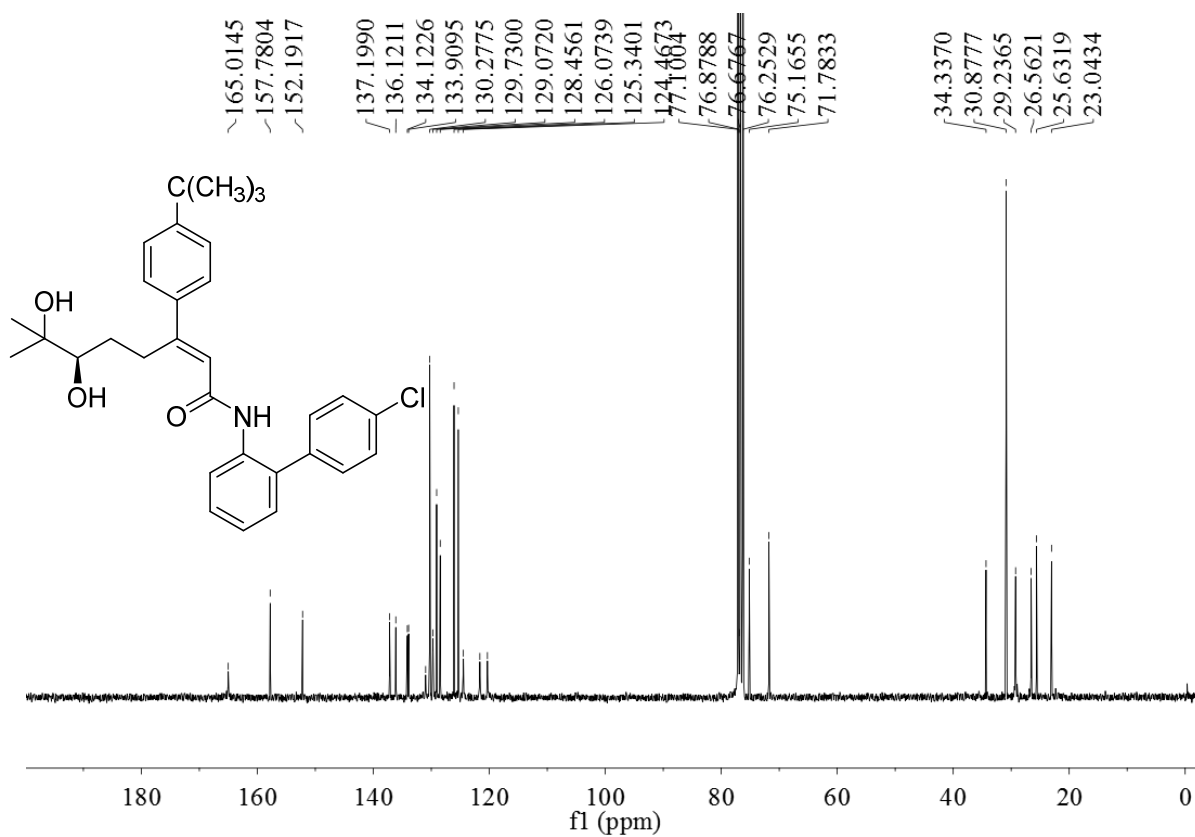

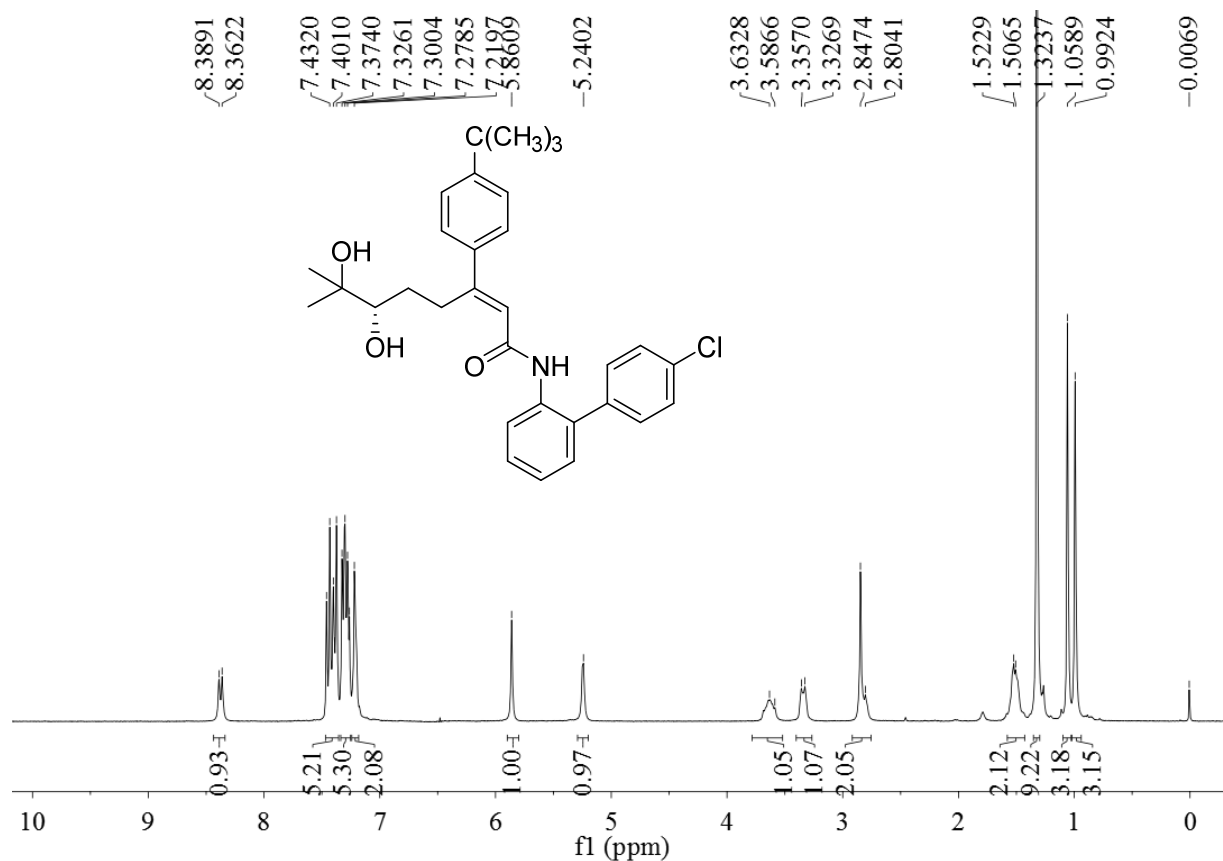

Figure S71. <sup>1</sup>H NMR of Compound (S)-11j

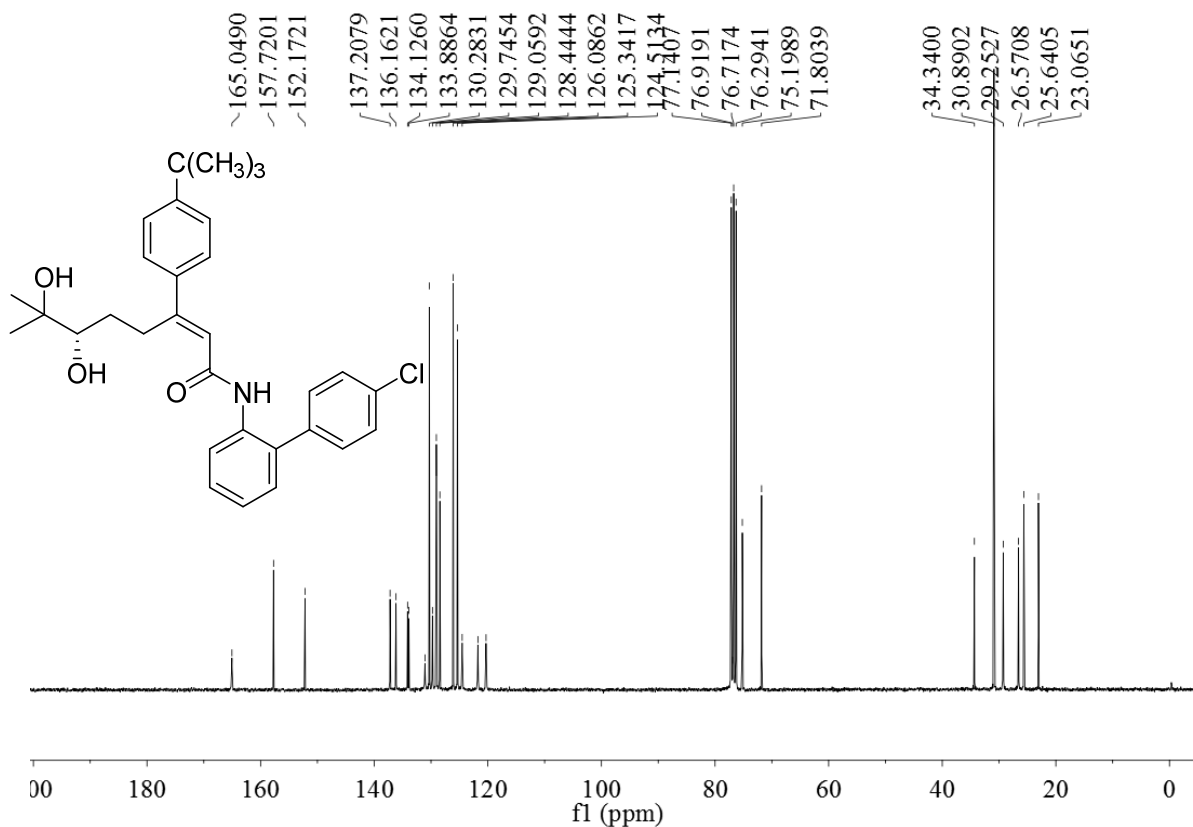

Figure S72. <sup>13</sup>C NMR spectrum of (S)-11j

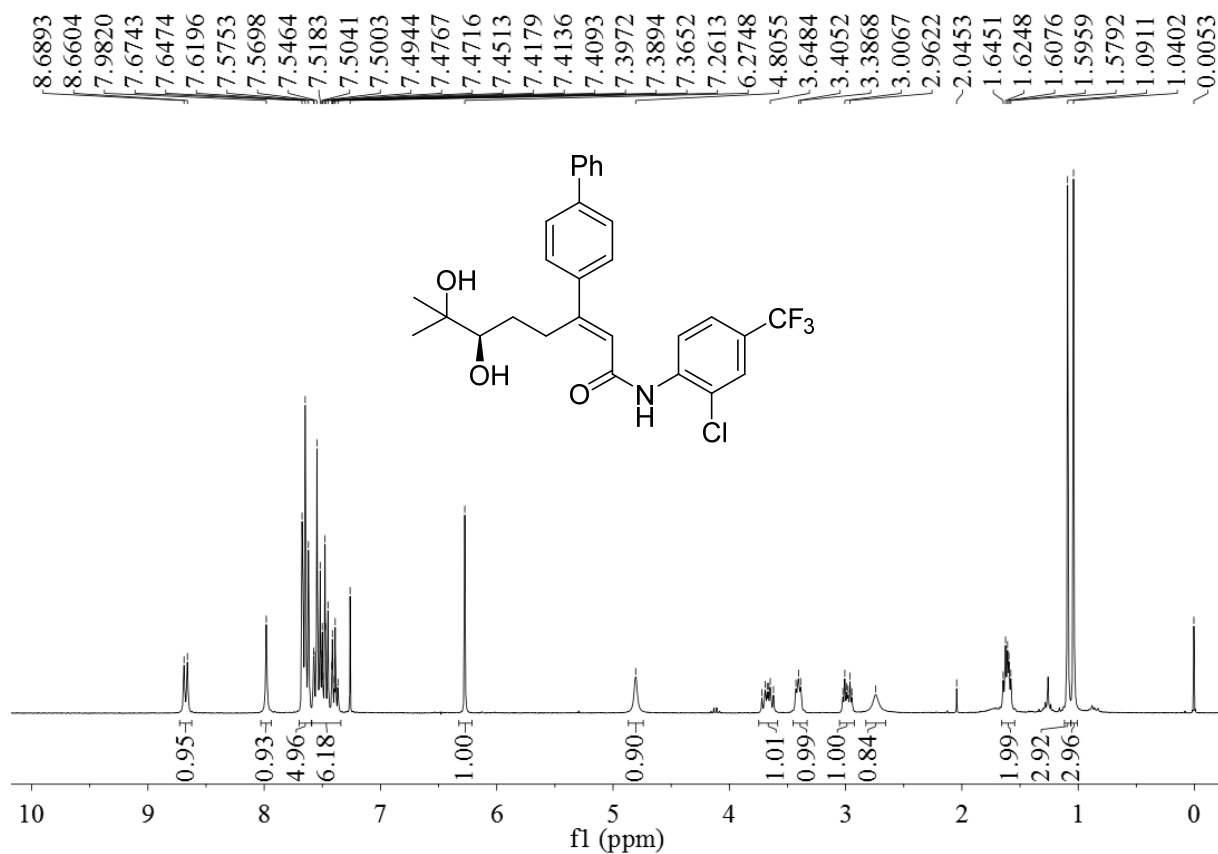

Figure S73. <sup>1</sup>H NMR of Compound (R)-11k

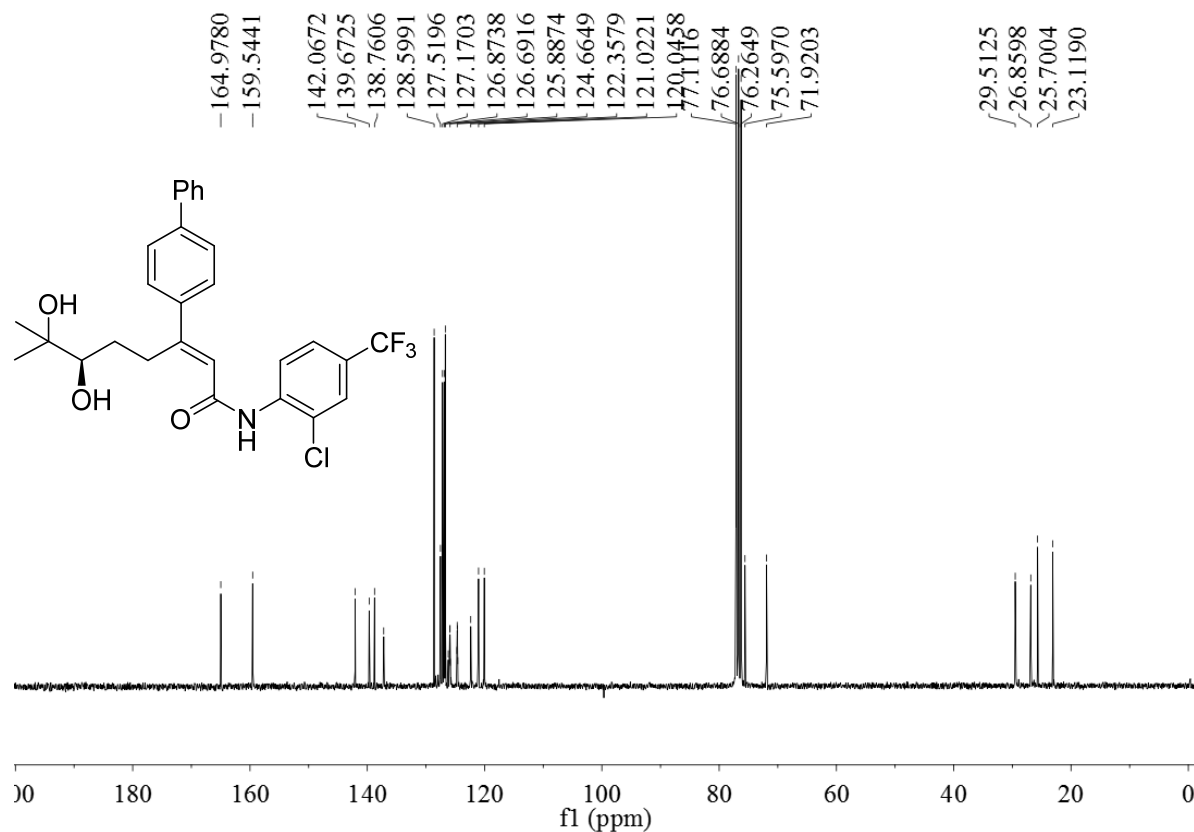

Figure S74. <sup>13</sup>C NMR spectrum of (R)-11k

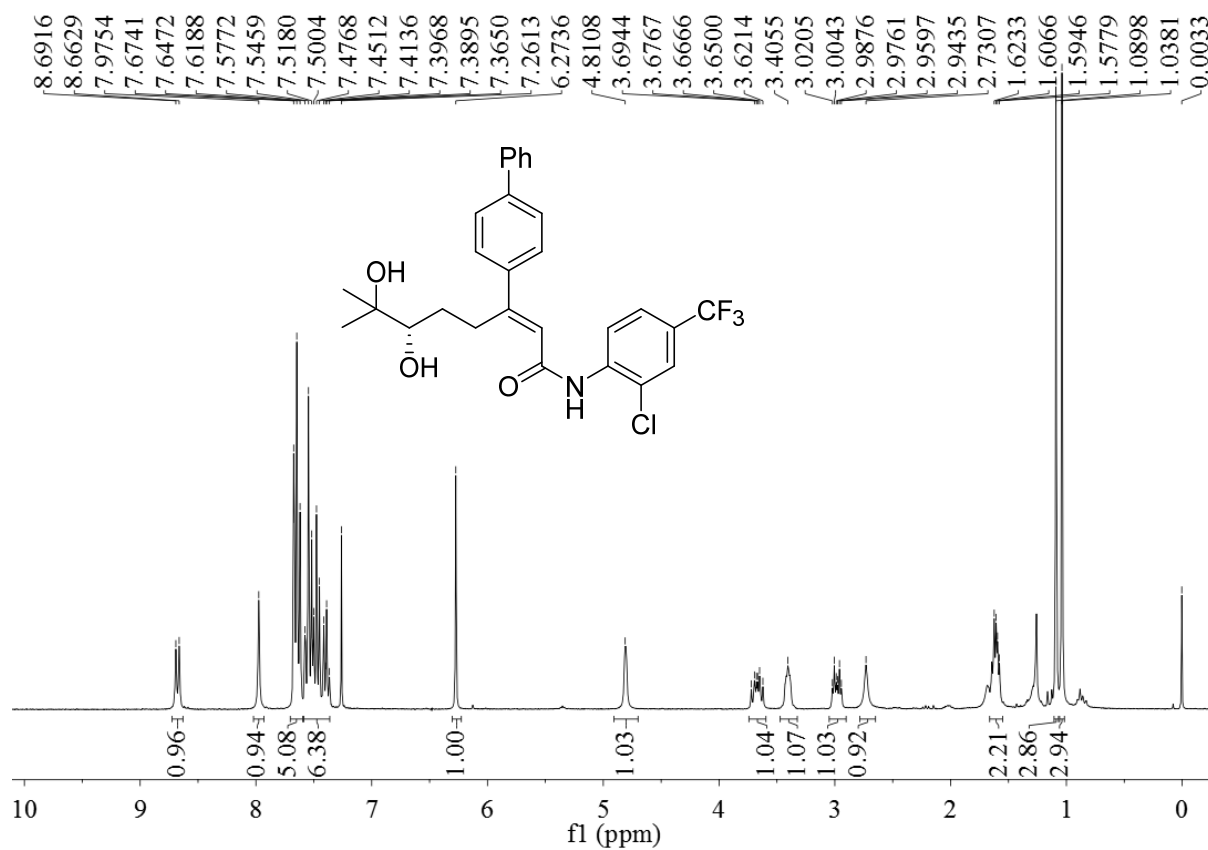

Figure S75. <sup>1</sup>H NMR of Compound (S)-11k

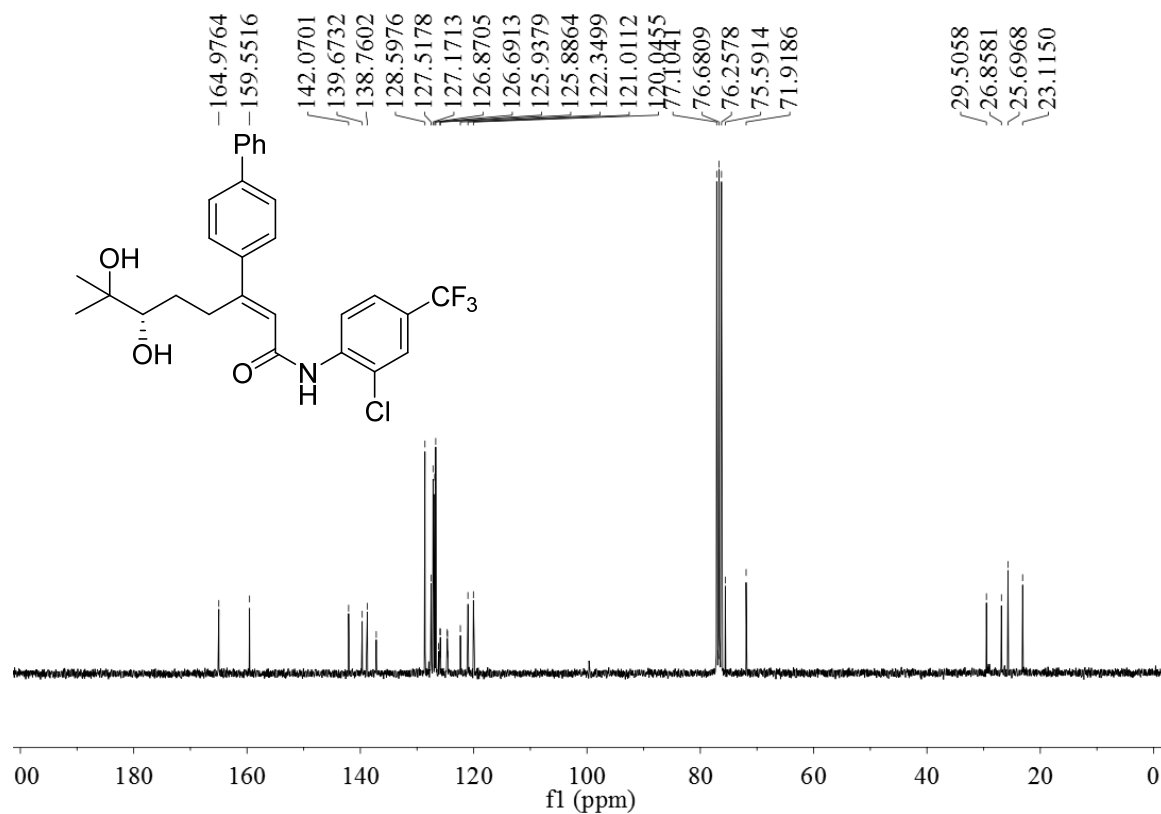

Figure S76. <sup>13</sup>C NMR spectrum of (S)-11k

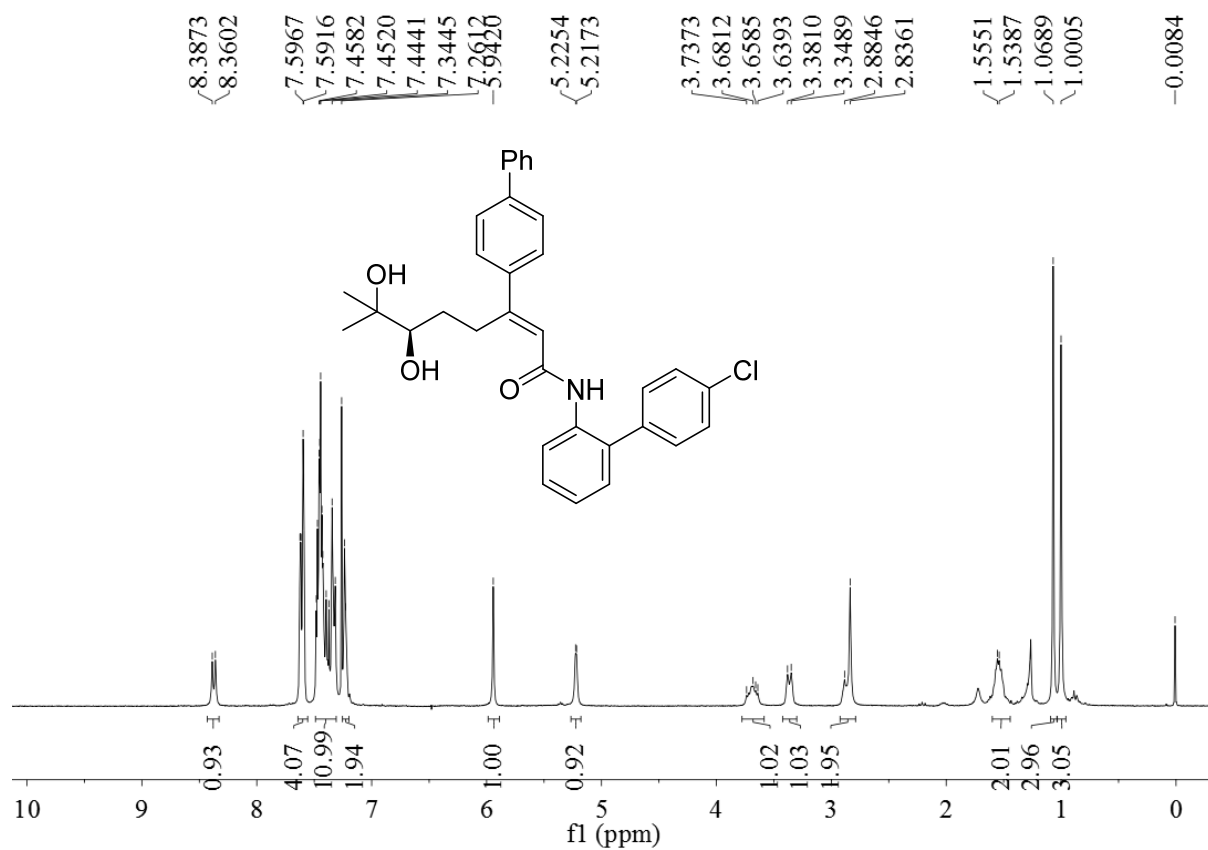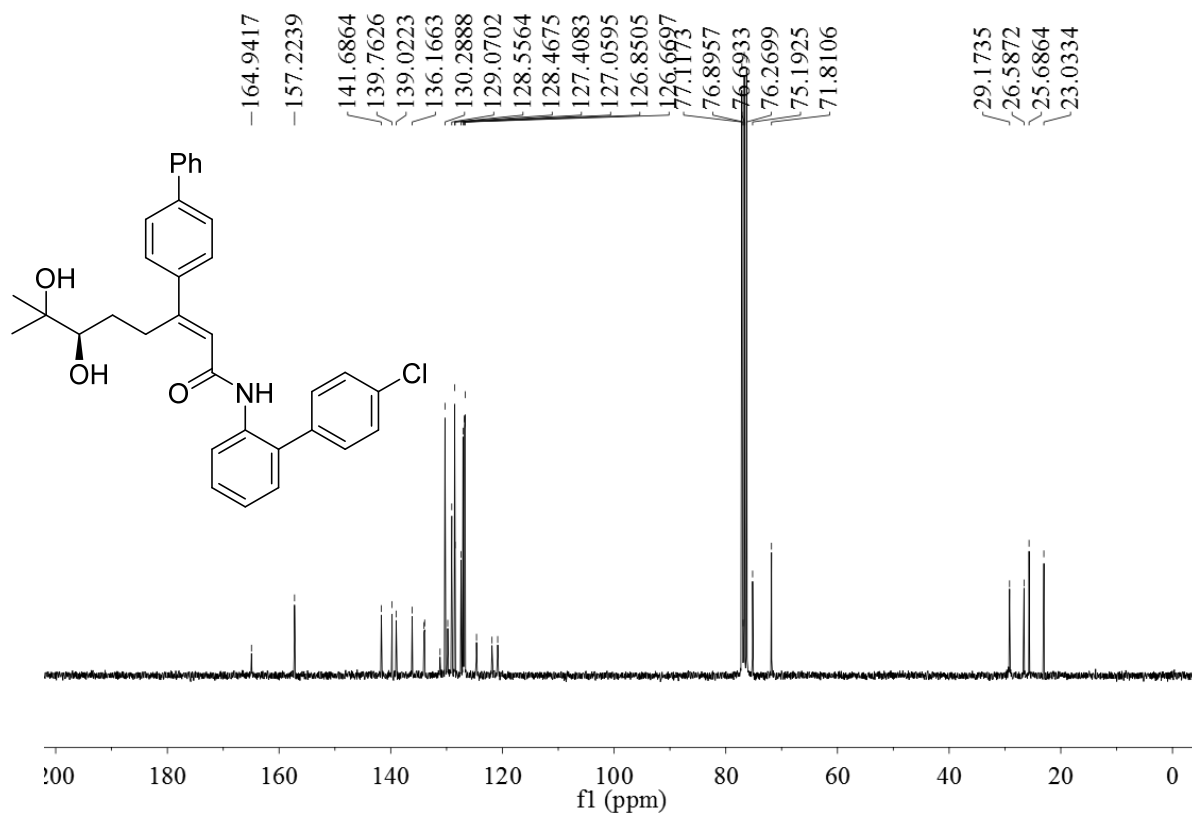

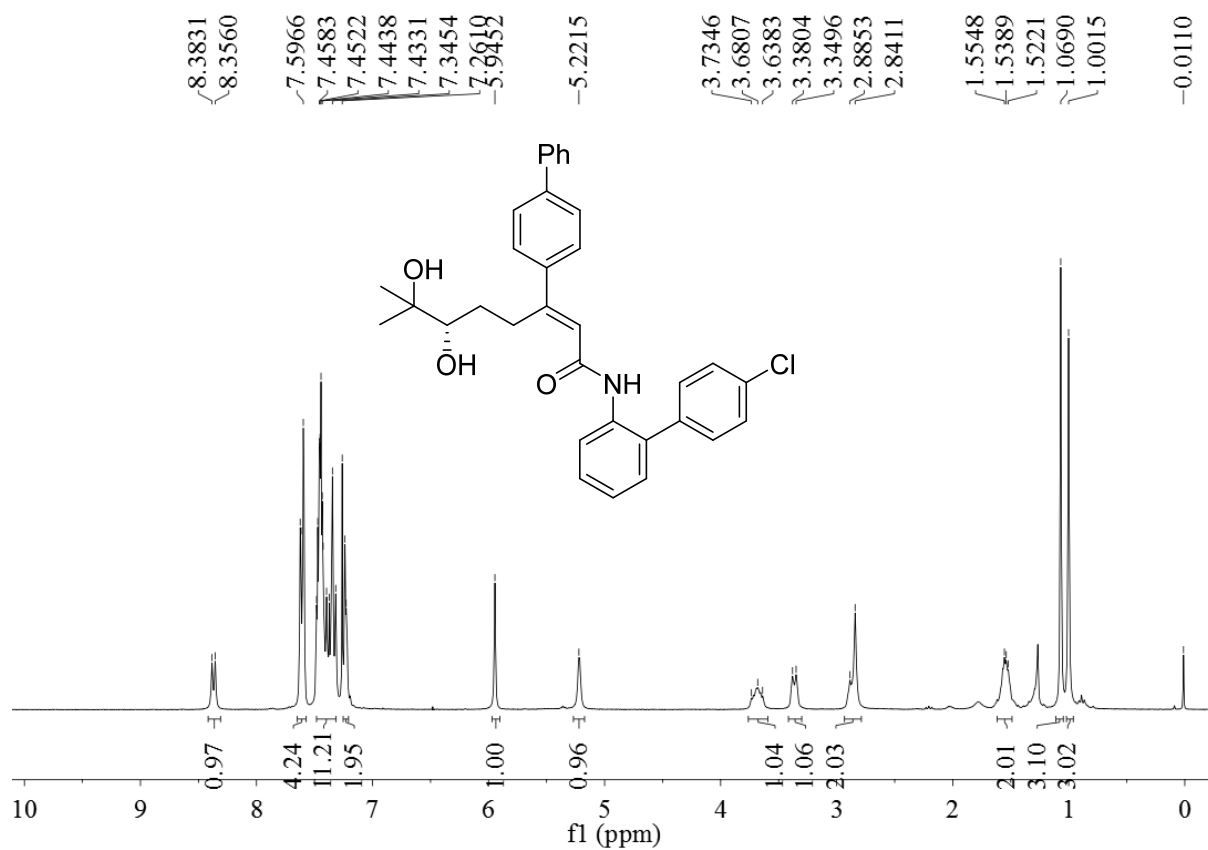

Figure S79. <sup>1</sup>H NMR of Compound (S)-111

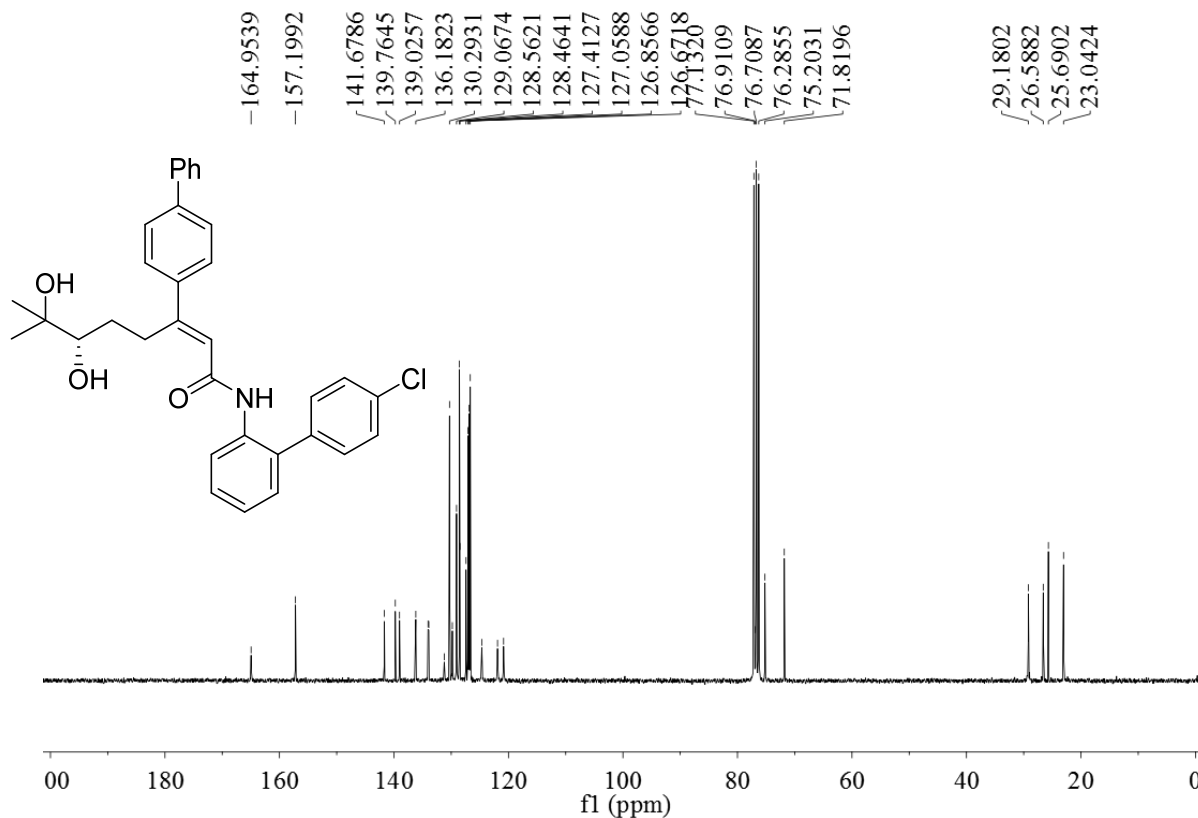

Figure S80. <sup>13</sup>C NMR spectrum of (S)-111

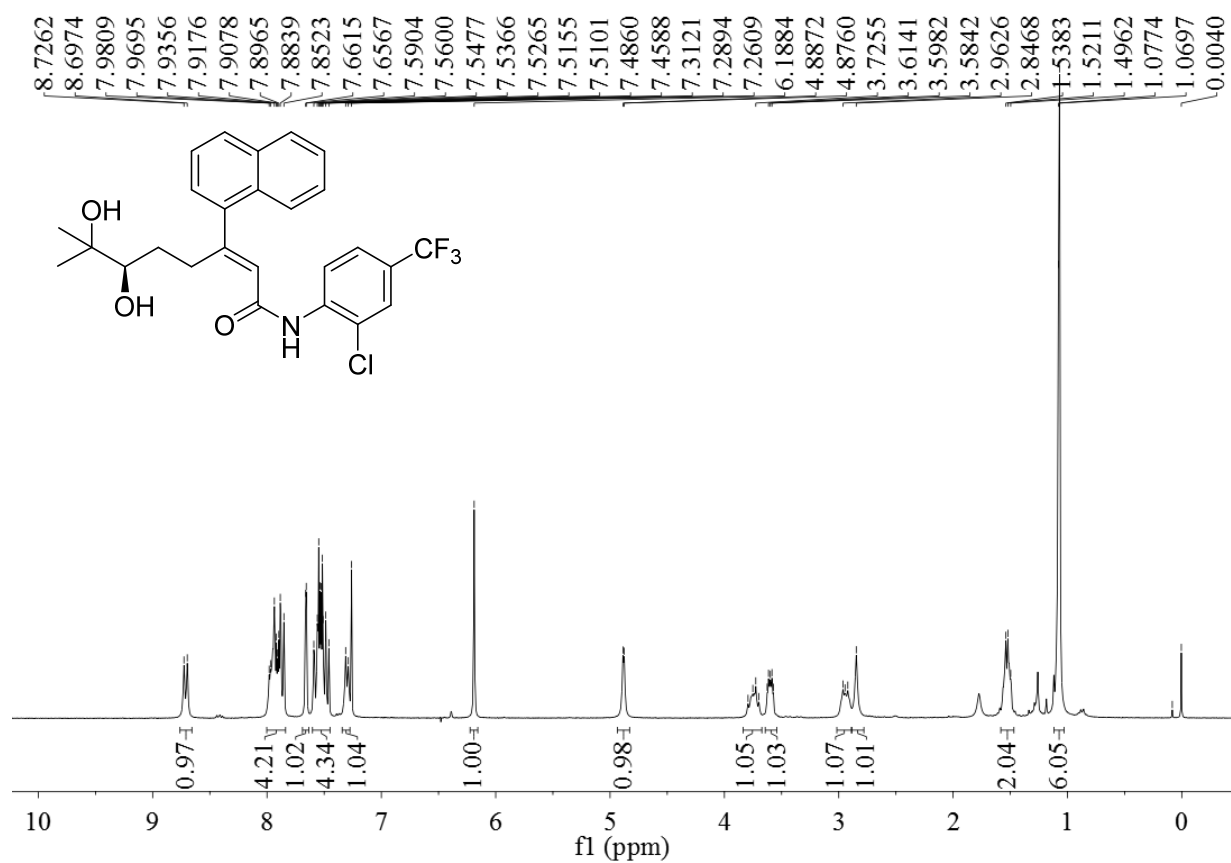

Figure S81. <sup>1</sup>H NMR of Compound (R)-11m

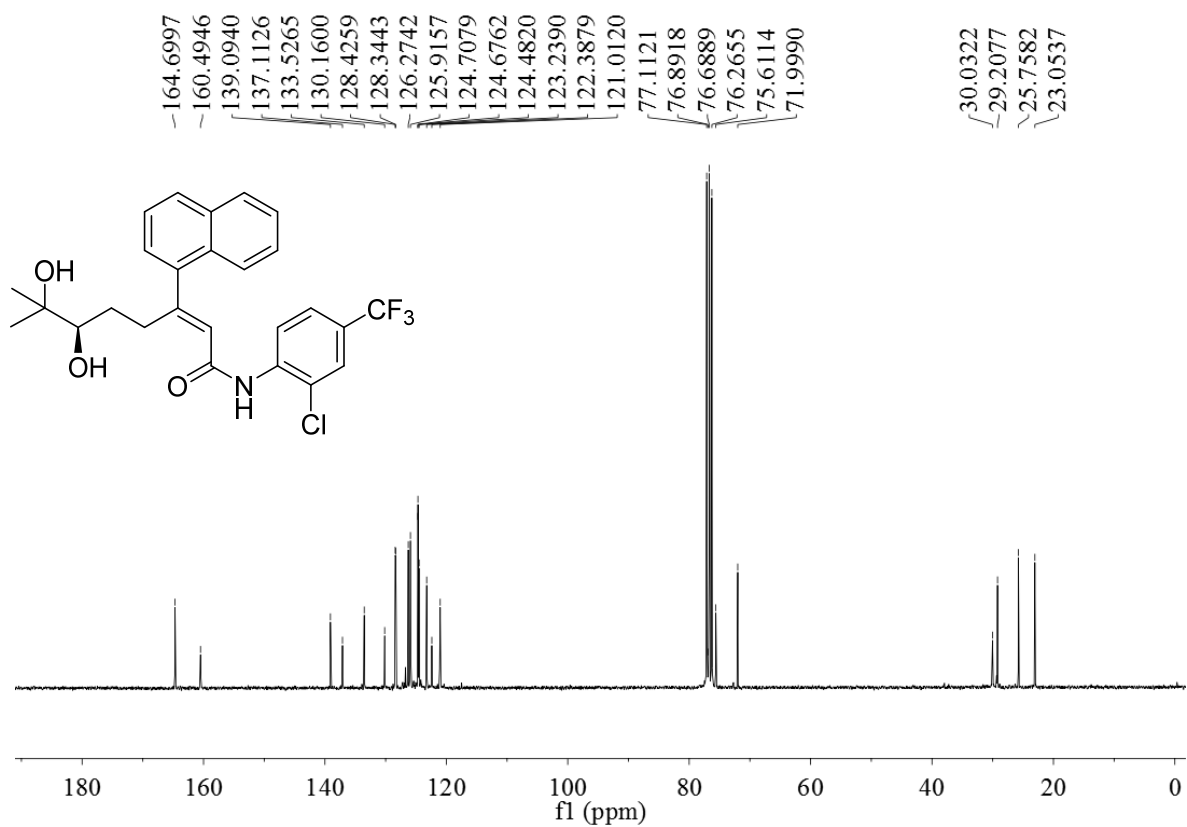

Figure S82. <sup>13</sup>C NMR spectrum of (R)-11m

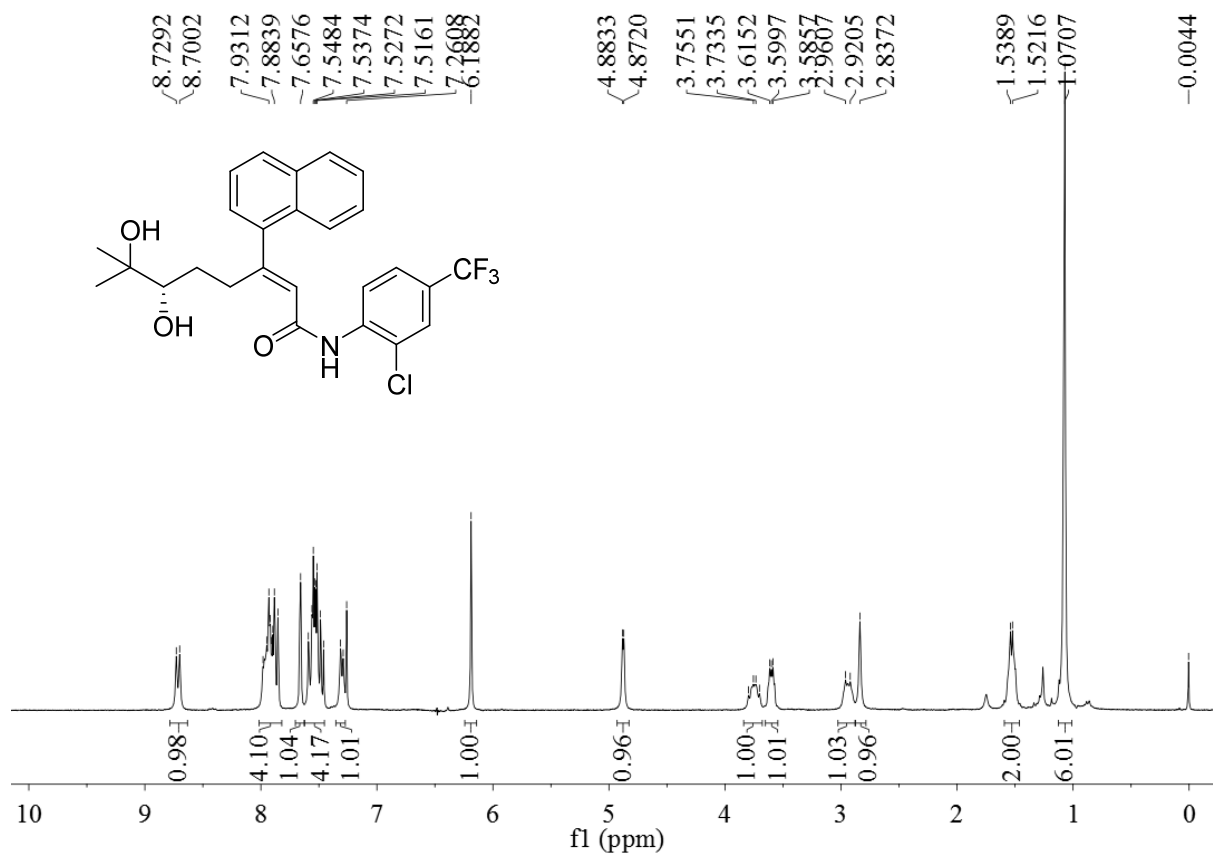

Figure S83. <sup>1</sup>H NMR of Compound (S)-11m

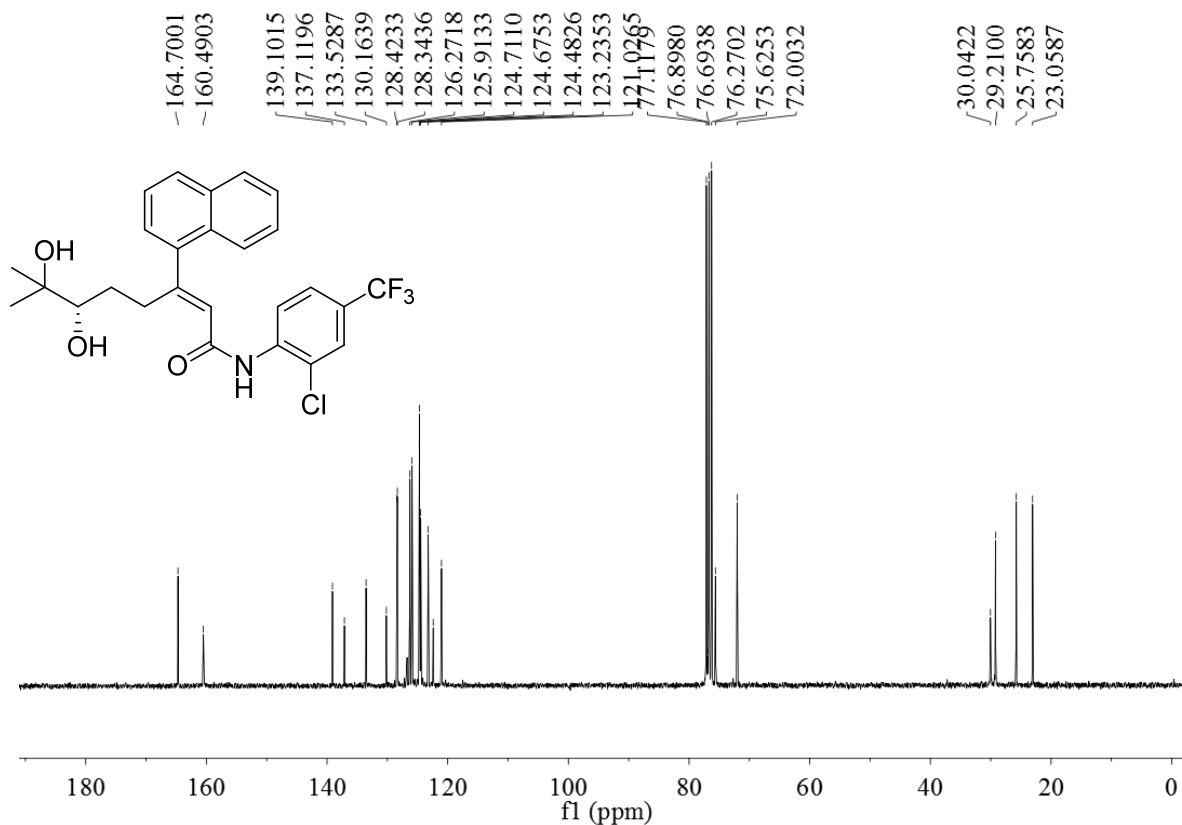

Figure S84. <sup>13</sup>C NMR spectrum of (S)-11m

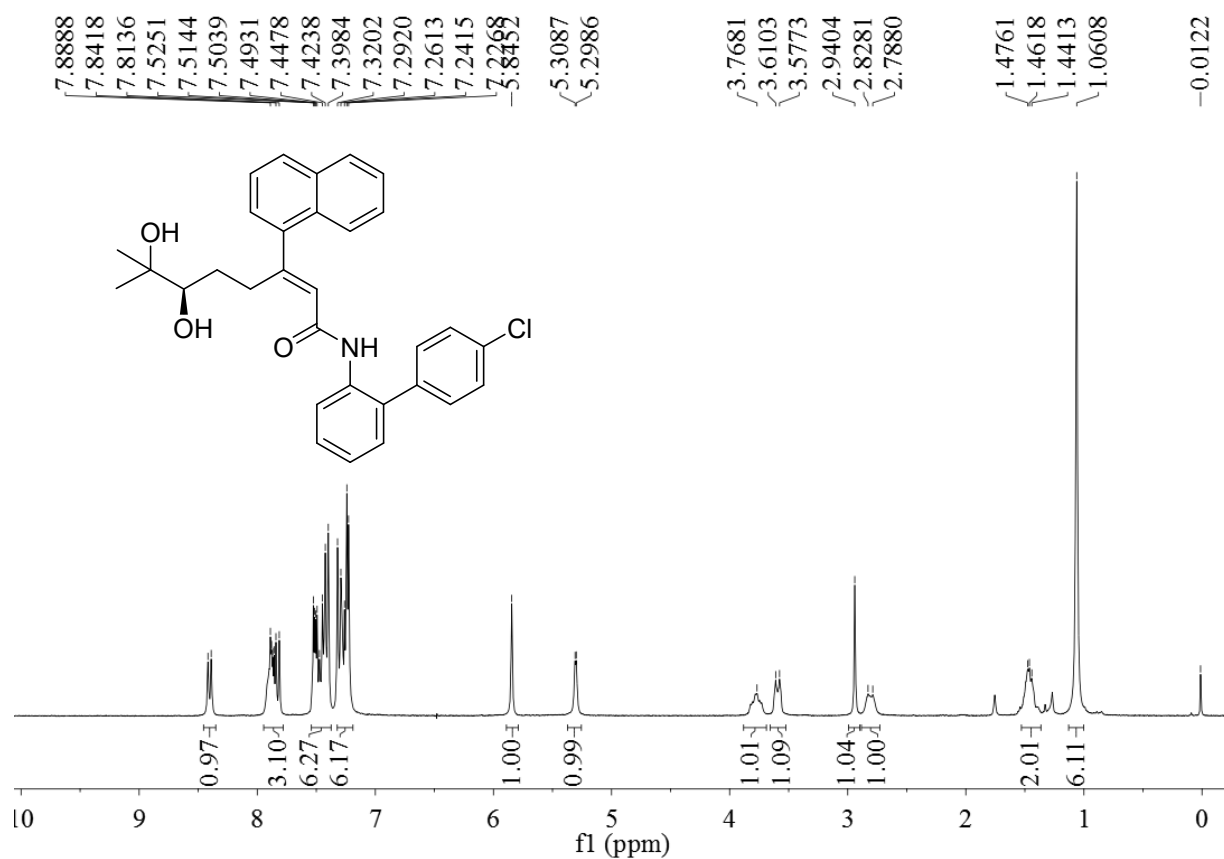

Figure S85. <sup>1</sup>H NMR of Compound (R)-11n

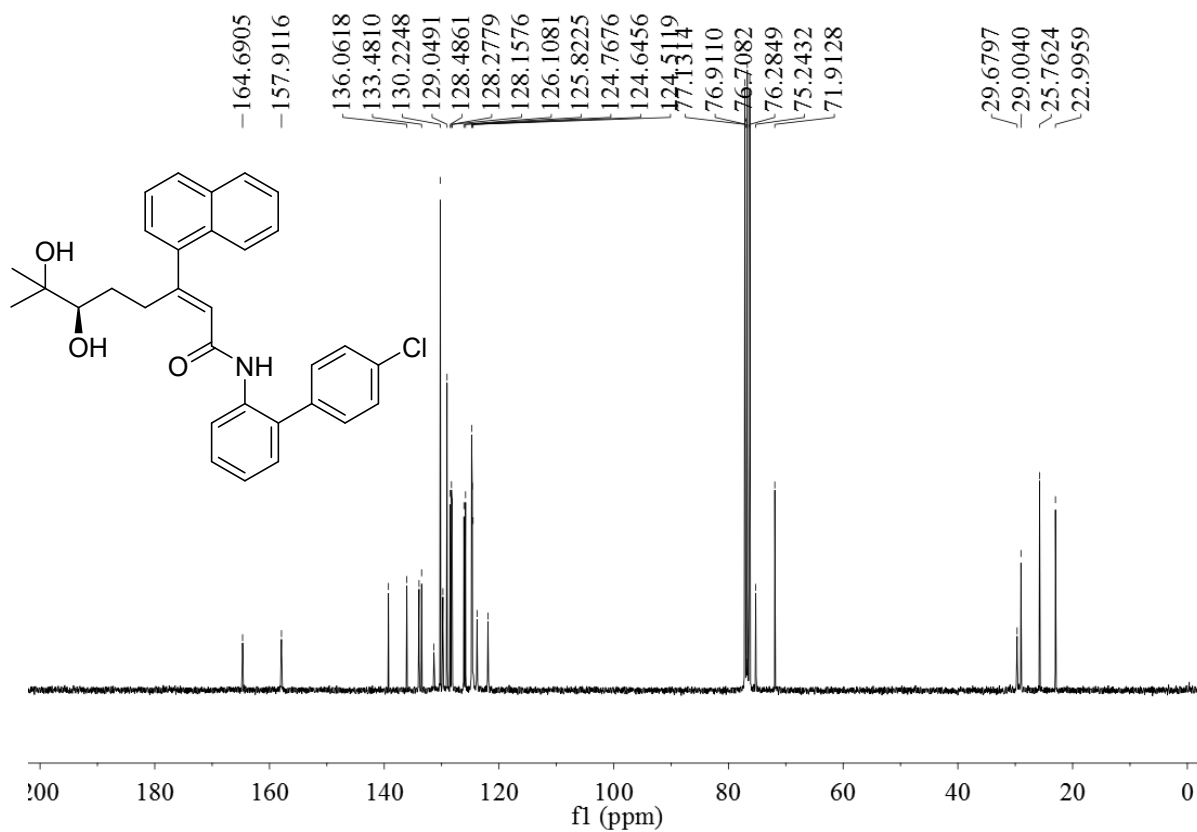

Figure S86. <sup>13</sup>C NMR spectrum of (R)-11n

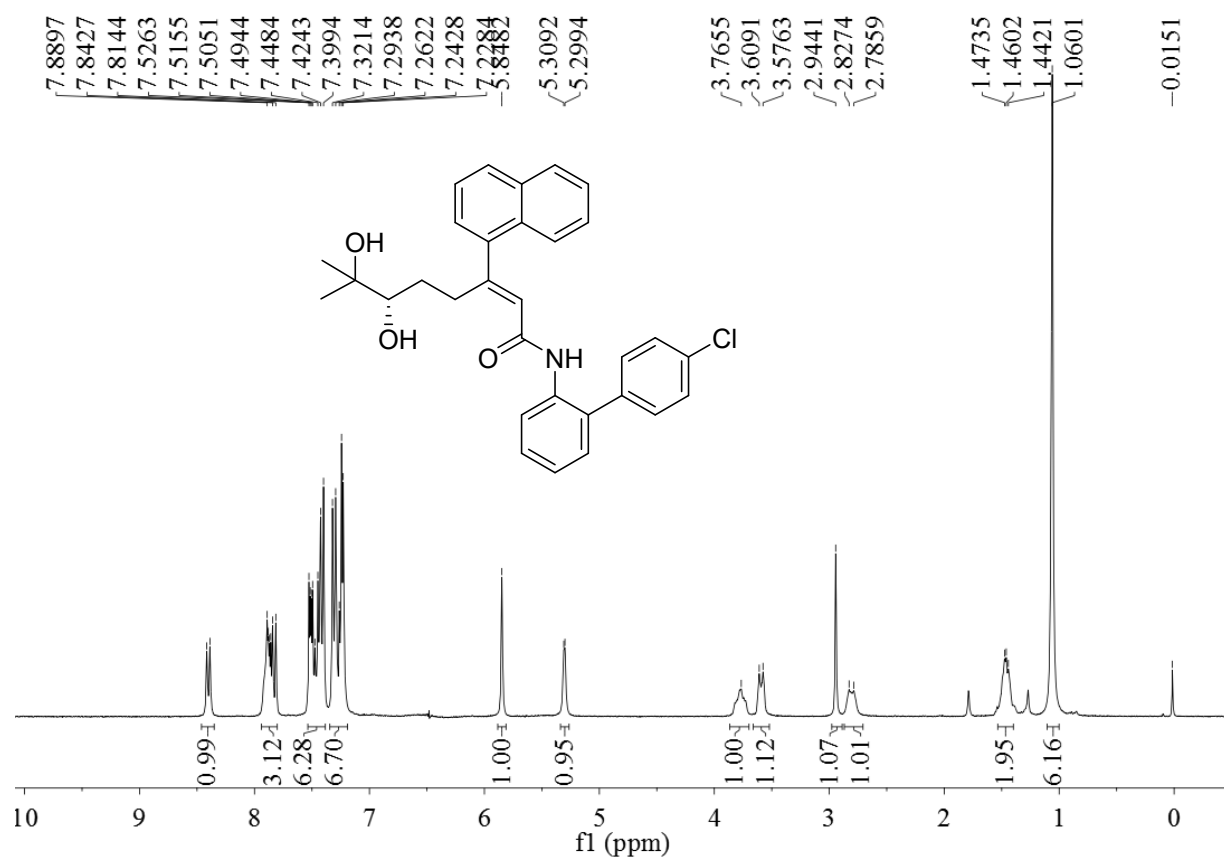

Figure S87. <sup>1</sup>H NMR of Compound (S)-11n

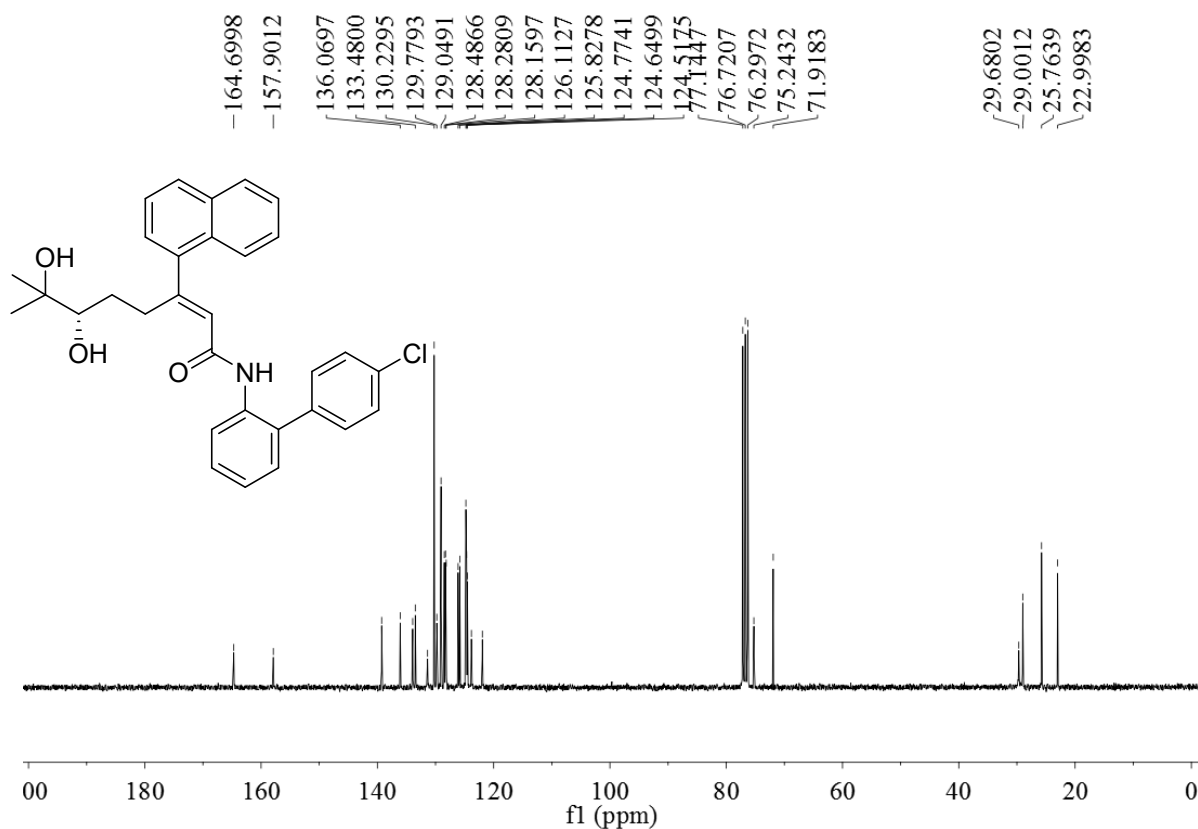

Figure S88. <sup>13</sup>C NMR spectrum of (S)-11n

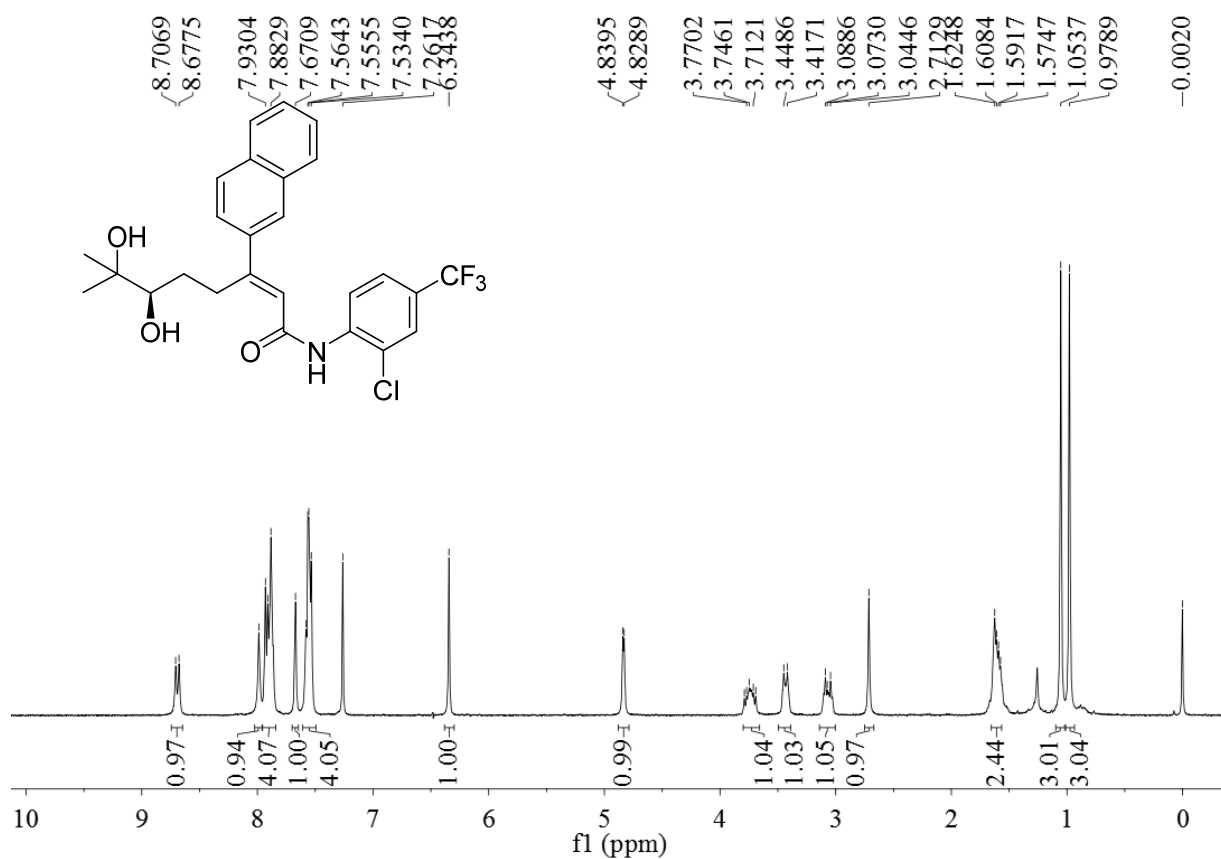

Figure S89. <sup>1</sup>H NMR of Compound (R)-11o

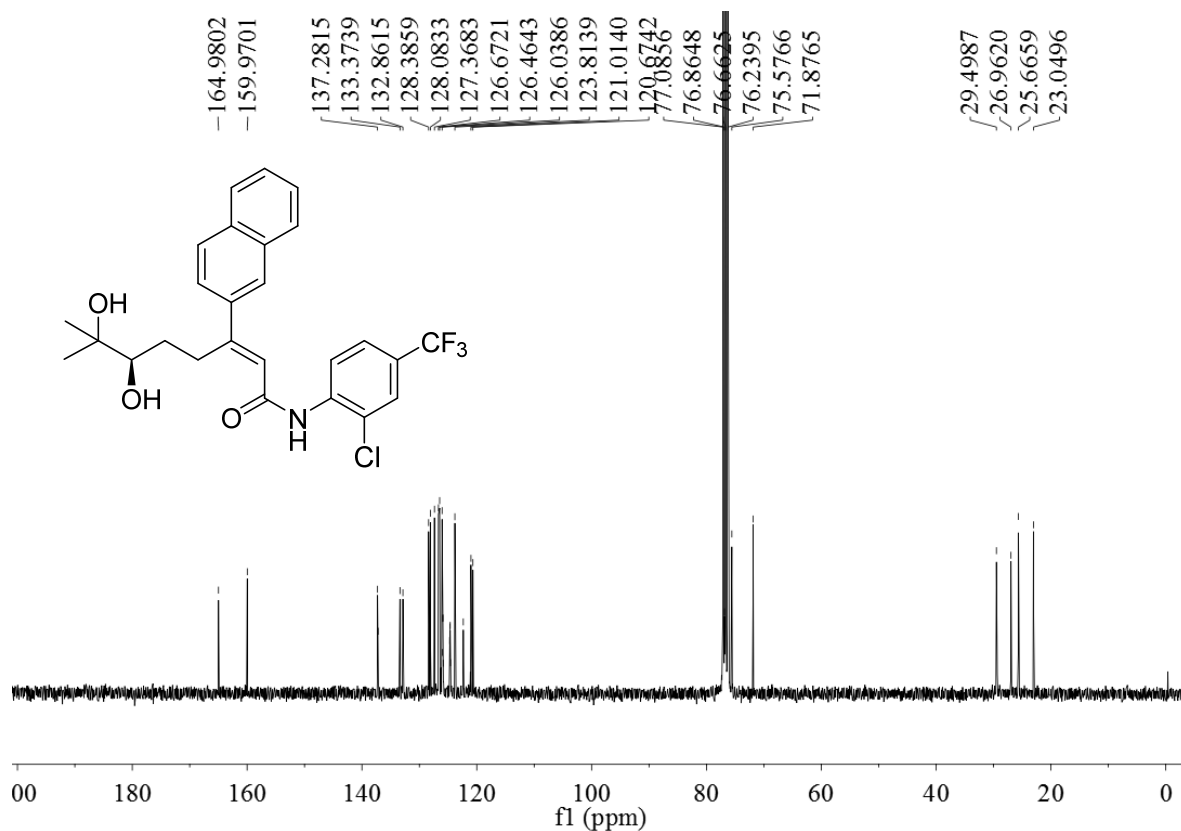

Figure S90. <sup>13</sup>C NMR spectrum of (R)-11o

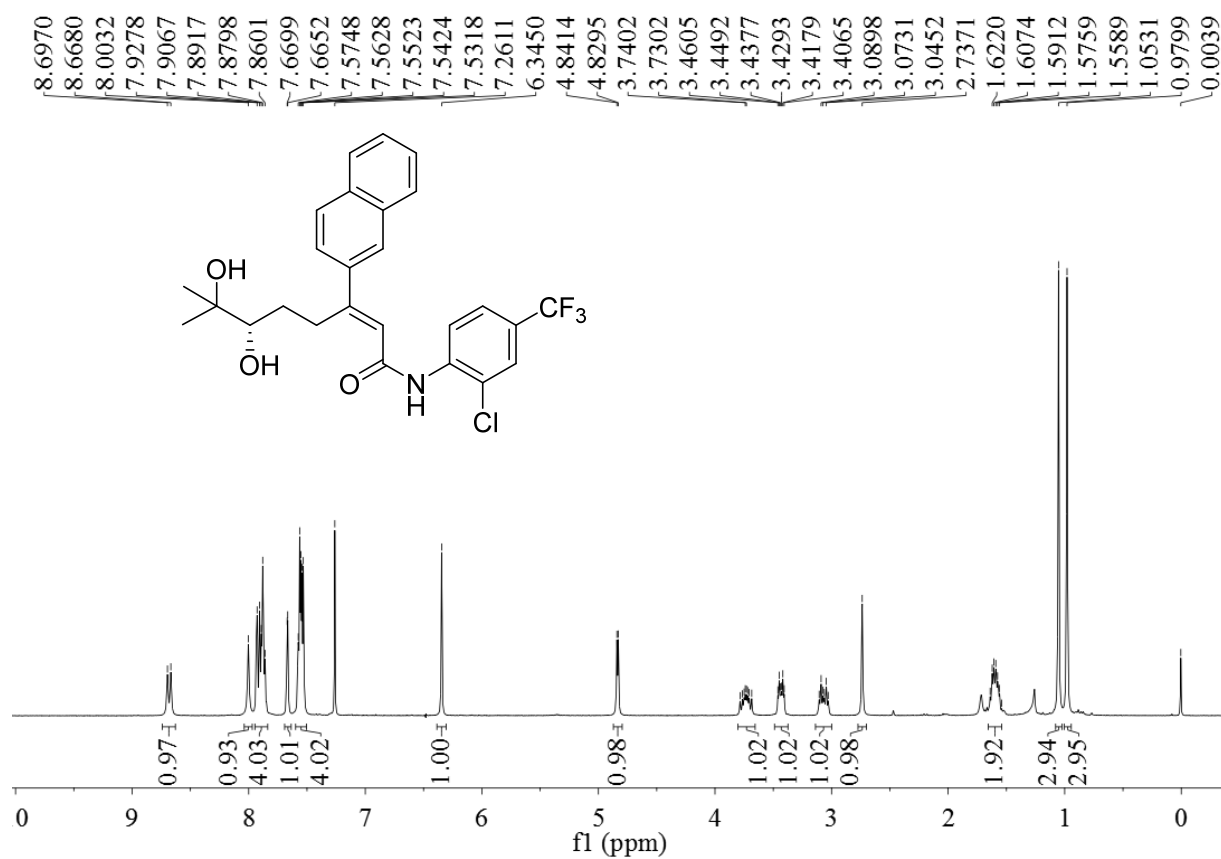

Figure S91. <sup>1</sup>H NMR of Compound (S)-11o

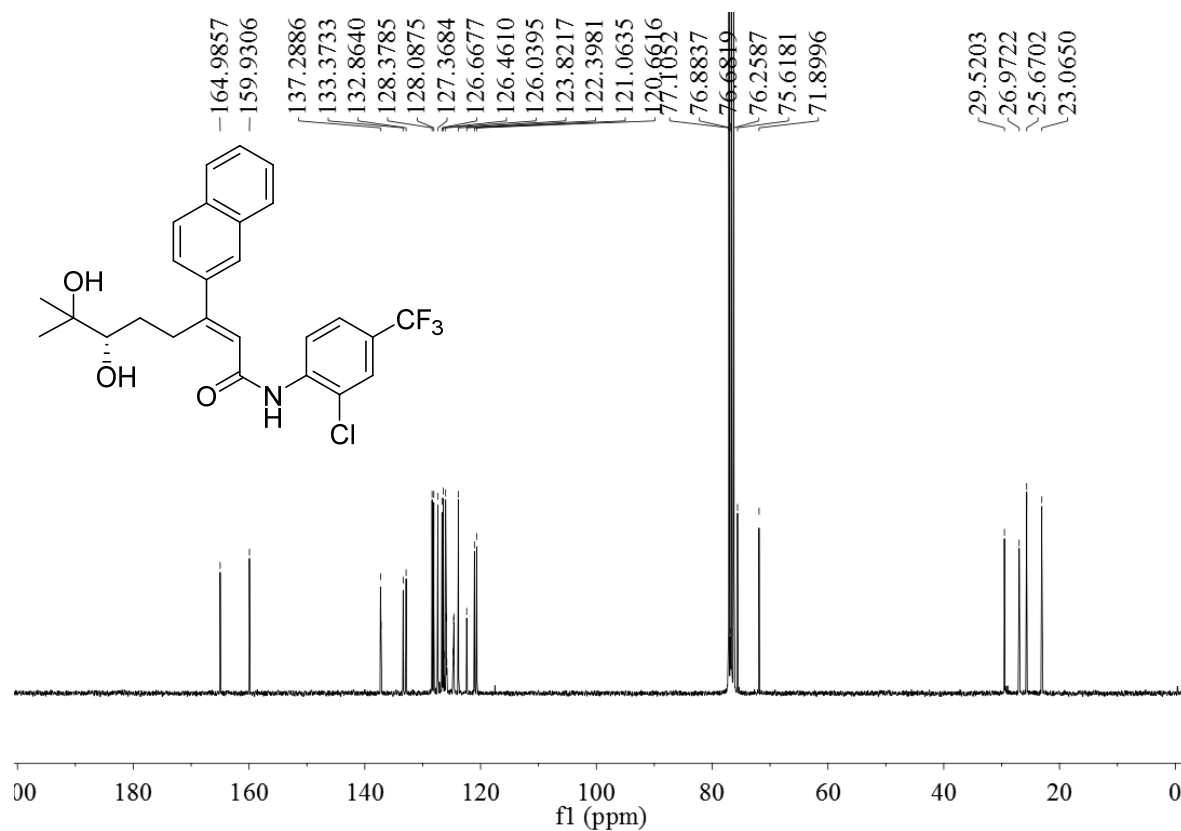

Figure S92. <sup>13</sup>C NMR spectrum of (S)-11o

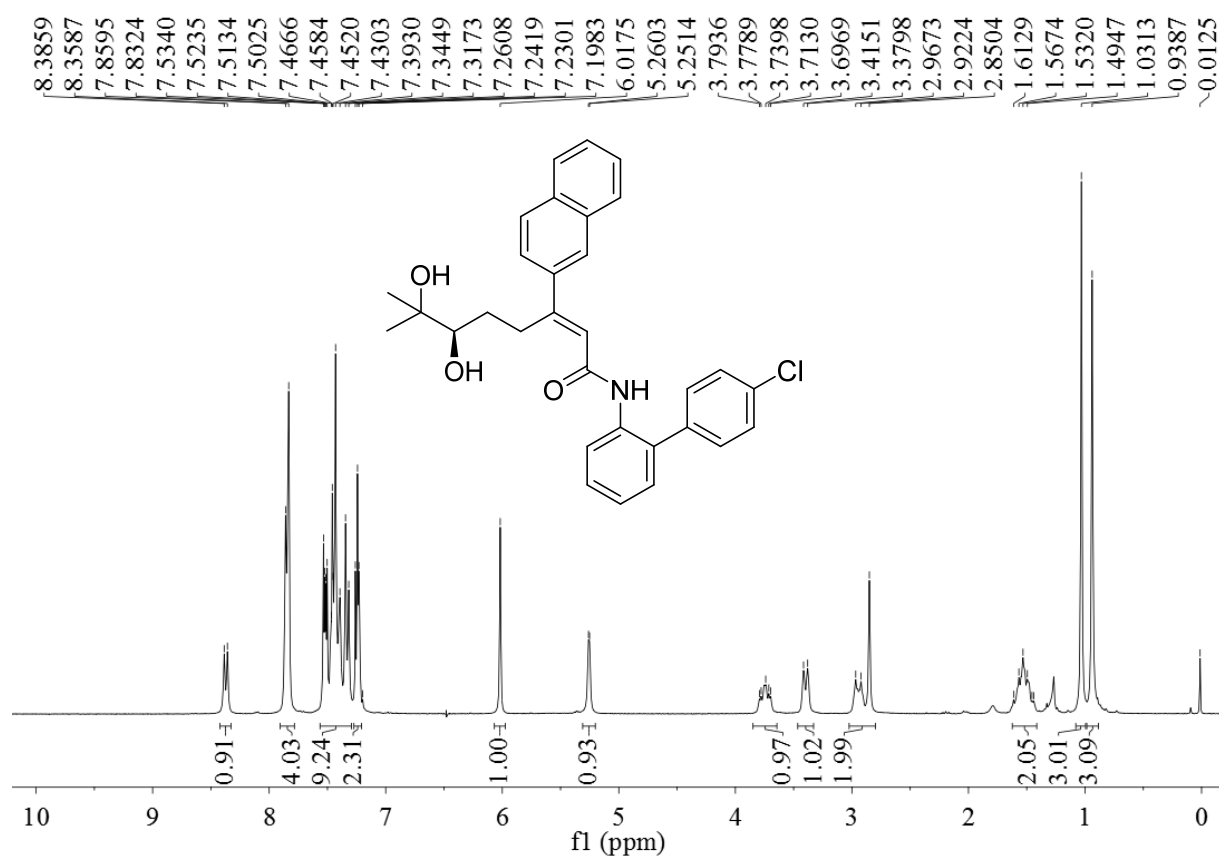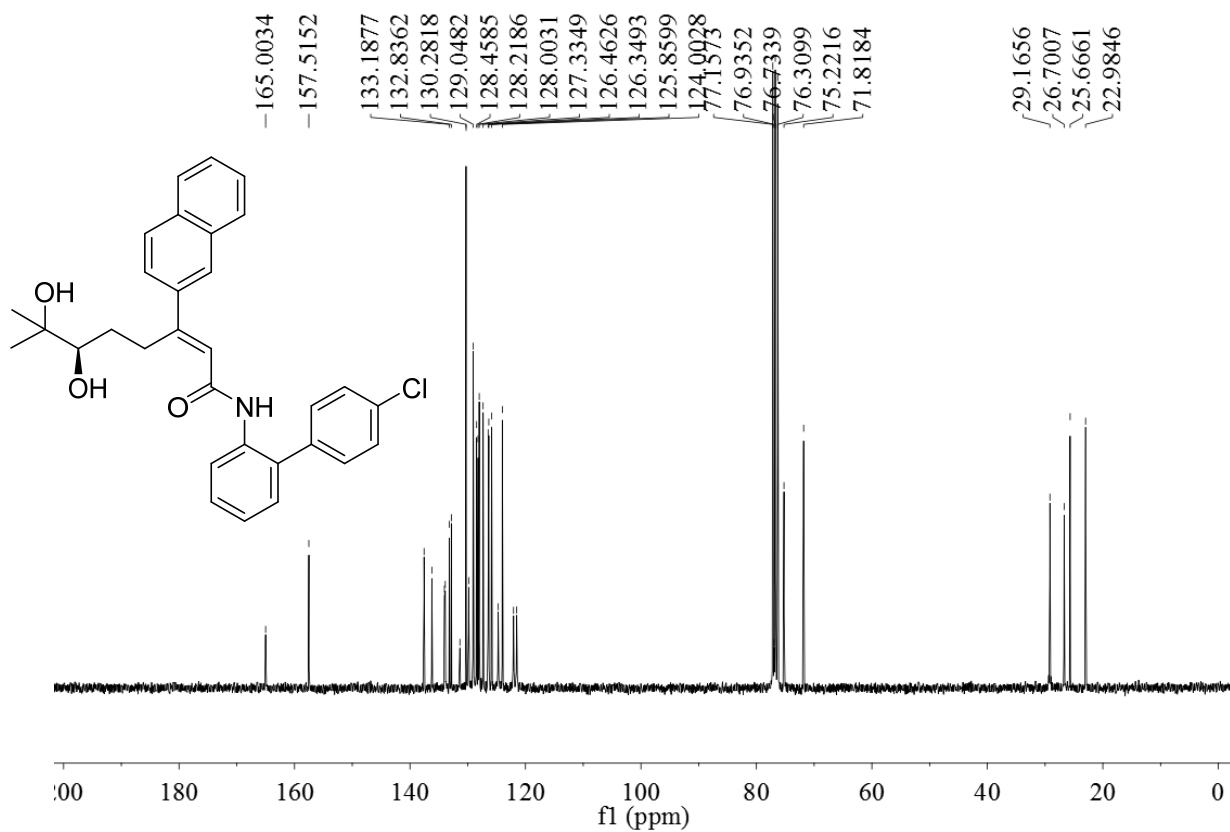

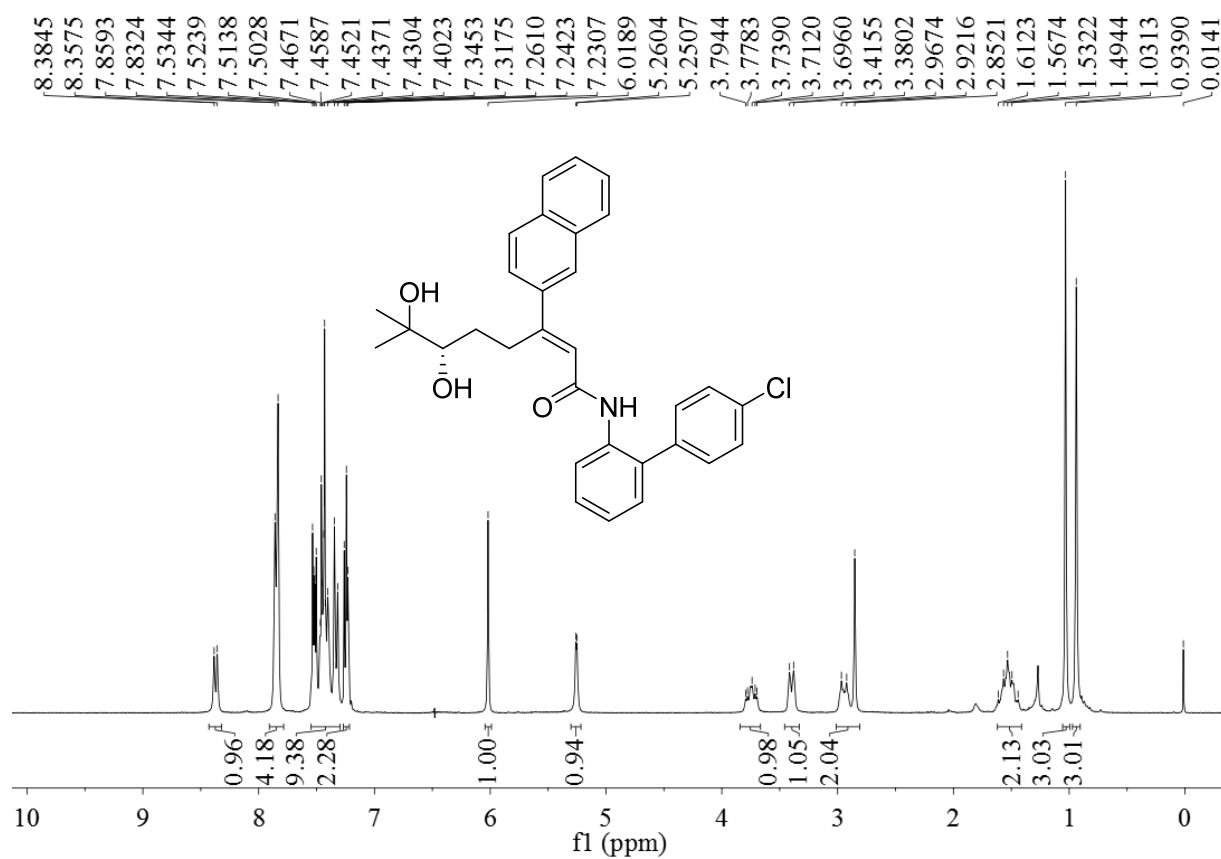

Figure S95. <sup>1</sup>H NMR of Compound (S)-11p

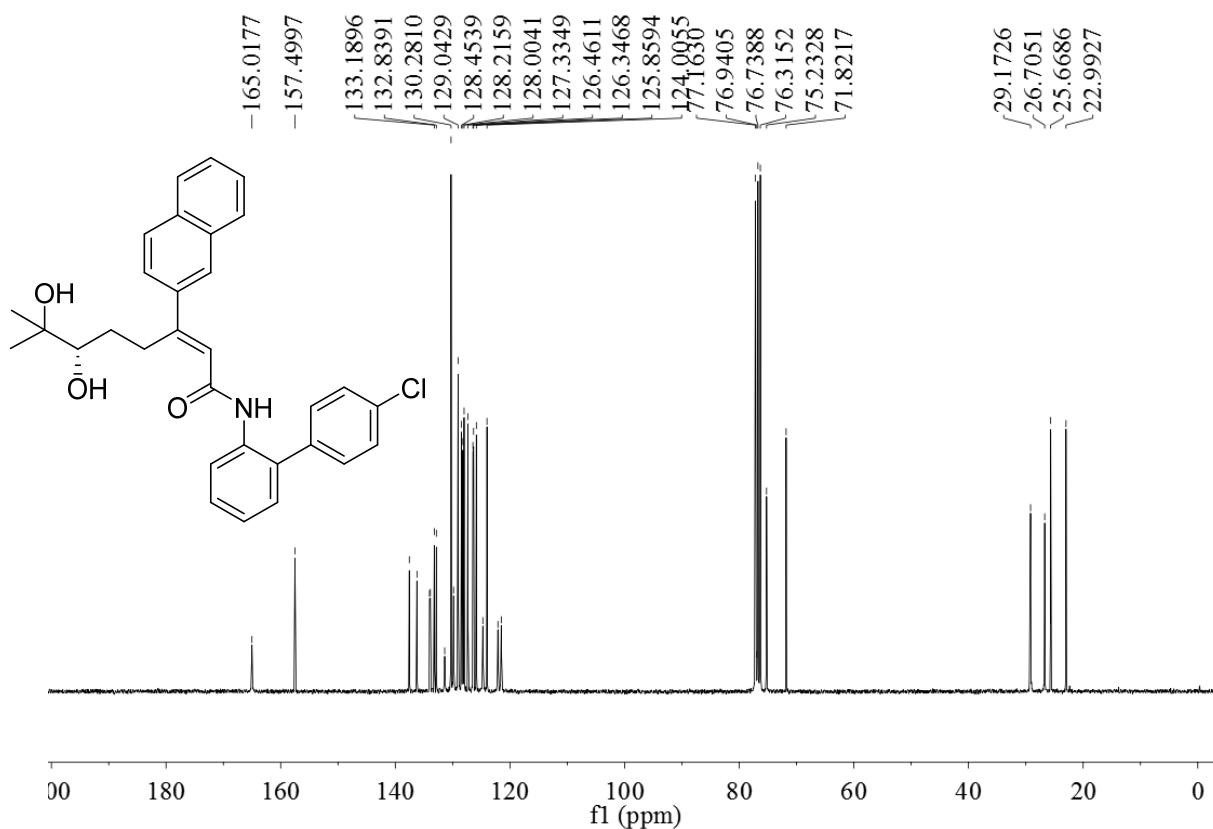

Figure S96. <sup>13</sup>C NMR spectrum of (S)-11p

## 2. HPLC profiles of 5 representative compounds

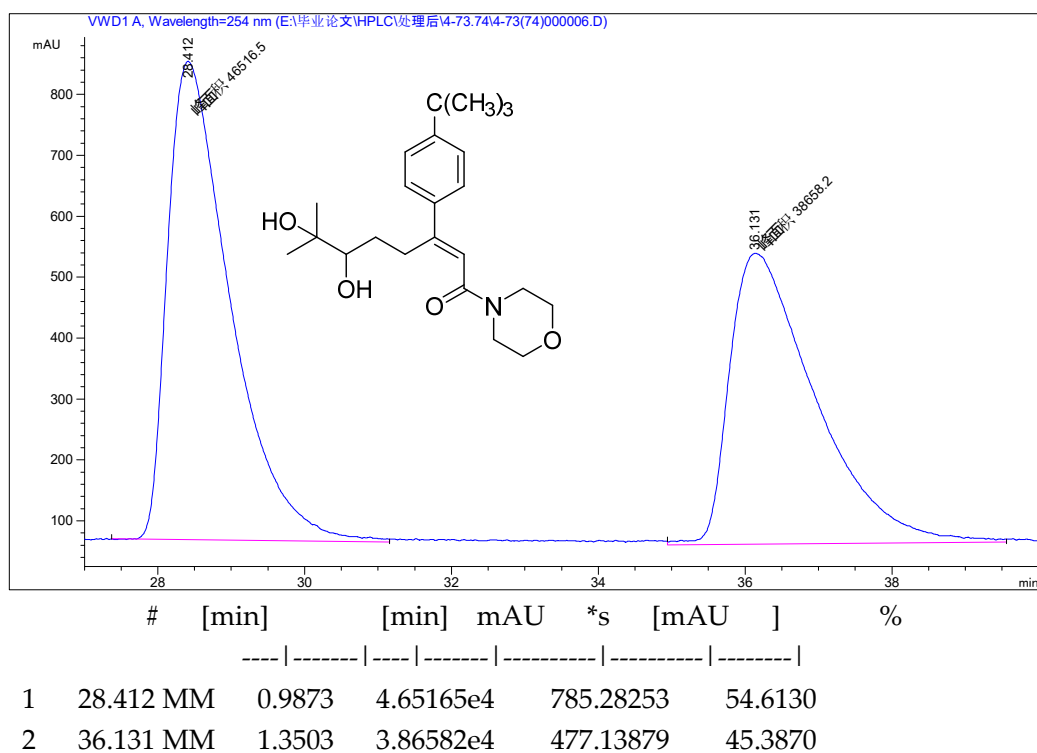

Figure S97. HPLC profile of racemic 11a

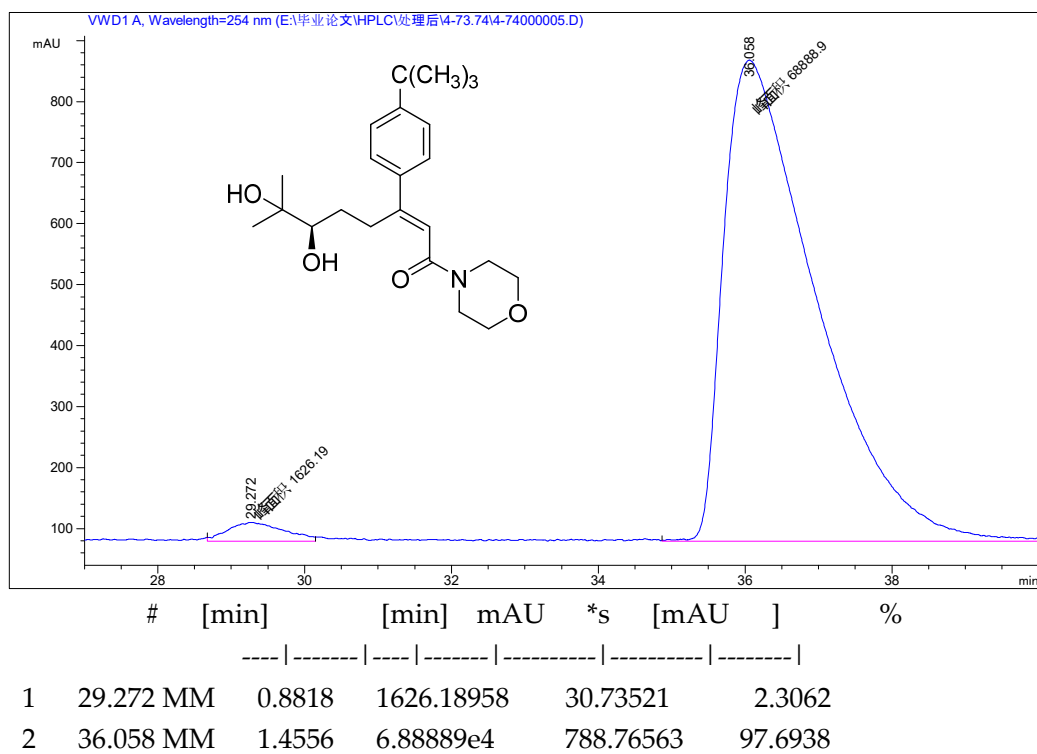

Figure S98. HPLC profile of (R)-11a

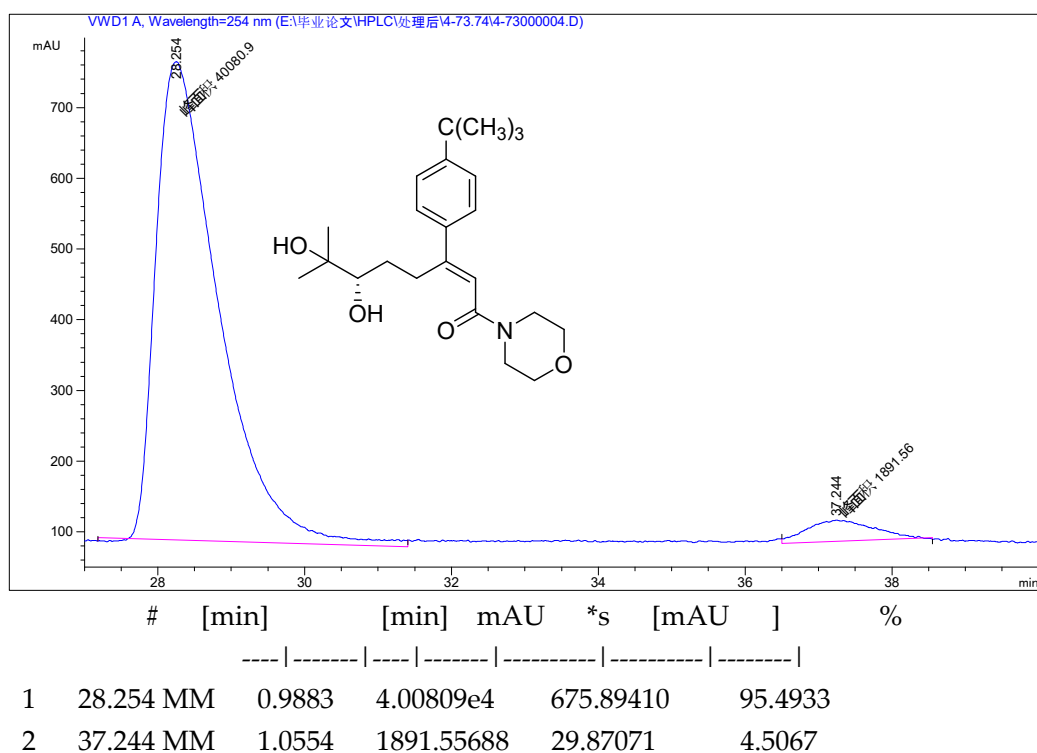

**Figure S99.** HPLC profile of (S)-11a

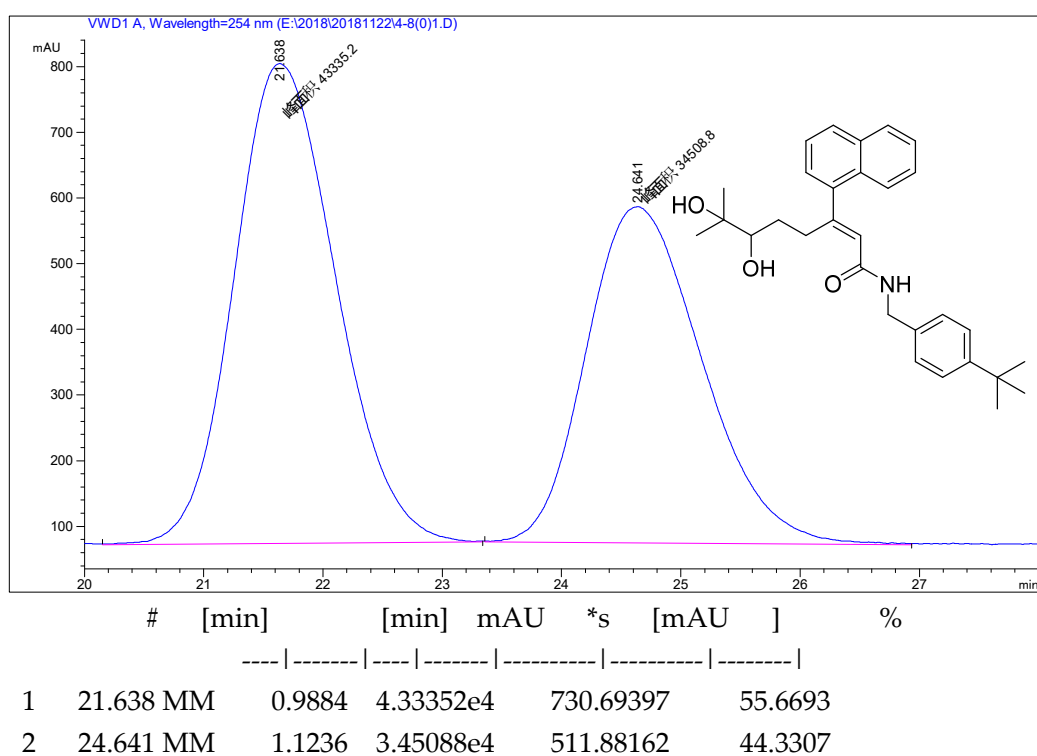

**Figure S100.** HPLC profile of racemic 11f

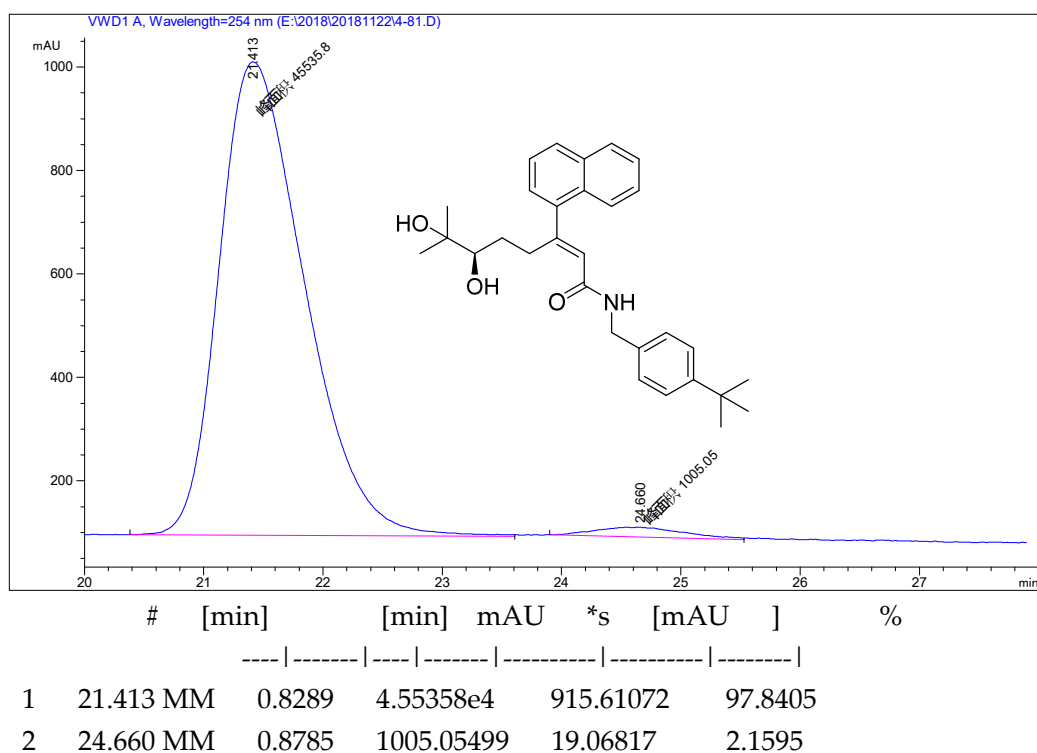

**Figure S101.** HPLC profile of (R)-11f

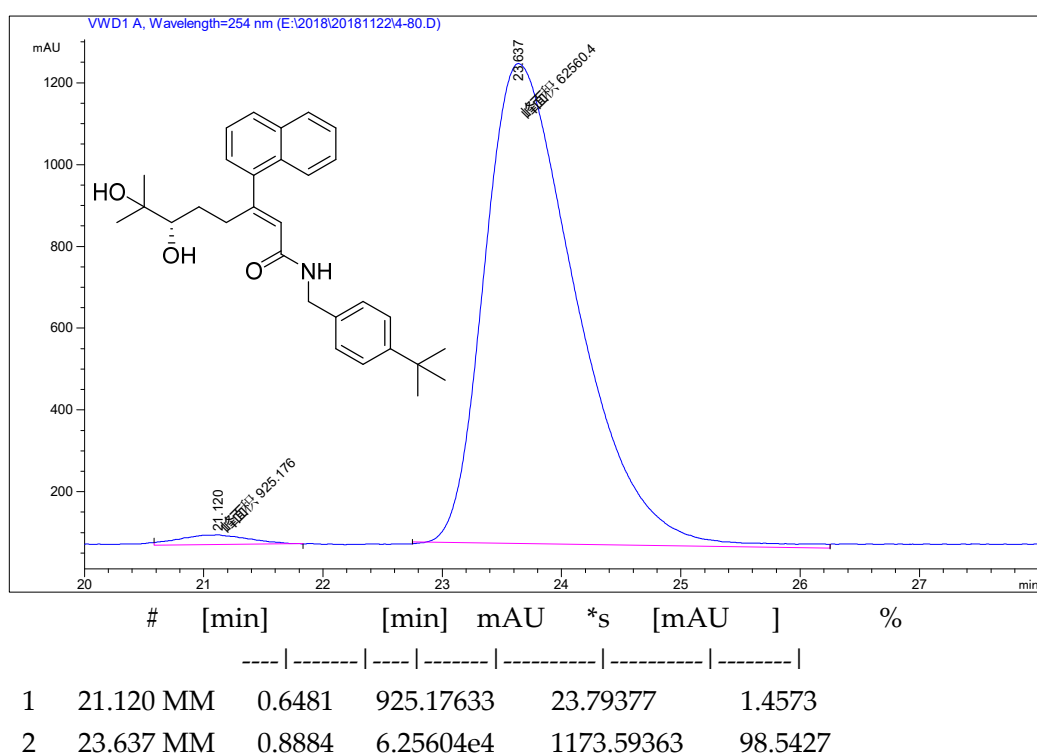

**Figure S102.** HPLC profile of (S)-11f

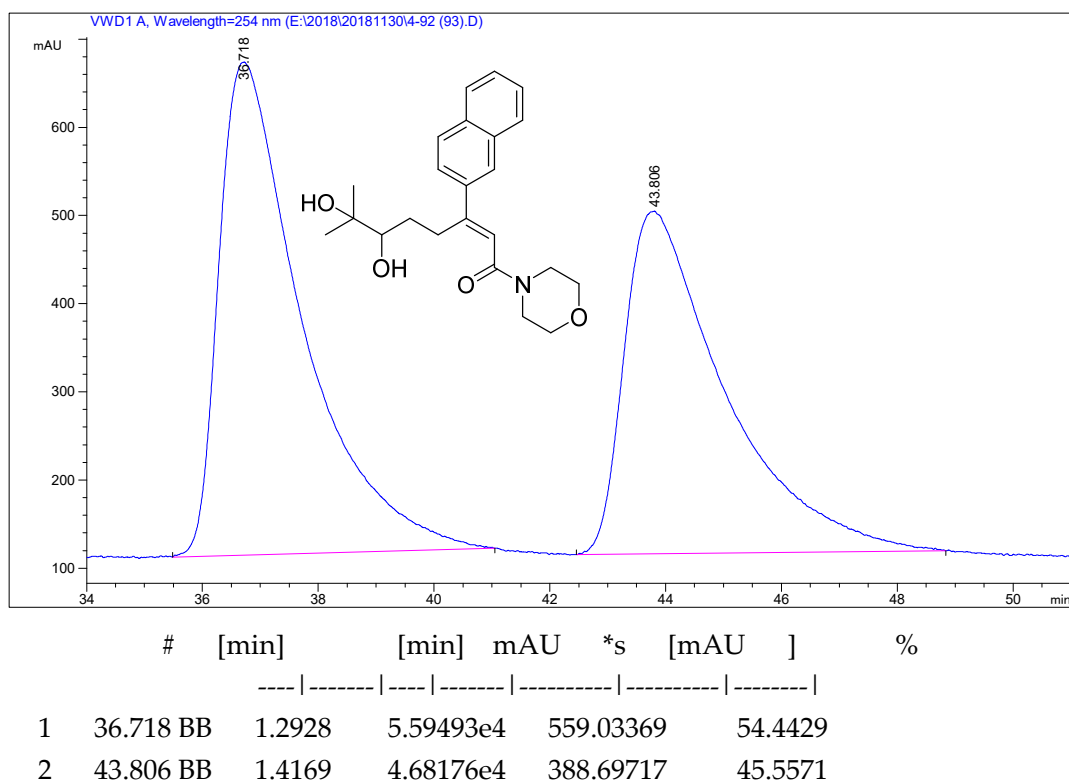

**Figure S103.** HPLC profile of racemic **11g**

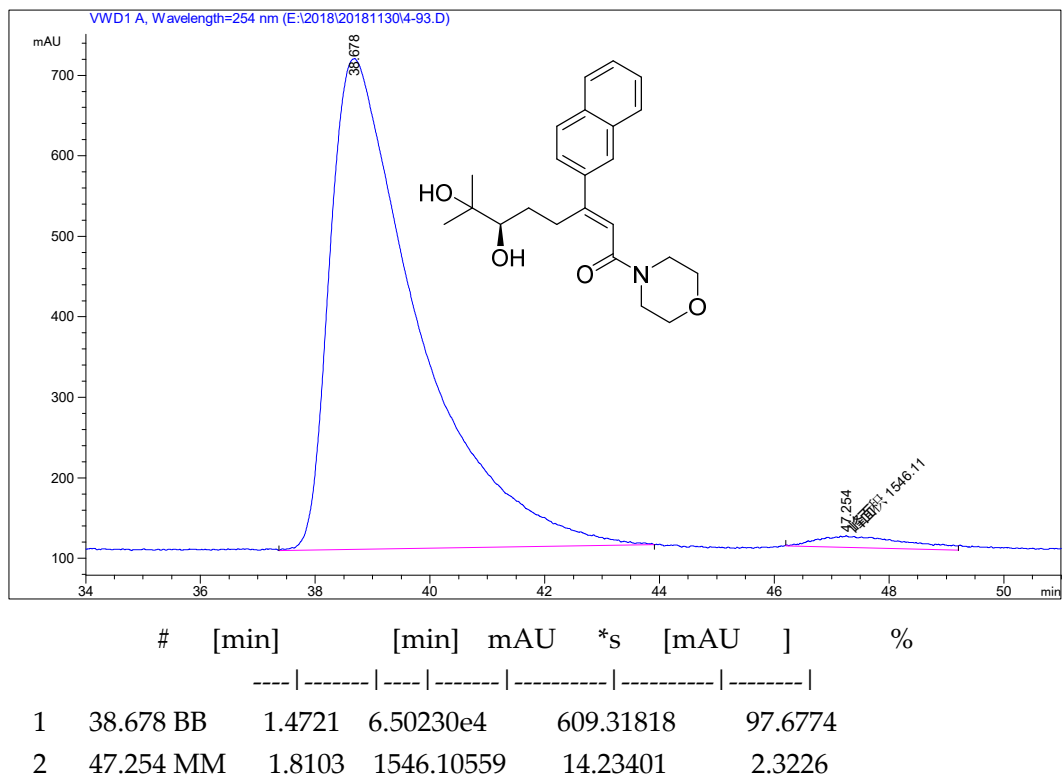

**Figure S104.** HPLC profile of (*R*)-**11g**

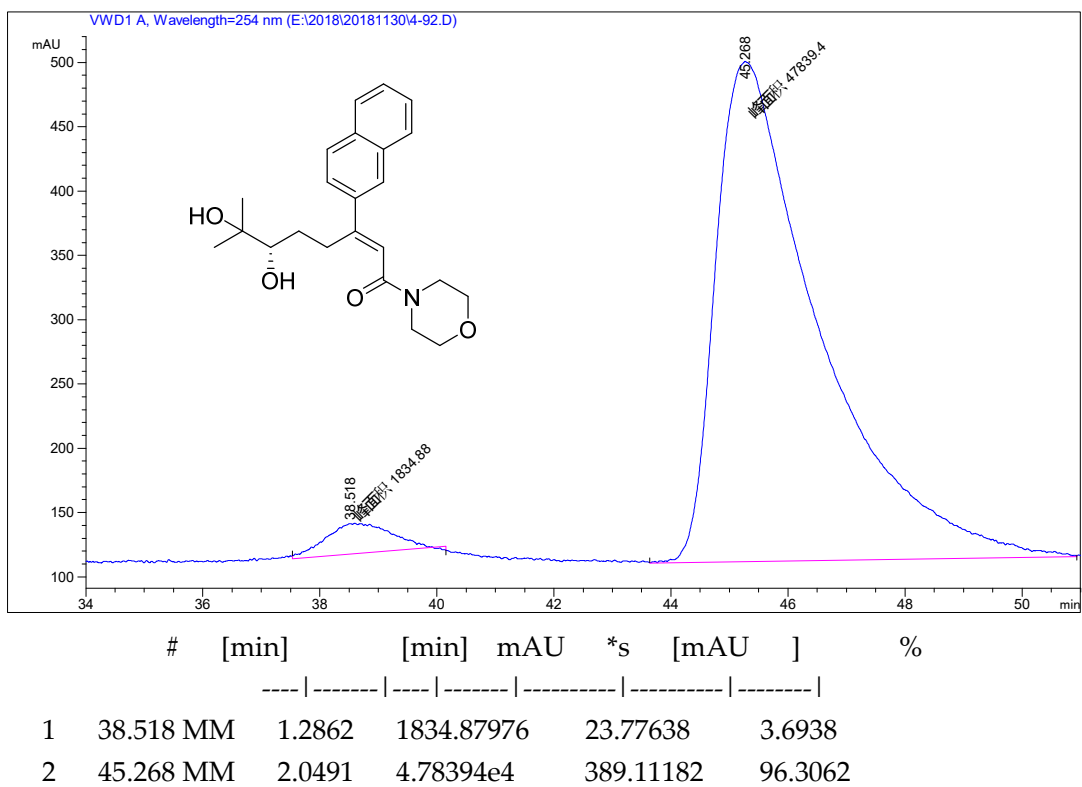

Figure S105. HPLC profile of (S)-11g

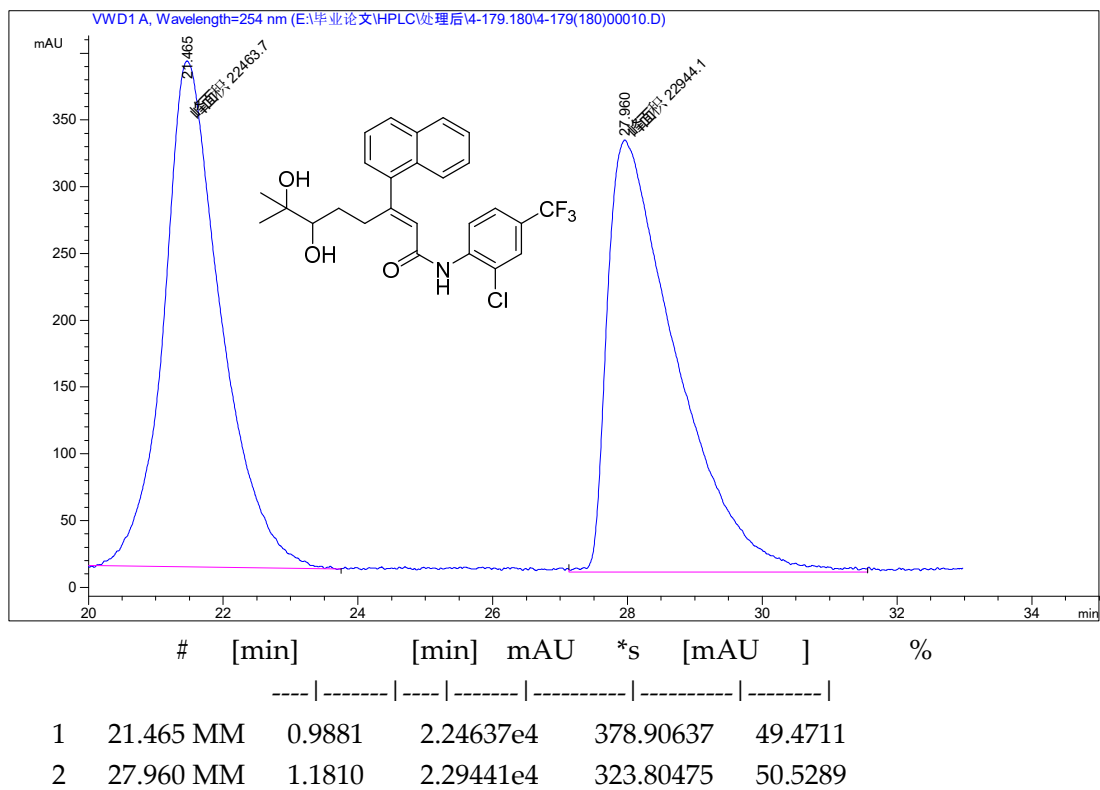

Figure S106. HPLC profile of racemic 11m

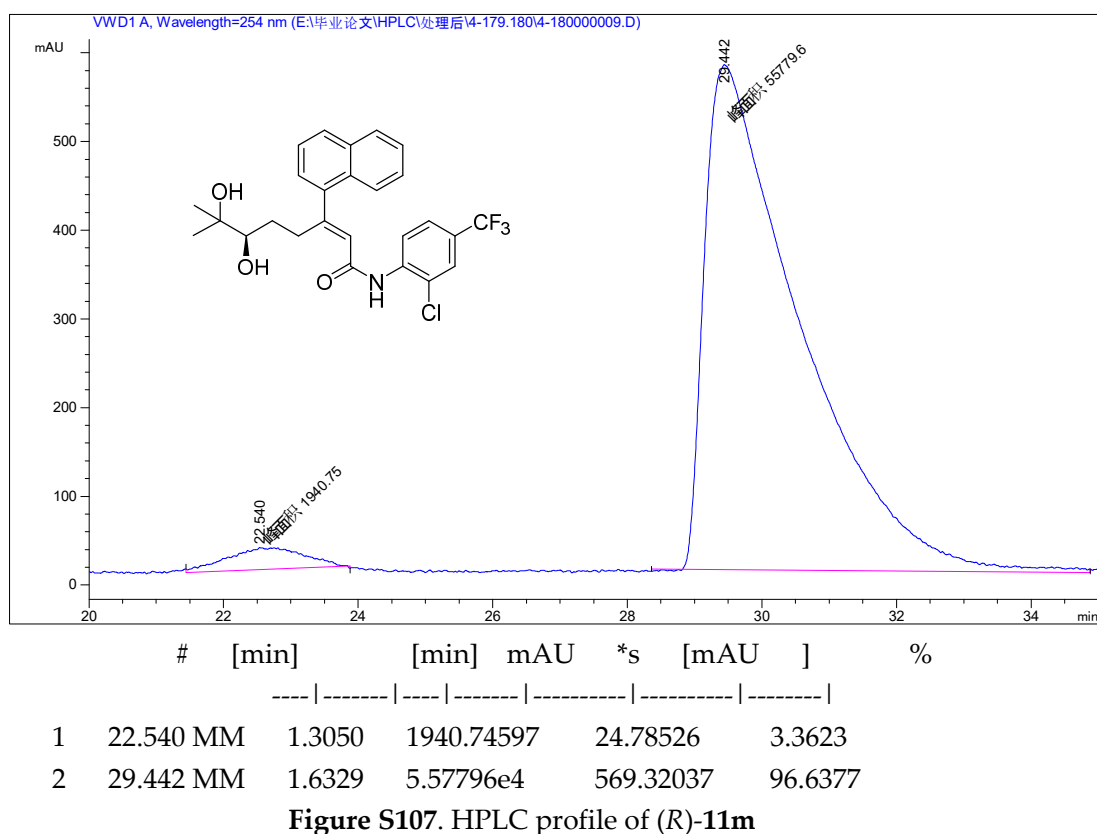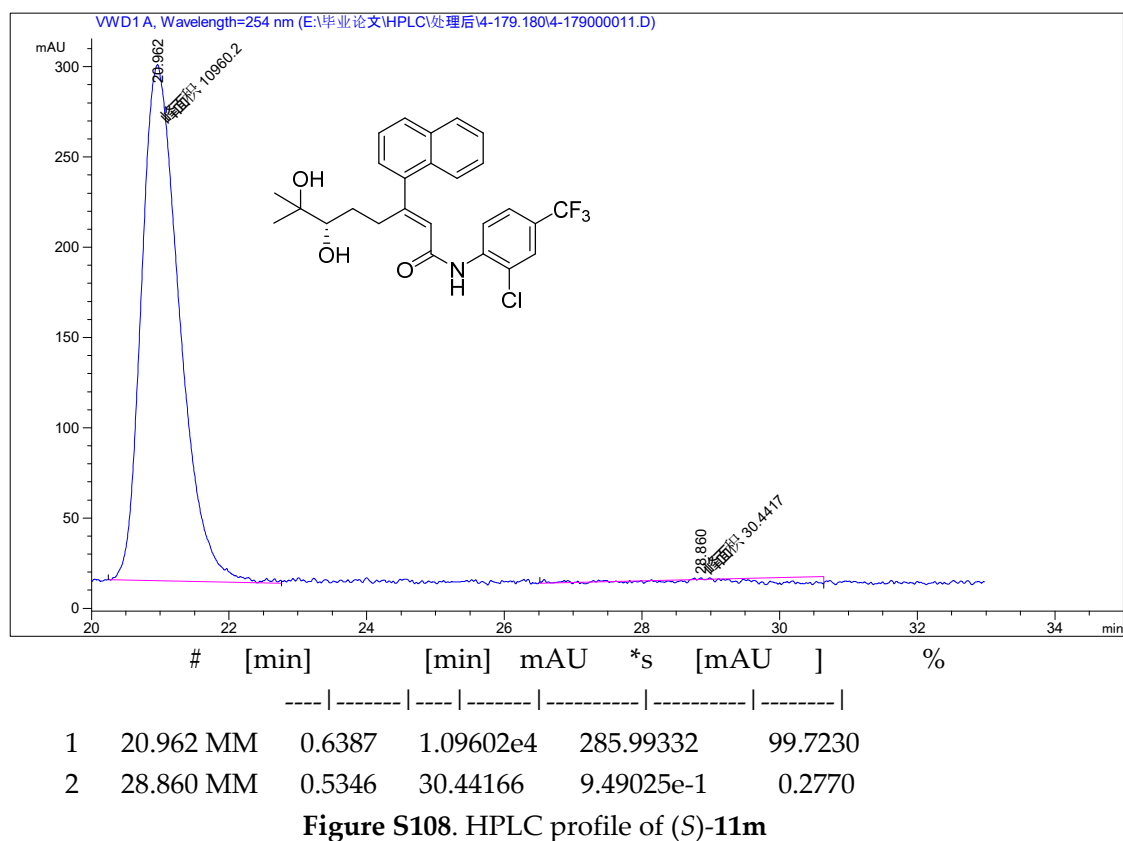

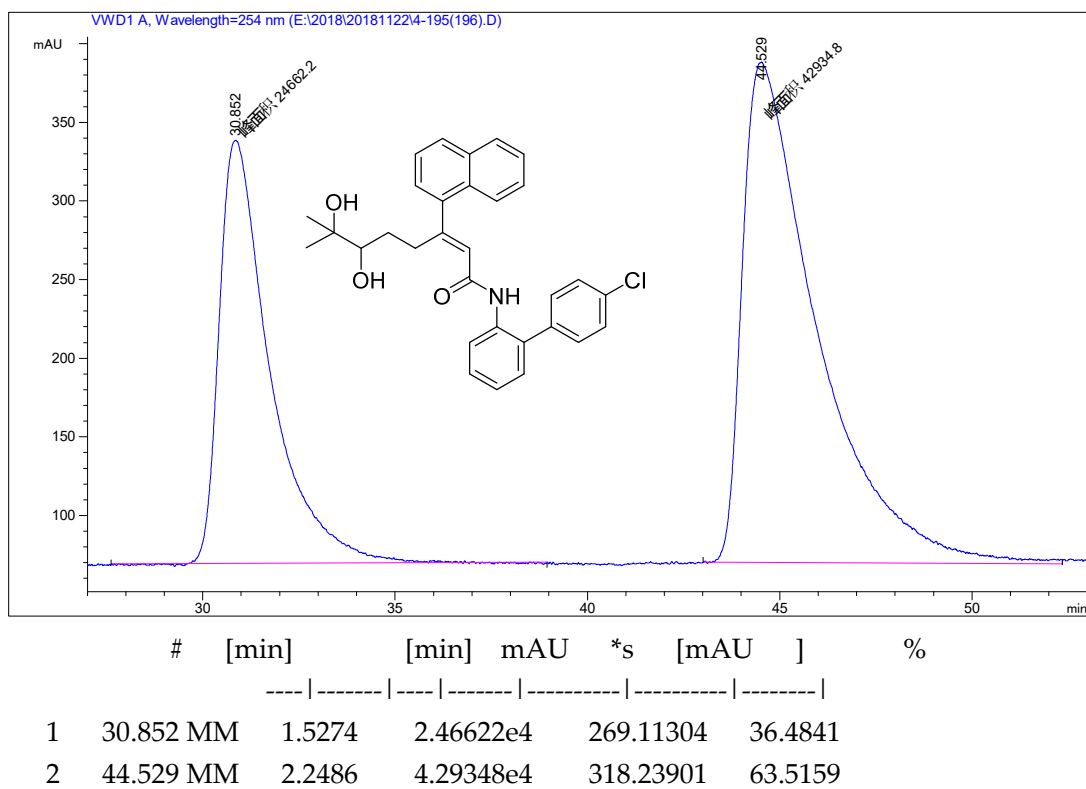

**Figure S109.** HPLC profile of racemic **11n**

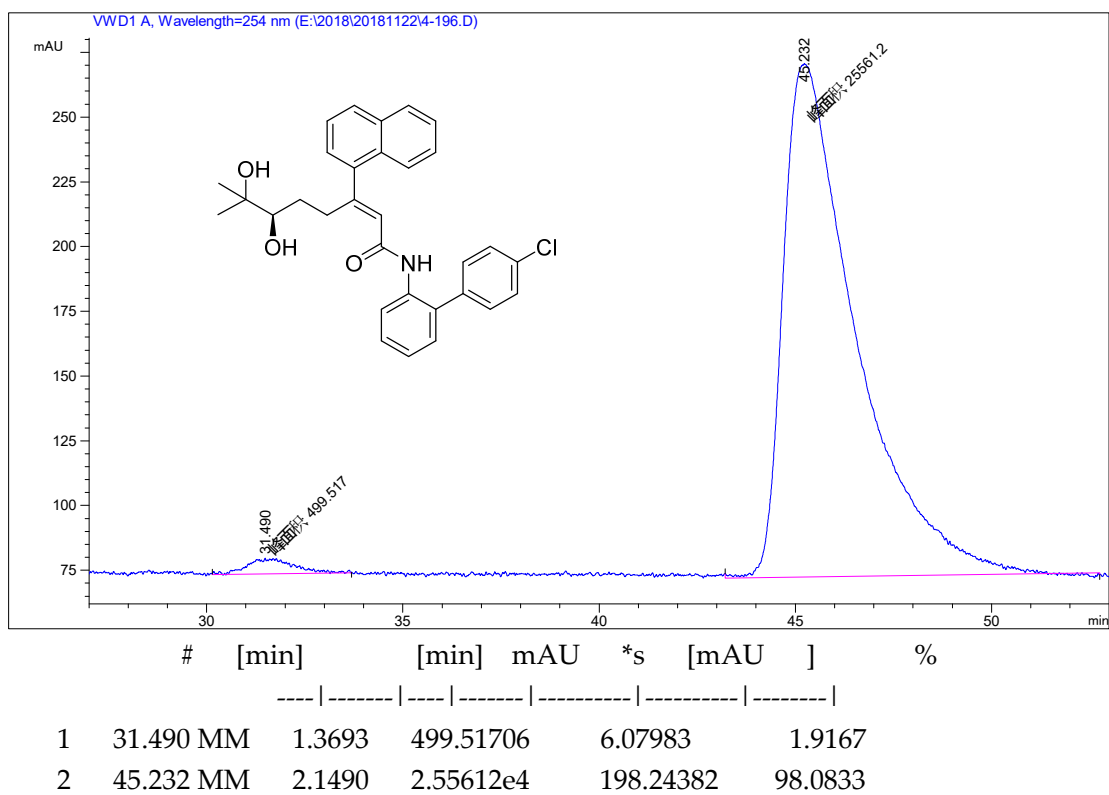

**Figure S110.** HPLC profile of (*R*)-**11n**

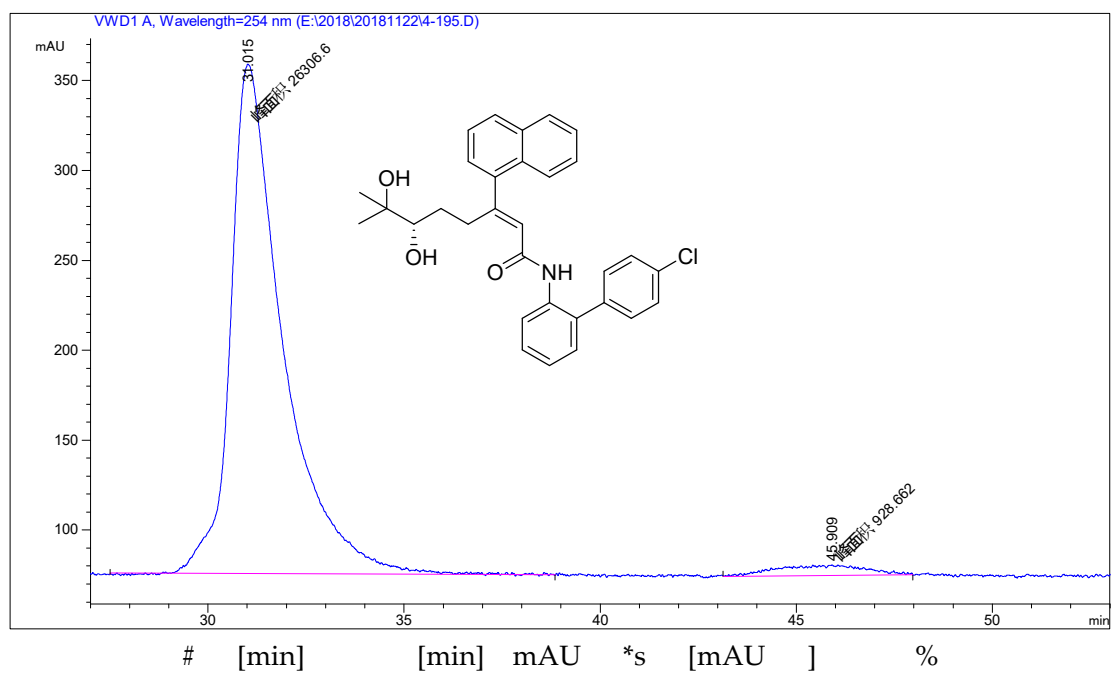

**Figure S111.** HPLC profile of (S)-11n
